# Supplementary material for: Ecological study of the association between mental illness with human development, income inequalities and unemployment across OECD countries
Source: PubMed Central journal article supplement — BMJ Open. 2020 Apr 20;10(4):e035055. doi: 10.1136/bmjopen-2019-035055 (PMC7204933; doi:10.1136/bmjopen-2019-035055), 2020-04-20
Supplement: bmjopen-2019-035055.draft_revisions.pdf [file bmjopen-2019-035055.draft_revisions.pdf]

# BMJ Open

BMJ Open is committed to open peer review. As part of this commitment we make the peer review history of every article we publish publicly available.

When an article is published we post the peer reviewers' comments and the authors' responses online. We also post the versions of the paper that were used during peer review. These are the versions that the peer review comments apply to.

The versions of the paper that follow are the versions that were submitted during the peer review process. They are not the versions of record or the final published versions. They should not be cited or distributed as the published version of this manuscript.

BMJ Open is an open access journal and the full, final, typeset and author-corrected version of record of the manuscript is available on our site with no access controls, subscription charges or pay-per-view fees (<http://bmjopen.bmj.com>).

If you have any questions on BMJ Open's open peer review process please email [info.bmjopen@bmj.com](mailto:info.bmjopen@bmj.com)

# BMJ Open

**An ecological study of the association between mental illness with human development, income inequalities and unemployment across OECD countries: considering the heterogeneity of mental issues and the interdependence of social effects**

|                               |                                                                                              |
|-------------------------------|----------------------------------------------------------------------------------------------|
| Journal:                      | <i>BMJ Open</i>                                                                              |
| Manuscript ID                 | bmjopen-2019-035055                                                                          |
| Article Type:                 | Original research                                                                            |
| Date Submitted by the Author: | 17-Oct-2019                                                                                  |
| Complete List of Authors:     | Barbalat, Guillaume; CNRS & Université Lyon 1<br>Franck , Nicolas ; CNRS & Université Lyon 1 |
| Keywords:                     | MENTAL HEALTH, EPIDEMIOLOGY, SOCIAL MEDICINE                                                 |
|                               |                                                                                              |

SCHOLARONE™  
Manuscripts

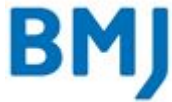

I, the Submitting Author has the right to grant and does grant on behalf of all authors of the Work (as defined in the below author licence), an exclusive licence and/or a non-exclusive licence for contributions from authors who are: i) UK Crown employees; ii) where BMJ has agreed a CC-BY licence shall apply, and/or iii) in accordance with the terms applicable for US Federal Government officers or employees acting as part of their official duties; on a worldwide, perpetual, irrevocable, royalty-free basis to BMJ Publishing Group Ltd ("BMJ") its licensees and where the relevant Journal is co-owned by BMJ to the co-owners of the Journal, to publish the Work in this journal and any other BMJ products and to exploit all rights, as set out in our [licence](#).

The Submitting Author accepts and understands that any supply made under these terms is made by BMJ to the Submitting Author unless you are acting as an employee on behalf of your employer or a postgraduate student of an affiliated institution which is paying any applicable article publishing charge ("APC") for Open Access articles. Where the Submitting Author wishes to make the Work available on an Open Access basis (and intends to pay the relevant APC), the terms of reuse of such Open Access shall be governed by a Creative Commons licence – details of these licences and which [Creative Commons](#) licence will apply to this Work are set out in our licence referred to above.

Other than as permitted in any relevant BMJ Author's Self Archiving Policies, I confirm this Work has not been accepted for publication elsewhere, is not being considered for publication elsewhere and does not duplicate material already published. I confirm all authors consent to publication of this Work and authorise the granting of this licence.

1  
2 **TITLE PAGE**  
3  
4  
5

6 **Title:** An ecological study of the association between mental illness with human development,  
7  
8 income inequalities and unemployment across OECD countries: considering the heterogeneity of  
9  
10 mental issues and the interdependence of social effects.  
11  
12  
13  
14  
15

16 **Authors:** Guillaume BARBALAT, M.D., Ph.D.<sup>1</sup> & Nicolas FRANCK, M.D., Ph.D.<sup>1</sup>  
17

18 <sup>1</sup> Centre Ressource de Réhabilitation Psychosociale,  
19  
20 Centre Hospitalier le Vinatier & UMR 5229,  
21  
22 CNRS & Université Lyon 1,  
23  
24 France  
25  
26  
27  
28

29 **Corresponding author:**  
30

31 Guillaume Barbalat  
32  
33 Centre Ressource de Réhabilitation Psychosociale,  
34  
35 Centre Hospitalier le Vinatier & UMR 5229,  
36  
37 CNRS & Université Lyon 1,  
38  
39 France  
40  
41 +33 7 57 51 22 05  
42  
43 [guillaumebarbalat@gmail.com](mailto:guillaumebarbalat@gmail.com)  
44  
45  
46  
47

48 **Abstract word count:** 297.  
49

50 **Word count:** 1315 (excluding references, tables and acknowledgements).  
51  
52  
53  
54  
55  
56  
57  
58  
59  
60

## **ABSTRACT**

### **OBJECTIVES**

Recent studies have demonstrated worsened mental health in relatively highly developed countries impacted by social inequalities and unemployment. Here, we investigate (1) whether mental health issues are differently or similarly affected by these social factors; and (2) whether their effects on mental health are related or unrelated to each other.

### **SETTING**

Analysis at the country level amongst OECD (Organization for Economic Cooperation and Development) countries (N=36). Data on social indicators was collected from OECD and United Nations Development Programme (UNDP) databases. Data on the prevalence of mental issues was obtained from the Institute for Health Metrics and Evaluation (IHME)'s Global Burden of Disease (GBD) study 2017.

### **PARTICIPANTS**

No involvement of participants.

### **PRIMARY AND SECONDARY OUTCOME MEASURES**

Using linear regression models, we investigated the relative contribution played by human development (as measured by the Human Development Index - HDI), social inequalities (GINI index) and unemployment (unemployment rate) on the prevalence of 10 mental health issues. We then measured the relationship between the socio-economic factors' effects on mental issues using 2x2 Pearson's correlation test and Principal Component Analysis.

### **RESULTS**

First, the overall effect of each socio-economic factor on a combination of mental health disorders was large (r range: 0.51-0.76;  $p < 0.002$ ). However, the influence of social factors on mental health was relative to each mental issue (r range: -0.34 to 0.74). Second, the socio-economic factors' effects on mental health showed strong interdependence ( $r_{\text{HDI-GINI}} = 0.93$ ,  $r_{\text{HDI-unemploy}} = 0.81$ ,  $r_{\text{unemploy-GINI}} = 0.84$ ;  $p < 0.001$ ). Principal component analysis demonstrated that the first principal component of

1  
2 the three variables ( $r_{\text{HDI}}$ ,  $r_{\text{GINI}}$ ,  $r_{\text{unemploy}}$ ) explained 91.5% of the variance.  
3

#### 4 **CONCLUSION**

5  
6  
7 These results implore a re-analysis of the socio-economic determinants of mental health where: 1)  
8  
9 the heterogeneity of mental health issues would be taken into account; and 2) each socio-  
10  
11 economic indicator's effect would be analysed and interpreted in conjunction with the others.  
12  
13  
14  
15  
16  
17  
18  
19  
20  
21  
22  
23  
24  
25  
26  
27  
28  
29  
30  
31  
32  
33  
34  
35  
36  
37  
38  
39  
40  
41  
42  
43  
44  
45  
46  
47  
48  
49  
50  
51  
52  
53  
54  
55  
56  
57  
58  
59  
60

For peer review only

## **STRENGTHS AND LIMITATIONS OF THIS STUDY**

- We investigated whether mental health issues across OECD countries were differently affected by human development, income inequalities and unemployment; and whether these social factors' effects on mental health were related to each other
- Data on the prevalence of mental issues was obtained from the Institute for Health Metrics and Evaluation (IHME)'s Global Burden of Disease (GBD) study 2017, from which an increasing number of high-impact epidemiological studies has already been published
- We found that the strength of the association between mental health with development, inequalities and unemployment was relative to each mental health issue; and that their effects were strongly related to each other
- We conclude that, when investigating the social determinants of mental health, it is crucial to consider the heterogeneity of mental issues and the interdependence of social effects
- One limitation of this study is its observational nature, meaning that we need to be cautious about any over-interpretation of our results as demonstrating causality

## **MAIN TEXT**

### **INTRODUCTION**

Recent studies have suggested that relatively highly developed countries demonstrate worsened mental health when impacted by income inequalities [1–3] and unemployment [4]. Although this has been of great interest to social epidemiologists, two important questions have remained unanswered. First, it is unclear whether mental health issues are differently or similarly affected by these social factors. Given the heterogeneity of mental health problems, one would expect a differential impact of these social factors on various mental health issues. A second uncertainty is whether their effects on mental health are related or unrelated to each other. If they are related, a hypothesis might be that there is an underlying common structure that may account for such effects.

This study aimed at better categorizing the relations between development, inequalities, and unemployment with the prevalence of various mental health issues at the country level. To allow for comparability across populations and minimize the risk of outliers, we restricted our analyses to the 36 countries that belong to the Organization for Economic Cooperation and Development (OECD).

### **METHODS**

#### **Data series**

##### Dependent variable

Prevalences of mental health issues across OECD countries were collected from the Institute of Health Metrics & Evaluation (IHME)'s Global Burden of Disease (GBD) project database [5], where data is estimated from a combination of surveys, medical and epidemiological data, as well as meta-regression models.

Data was extracted for year 2017 for a combination of mental health disorders and the specific following issues: depressive disorders, anxiety disorders, schizophrenia, bipolar disorders,



1  
2 eating disorders, alcohol use disorders, attention-deficit/hyperactivity disorder, autism spectrum  
3 disorders and suicide (**Table 1**). Prevalence data was age standardized, which allowed  
4 comparability across populations when their age profiles were different.  
5  
6  
7  
8  
9

### 10 11 Independent variables

12  
13 Each country's level of human development was measured with the Human Development Index  
14 (HDI; range: 0-1). The HDI summarizes life expectancy, a combination of adult literacy rate and  
15 school enrolment rate, and gross domestic product per capita at purchasing power parity [6].  
16  
17  
18  
19

20  
21 For each country, income inequality was measured using the GINI index (range: 0-1), which  
22 intends to represent a nation's income distribution [7]. A GINI coefficient of 0 means that the  
23 country income is perfectly equally distributed. A GINI coefficient of 1 means that all the country's  
24 income is received by just one person.  
25  
26  
27  
28

29  
30 Our third socio-economic indicator was unemployment rate, which measures the rate of  
31 unemployment as a percentage of the labour force [8].  
32  
33

34  
35 Data for the three predictors was collected from the OECD database except for HDI, which  
36 was retrieved from the United Nations Development Programme database (**Table 1**). Data was  
37 extracted for year 2016, except when unavailable, in which case data was extracted for the closest  
38 year previous to 2016 (year range for data collection: 2014-2016).  
39  
40  
41  
42

43 -----  
44  
45 *Table 1 about here*  
46  
47  
48  
49 -----

### 50 51 52 53 **Statistical Analysis**

54  
55 We ran multiple regression linear models where the prevalence of a mental issue across OECD  
56 countries is predicted by the HDI, GINI index, and unemployment rate. Extreme outliers were  
57 defined as data points with Cook's distance > 1 [9]. Using this cut-off, we were not able to identify  
58  
59  
60

1  
2 any outliers when running our linear models.  
3

4 For each mental health issue, we then converted each of the socio-economic indicators' t  
5 statistic into their corresponding effect size (Pearson's  $r_{\text{HDI}}$ ,  $r_{\text{GINI}}$ ,  $r_{\text{unemploy}}$ ). We then computed 2x2  
6 Pearson's correlation coefficients between those 3 variables ( $r_{\text{HDI-GINI}}$ ,  $r_{\text{HDI-unemploy}}$ ,  $r_{\text{unemploy-GINI}}$ ) to  
7 estimate their pairwise relationships across all mental health problems. Finally, to investigate the  
8 linear dependency between the 3 indicators' effect sizes, we ran principal component analysis and  
9 obtained explained variance for the first principal component.  
10  
11  
12  
13  
14  
15  
16

17 An important caveat when collecting mental health data at the country level is that  
18 prevalence could reflect healthcare spending (which allows for more focus on mental health  
19 disorders) rather than giving a representative perspective on differences between countries. For  
20 our data, Pearson's  $r$  between combined mental health disorders prevalence and healthcare  
21 spending as measured by price per capita at purchasing power parity (obtained from the OECD  
22 database [10]) was of 0.58 ( $p < 0.001$ ). To check that our results were not impacted by overall  
23 healthcare expenditures, we decided to regress out the influence of healthcare spending on the  
24 prevalence of each mental health issue and to re-run our analysis using the residuals as  
25 dependent variables. Finally, to check that our results were not too influenced by outliers, we also  
26 ran our analysis using robust regression methods.  
27  
28  
29  
30  
31  
32  
33  
34  
35  
36  
37

38  
39 To run these analyses, we used R 3.6.1.  
40  
41  
42  
43

#### 44 **Patient and public involvement**

45  
46  
47 No patients were involved in this study.  
48  
49  
50  
51

## 52 **RESULTS**

53  
54  
55 Multiple linear regression models performed on the prevalence of a combination of mental health  
56 disorders revealed that the effect of development ( $r_{\text{HDI}}$ ), inequalities ( $r_{\text{GINI}}$ ) and unemployment  
57 ( $r_{\text{unemploy}}$ ) was large ( $r$  range: 0.51-0.76). However they demonstrated great variation when  
58 measured amongst different mental health issues ( $r$  range: -0.34 to 0.74; **Table 2 and**  
59  
60

1  
2 **Supplementary Table 1**), the most prominent being no positive effect on suicide and alcohol use  
3  
4 disorders, and a larger effect on other mental disorders.

5  
6 Across mental issues, the socio-economic indicators' effect sizes were strongly related to  
7  
8 each other (Pearson's  $r_{\text{HDI-GINI}}=0.93$ ,  $r_{\text{HDI-unemploy}}=0.81$ ,  $r_{\text{unemploy-GINI}}=0.84$ ). Principal component  
9  
10 analysis demonstrated that the first principal component of the three variables ( $r_{\text{HDI}}$ ,  $r_{\text{GINI}}$ ,  $r_{\text{unemploy}}$ )  
11  
12 explained 91.5% of the variance ( $p=0$ , permutation test with 1000 repetitions).  
13  
14

15  
16 -----  
17  
18 *Table 2 about here*  
19  
20 -----  
21  
22

23  
24  
25  
26 Finally, note that re-running our analysis after controlling for overall healthcare spending  
27  
28 across countries and using robust method to control for outliers clearly reproduced this pattern of  
29  
30 results (**Supplementary Results; Supplementary Tables 2 and 3**).  
31  
32

## 33 34 35 **DISCUSSION**

36  
37 We first demonstrated that, amongst OECD countries, the strength of the relationship between the  
38  
39 prevalence of mental health issues with development, inequalities and unemployment, whilst  
40  
41 overall large for a combination of disorders, was in fact relative to each mental health issue.  
42  
43 Specifically, development, inequalities and unemployment did not negatively impact suicide and  
44  
45 alcohol use disorders where prevalence could be influenced by other, more fine-grained, socio-  
46  
47 cultural factors (such as long-term unemployment [11] or work stress [12]). In contrast, other  
48  
49 disorders tested in this study were clearly associated to these social factors though to various  
50  
51 degrees. Hypotheses on how each of those mental issues specifically relies to development,  
52  
53 inequalities and unemployment are beyond the scope of this study and are open to further  
54  
55 empirical testing.  
56  
57

58  
59 A second important finding of our study is that the socio-economic factors' effects on mental  
60

1 health are strongly related to each other. This suggests that they share an underlying common  
2 structure. In modern societies, development, inequalities and unemployment can all be viewed as  
3 indicators of key cultural values and norms. That is, a high level of development sets priorities for  
4 people to reach a high threshold of desired outcomes [13]; greater income inequalities can shape  
5 attitudes towards reaching a higher social position compared to others [14]; and not having a job is  
6 typically perceived as being a failure. Overall, these social factors' unifying feature may be their  
7 underlying pressure for success, which in turn could explain their negative impact on mental  
8 health.  
9  
10  
11  
12  
13  
14  
15  
16  
17  
18  
19  
20  
21

## 22 **Limitations**

23  
24 First, because our research questions were directly related to the association of national-level  
25 mental health prevalence and socio-economic indicators, we considered the ecological design the  
26 most appropriate for our study [1]. However, the observational nature of our analysis implies that  
27 other uncontrolled socio-cultural factors might have influenced the prevalence of mental issues in  
28 individual countries. We obviously need to be careful about any over-interpretation of our results as  
29 demonstrating causality while our models can only be predictive.  
30  
31  
32  
33  
34  
35  
36

37 Second, it is likely that the effect of development, inequalities, and unemployment is  
38 different across non-OECD countries and especially low and middle income countries. However,  
39 as most of the European and North American populations were included, our results are probably  
40 generalizable to western countries.  
41  
42  
43  
44  
45  
46  
47  
48

## 49 **Conclusion**

50  
51 Despite those limitations, these results implore a re-analysis of the socio-economic determinants of  
52 mental health where: 1) the heterogeneity of mental health issues would be taken into account;  
53 and 2) each socio-economic indicator's effect would be analysed and interpreted in conjunction  
54 with the others.  
55  
56  
57  
58  
59  
60

1  
2 **DECLARATION OF INTEREST**  
3

4 The authors have no biomedical financial interests or potential conflicts of interest.  
5  
6  
7

8 **FUNDING**  
9

10 This research received no specific grant from any funding agency, commercial or not-for-profit  
11 sectors.  
12  
13  
14

15  
16 **AUTHOR CONTRIBUTION**  
17

18 All authors were involved in drafting the article or revising it critically for important intellectual  
19 content, and have read and approved the final version of the manuscript. G.B. and N.F. designed  
20 the study. G.B. gathered the data. G.B. and N.F. analysed the data and wrote the paper.  
21  
22  
23  
24  
25  
26  
27

28 **DATA AVAILABILITY**  
29

30 Data is available upon request to the corresponding author.  
31  
32  
33  
34  
35  
36  
37  
38  
39  
40  
41  
42  
43  
44  
45  
46  
47  
48  
49  
50  
51  
52  
53  
54  
55  
56  
57  
58  
59  
60

1  
2  
3  
4  
5  
6  
7  
8  
9  
10  
11  
12  
13  
14  
15  
16  
17  
18  
19  
20  
21  
22  
23  
24  
25  
26  
27  
28  
29  
30  
31  
32  
33  
34  
35  
36  
37  
38  
39  
40  
41  
42  
43  
44  
45  
46  
47  
48  
49  
50  
51  
52  
53  
54  
55  
56  
57  
58  
59  
60  

## REFERENCES

- 1 Wilkinson RG, Pickett KE. Income inequality and social dysfunction. *Annu Rev Sociol* 2009;**35**:493–511.
- 2 Ribeiro WS, Bauer A, Andrade MCR, *et al*. Income inequality and mental illness-related morbidity and resilience: a systematic review and meta-analysis. *Lancet Psychiatry* 2017;**4**:554–562.
- 3 Patel V, Burns JK, Dhingra M, *et al*. Income inequality and depression: a systematic review and meta-analysis of the association and a scoping review of mechanisms. *World Psychiatry* 2018;**17**:76–89.
- 4 Stuckler D, Basu S, Suhrcke M, *et al*. The public health effect of economic crises and alternative policy responses in Europe: an empirical analysis. *The Lancet* 2009;**374**:315–323.
- 5 Global Burden of Disease Collaborative Network. Global Burden of Disease Study 2017 (GBD 2017) Incidence, Prevalence, and Years Lived with Disability 1990–2017. Seattle, United States: Institute for Health Metrics and Evaluation (IHME), 2018.
- 6 Human Development Reports. <http://hdr.undp.org/en/indicators/137506#>
- 7 Inequality - Income inequality - OECD Data. The OECD. <http://data.oecd.org/inequality/income-inequality.htm>
- 8 Unemployment - Unemployment rate - OECD Data. The OECD. <http://data.oecd.org/unemp/unemployment-rate.htm>
- 9 Cook RD. Detection of influential observation in linear regression. *Technometrics* 1977;**19**:15–18.
- 10 Health resources - Health spending - OECD Data. The OECD. <http://data.oecd.org/healthres/health-spending.htm>
- 11 Milner A, Page A, LaMontagne AD. Duration of unemployment and suicide in Australia over the period 1985–2006: an ecological investigation by sex and age during rising versus declining national unemployment rates. *J Epidemiol Community Health* 2013;**67**:237–44.
- 12 Boxer PA, Burnett C, Swanson N. Suicide and occupation: a review of the literature. *J Occup Environ Med* 1995;**37**:442–52.
- 13 James O. *Affluenza—a contagious middle class virus causing depression, anxiety, addiction and ennui*. Random House, London 2007.
- 14 Pickett K, Wilkinson R. *The Spirit Level: Why Equality is Better for Everyone*. Penguin UK 2010.

**TABLES****Table 1. Descriptive statistics for dependent and independent variables.**

| Variable                                                        | Range       | Mean  | Standard Deviation |
|-----------------------------------------------------------------|-------------|-------|--------------------|
| Prevalence of combined mental health disorders <sup>a</sup> (%) | 10.87-18.71 | 14.28 | 2.13               |
| Prevalence of Autism Spectrum Disorders (%)                     | 0.36-0.94   | 0.60  | 0.12               |
| Prevalence of ADHD (%)                                          | 0.43-2.53   | 1.15  | 0.40               |
| Prevalence of Depressive Disorders (%)                          | 2.25-4.84   | 3.71  | 0.65               |
| Prevalence of Schizophrenia (%)                                 | 0.20-0.36   | 0.26  | 0.05               |
| Prevalence of Anxiety Disorders (%)                             | 2.94-8.50   | 4.93  | 1.46               |
| Prevalence of Eating Disorders (%)                              | 0.23-0.94   | 0.48  | 0.18               |
| Prevalence of Alcohol Use Disorders (%)                         | 0.46-4.71   | 1.84  | 0.99               |
| Prevalence of Suicide (per 100.000)                             | 3.31-27.99  | 10.89 | 4.75               |
| Prevalence of Bipolar Disorders (%)                             | 0.57-1.21   | 0.86  | 0.15               |
| HDI                                                             | 0.77-0.95   | 0.89  | 0.04               |
| GINI index                                                      | 0.24-0.46   | 0.32  | 0.05               |
| Unemployment rate (%)                                           | 2.97-23.54  | 7.41  | 4.20               |

<sup>a</sup> this includes Autism Spectrum Disorders, ADHD, Conduct Disorders, Idiopathic developmental intellectual disability, Depressive disorders, Schizophrenia, Anxiety disorders, Eating disorder and Bipolar disorders.

**Table 2: Effects of human development, income inequalities and unemployment on the prevalence of 10 mental health issues across OECD countries.**

| Pearson's r           | Combined | ASD  | ADHD | DEP  | SCZ  | ANX  | ED   | ETOH  | SUICIDE | BD   |
|-----------------------|----------|------|------|------|------|------|------|-------|---------|------|
| $r_{\text{HDI}}$      | 0.76     | 0.74 | 0.21 | 0.68 | 0.72 | 0.65 | 0.74 | -0.27 | -0.07   | 0.43 |
| $r_{\text{GINI}}$     | 0.59     | 0.46 | 0.30 | 0.59 | 0.49 | 0.40 | 0.45 | -0.10 | -0.07   | 0.14 |
| $r_{\text{unemploy}}$ | 0.51     | 0.15 | 0.27 | 0.42 | 0.18 | 0.29 | 0.45 | -0.18 | -0.34   | 0.30 |

“Combined”: combination of Autism Spectrum Disorders, Attention-Deficit/Hyperactivity Disorders, Conduct Disorders, Idiopathic developmental intellectual disability, Depressive disorders, Schizophrenia, Anxiety disorders, Eating disorder and Bipolar disorders; “ASD”: Autism Spectrum Disorders; “ADHD”: Attention-Deficit/Hyperactivity Disorders; “DEP”: Depressive Disorders; “SCZ”: Schizophrenia; “ANX”: Anxiety Disorders; “ED”: Eating Disorders; “ETOH”: Alcohol Use Disorders; “SUICIDE”: suicide rates; “BD”: Bipolar Disorders.



## SUPPLEMENTARY MATERIAL

### SUPPLEMENTARY RESULTS

#### Analysis taking into account overall healthcare spending

To ensure that our results were not impacted by overall healthcare expenditures, we decided to regress out the influence of healthcare spending on the prevalence of each mental health issue and to re-run our analysis using the residuals as dependent variables. When performed on a combination of mental health disorders, multiple linear regression models revealed that the effect of development ( $r_{\text{HDI}}$ ), inequalities ( $r_{\text{GINI}}$ ) and unemployment ( $r_{\text{unemploy}}$ ) was medium to large ( $r$  range: 0.47-0.54). However they demonstrated great variation when performed amongst different mental health issues ( $r$  range: -0.34 to 0.52, **Supplementary Table 2**).

Across mental issues, the socio-economic indicators' effect sizes were strongly related to each other ( $r_{\text{HDI-GINI}}=0.89$ ,  $r_{\text{HDI-unemploy}}=0.93$ ,  $r_{\text{unemploy-GINI}}=0.87$ ). Principal component analysis demonstrated that the first principal component of the three variables ( $r_{\text{HDI}}$ ,  $r_{\text{GINI}}$ ,  $r_{\text{unemploy}}$ ) explained 94% of the variance ( $p=0$ , permutation test with 1000 repetitions).

Therefore, this analysis yield similar results than that reported in the main text.

#### Analysis using robust regression methods

To ensure that our results were not impacted by outliers, we re-ran our analyses using robust regression methods [1]. We used the `lmrob` function from the `robustbase` package in R (version 3.6.1), which computes fast MM-type estimators for linear regression models. We sat the default arguments as suggested in Koller and Stahel (2011) with an initial S-estimate, followed by an M-estimate, a Design Adaptive Scale estimate and a final M-step; and a "linear quadratic quadratic" (lqq for short) psi function [2].

When performed on a combination of mental health disorders, multiple linear regression

1  
2 models revealed that the effect of development ( $r_{\text{HDI}}$ ), inequalities ( $r_{\text{GINI}}$ ) and unemployment ( $r_{\text{unemploy}}$ )  
3  
4 was medium to large ( $r$  range: 0.44-0.59). However they demonstrated great variation when  
5  
6 performed amongst different mental health issues ( $r$  range: -0.43 to 0.55, **Supplementary Table**  
7  
8 **3**). Across mental issues, the socio-economic indicators' effect sizes were strongly related to each  
9  
10 other ( $r_{\text{HDI-GINI}}=0.93$ ,  $r_{\text{HDI-unemploy}}=0.87$ ,  $r_{\text{unemploy-GINI}}=0.91$ ). Principal component analysis demonstrated  
11  
12 that the first principal component of the three variables ( $r_{\text{HDI}}$ ,  $r_{\text{GINI}}$ ,  $r_{\text{unemploy}}$ ) explained 94% of the  
13  
14 variance ( $p=0$ , permutation test with 1000 repetitions).  
15

16  
17 Therefore, results using robust linear regression methods were highly comparable to those  
18  
19 using non-robust methods.  
20  
21  
22  
23  
24  
25  
26  
27  
28  
29  
30  
31  
32  
33  
34  
35  
36  
37  
38  
39  
40  
41  
42  
43  
44  
45  
46  
47  
48  
49  
50  
51  
52  
53  
54  
55  
56  
57  
58  
59  
60

1  
2  
3 **SUPPLEMENTARY TABLES**  
4  
5

6 **Supplementary Table 1. Summary statistics of multiple linear regression models run on the**  
7 **prevalence of 10 mental health issues.**  
8

9  
10  
11  
12  
13  
14  
15  
16  
17  
18  
19  
20  
21  
22  
23  
24  
25  
26  
27  
28  
29  
30  
31  
32  
33  
34  
35  
36  
37  
38  
39  
40  
41  
42  
43  
44  
45  
46  
47  
48  
49  
50  
51  
52  
53  
54  
55  
56  
57  
58  
59  
60

| Predictor                                        | Estimator coefficient | 95% Confidence interval | T value | Effect size (Pearson's r) | P value   |
|--------------------------------------------------|-----------------------|-------------------------|---------|---------------------------|-----------|
| <b>Combined mental health issues<sup>a</sup></b> |                       |                         |         |                           |           |
| HDI                                              | 45.9                  | 31.8 to 60.1            | 6.6     | 0.76                      | 0.0000002 |
| GINI index                                       | 22.1                  | 11.2 to 33.0            | 4.1     | 0.59                      | 0.0002    |
| Unemployment                                     | 0.2                   | 0.08 to 0.3             | 3.3     | 0.51                      | 0.002     |
| <b>Autism Spectrum Disorder</b>                  |                       |                         |         |                           |           |
| HDI                                              | 2.5                   | 1.7 to 3.3              | 6.3     | 0.74                      | 0.0000005 |
| GINI index                                       | 0.9                   | 0.3 to 1.5              | 3.0     | 0.46                      | 0.006     |
| Unemployment                                     | 0.003                 | -0.004 to 0.01          | 0.8     | 0.15                      | 0.4       |
| <b>ADHD</b>                                      |                       |                         |         |                           |           |
| HDI                                              | 2.3                   | -1.6 to 6.1             | 1.2     | 0.21                      | 0.2       |
| GINI index                                       | 2.6                   | -0.4 to 5.6             | 1.8     | 0.30                      | 0.09      |
| Unemployment                                     | 0.03                  | -0.007 to 0.06          | 1.6     | 0.27                      | 0.1       |
| <b>Depressive Disorders</b>                      |                       |                         |         |                           |           |
| HDI                                              | 12.3                  | 7.6 to 17.1             | 5.2     | 0.68                      | 0.000009  |
| GINI index                                       | 7.5                   | 3.9 to 11.2             | 4.2     | 0.59                      | 0.0002    |
| Unemployment                                     | 0.05                  | 0.01 to 0.09            | 2.6     | 0.42                      | 0.01      |
| <b>Schizophrenia</b>                             |                       |                         |         |                           |           |
| HDI                                              | 1.0                   | 0.6 to 1.3              | 5.8     | 0.72                      | 0.000002  |
| GINI index                                       | 0.4                   | 0.1 to 0.7              | 3.1     | 0.49                      | 0.004     |
| Unemployment                                     | 0.001                 | -0.001 to 0.004         | 1.0     | 0.18                      | 0.3       |
| <b>Anxiety Disorders</b>                         |                       |                         |         |                           |           |
| HDI                                              | 27.4                  | 15.9 to 38.9            | 4.9     | 0.65                      | 0.00003   |
| GINI index                                       | 10.6                  | 1.7 to 19.4             | 2.4     | 0.40                      | 0.02      |
| Unemployment                                     | 0.08                  | -0.02 to 0.2            | 1.7     | 0.29                      | 0.1       |
| <b>Eating Disorders</b>                          |                       |                         |         |                           |           |
| HDI                                              | 3.7                   | 2.5 to 4.9              | 6.2     | 0.74                      | 0.0000005 |
| GINI index                                       | 1.3                   | 0.4 to 2.2              | 2.8     | 0.45                      | 0.008     |
| Unemployment                                     | 0.01                  | 0.004 to 0.02           | 2.8     | 0.45                      | 0.008     |
| <b>Alcohol Use Disorders</b>                     |                       |                         |         |                           |           |
| HDI                                              | -7.6                  | -17.5 to 2.3            | -1.6    | -0.27                     | 0.1       |
| GINI index                                       | -2.1                  | -9.7 to 5.5             | -0.6    | -0.10                     | 0.6       |
| Unemployment                                     | -0.04                 | -0.1 to 0.04            | -1.0    | -0.18                     | 0.3       |

Supplementary Table 1 continued

| Predictor                | Estimator coefficient | 95% Confidence interval | T value | Effect size (Pearson's r) | P value |
|--------------------------|-----------------------|-------------------------|---------|---------------------------|---------|
| <b>Suicide</b>           |                       |                         |         |                           |         |
| HDI                      | -9.1                  | -55.6 to 37.4           | -0.4    | -0.07                     | 0.7     |
| GINI index               | -6.8                  | -42.6 to 28.9           | -0.4    | -0.07                     | 0.7     |
| Unemployment             | -0.4                  | -0.8 to 0.0005          | -2.0    | -0.34                     | 0.05    |
| <b>Bipolar Disorders</b> |                       |                         |         |                           |         |
| HDI                      | 1.8                   | 0.4 to 3.2              | 2.7     | 0.43                      | 0.01    |
| GINI index               | 0.4                   | -0.6 to 1.5             | 0.8     | 0.14                      | 0.4     |
| Unemployment             | 0.01                  | -0.001 to 0.02          | 1.8     | 0.30                      | 0.08    |

<sup>a</sup> this includes Autism Spectrum Disorders, ADHD, Conduct Disorders, Idiopathic developmental intellectual disability, Depressive disorders, Schizophrenia, Anxiety disorders, Eating disorder and Bipolar disorders.

**Supplementary Table 2. Summary statistics of multiple linear regression models run on the prevalence of 10 mental health issues after controlling for overall healthcare spending.**

| Predictor                                        | Estimator coefficient | 95% Confidence interval | T value | Effect size (Pearson's r) | P value |
|--------------------------------------------------|-----------------------|-------------------------|---------|---------------------------|---------|
| <b>Combined mental health issues<sup>a</sup></b> |                       |                         |         |                           |         |
| HDI                                              | 20.5                  | 6.6 to 34.4             | 3.0     | 0.47                      | 0.005   |
| GINI index                                       | 16.9                  | 6.2 to 27.6             | 3.2     | 0.49                      | 0.003   |
| Unemployment                                     | 0.2                   | 0.1 to 0.3              | 3.7     | 0.54                      | 0.0009  |
| <b>Autism Spectrum Disorder</b>                  |                       |                         |         |                           |         |
| HDI                                              | 1.0                   | 0.1 to 1.8              | 2.3     | 0.38                      | 0.03    |
| GINI index                                       | 0.6                   | -0.1 to 1.3             | 1.5     | 0.31                      | 0.08    |
| Unemployment                                     | 0.004                 | -0.004 to 0.01          | 1.0     | 0.18                      | 0.3     |
| <b>ADHD</b>                                      |                       |                         |         |                           |         |
| HDI                                              | 2.4                   | -1.4 to 6.3             | 1.3     | 0.22                      | 0.2     |
| GINI index                                       | 2.6                   | -0.4 to 5.6             | 1.8     | 0.30                      | 0.1     |
| Unemployment                                     | 0.03                  | -0.008 to 0.06          | 1.6     | 0.27                      | 0.1     |
| <b>Depressive Disorders</b>                      |                       |                         |         |                           |         |
| HDI                                              | 6.2                   | 1.4 to 10.9             | 2.6     | 0.42                      | 0.01    |
| GINI index                                       | 6.3                   | 2.6 to 9.9              | 3.5     | 0.52                      | 0.001   |
| Unemployment                                     | 0.06                  | 0.02 to 0.1             | 2.8     | 0.45                      | 0.008   |
| <b>Schizophrenia</b>                             |                       |                         |         |                           |         |
| HDI                                              | 0.4                   | 0.04 to 0.8             | 2.3     | 0.38                      | 0.03    |
| GINI index                                       | 0.3                   | 0.01 to 0.6             | 2.1     | 0.35                      | 0.04    |
| Unemployment                                     | 0.002                 | -0.001 to 0.005         | 1.2     | 0.21                      | 0.2     |
| <b>Anxiety Disorders</b>                         |                       |                         |         |                           |         |
| HDI                                              | 9.6                   | -1.5 to 20.7            | 1.8     | 0.30                      | 0.09    |
| GINI index                                       | 6.9                   | -1.6 to 15.4            | 1.7     | 0.28                      | 0.1     |
| Unemployment                                     | 0.09                  | -0.001 to 0.2           | 2.0     | 0.34                      | 0.05    |
| <b>Eating Disorders</b>                          |                       |                         |         |                           |         |
| HDI                                              | 1.8                   | 0.5 to 3.1              | 2.8     | 0.44                      | 0.009   |
| GINI index                                       | 0.9                   | -0.1 to 1.9             | 1.8     | 0.31                      | 0.08    |
| Unemployment                                     | 0.02                  | 0.005 to 0.03           | 2.9     | 0.42                      | 0.007   |
| <b>Alcohol Use Disorders</b>                     |                       |                         |         |                           |         |
| HDI                                              | -2.2                  | -12.0 to 7.5            | -0.5    | -0.08                     | 0.6     |
| GINI index                                       | -1.0                  | -8.5 to 6.5             | -0.3    | -0.05                     | 0.8     |
| Unemployment                                     | -0.05                 | -0.1 to 0.04            | -1.1    | -0.20                     | 0.3     |

Supplementary Table 2 continued

| Predictor                | Estimator coefficient | 95% Confidence interval | T value | Effect size (Pearson's r) | P value |
|--------------------------|-----------------------|-------------------------|---------|---------------------------|---------|
| <b>Suicide</b>           |                       |                         |         |                           |         |
| HDI                      | -7.8                  | -54.2 to 38.7           | -0.3    | -0.06                     | 0.7     |
| GINI index               | -6.5                  | -42.3 to 29.2           | -0.4    | -0.07                     | 0.7     |
| Unemployment             | -0.4                  | -0.8 to -0.0008         | -2.0    | -0.34                     | 0.05    |
| <b>Bipolar Disorders</b> |                       |                         |         |                           |         |
| HDI                      | 1.2                   | -0.2 to 2.7             | 1.7     | 0.29                      | 0.09    |
| GINI index               | 0.3                   | -0.8 to 1.4             | 0.6     | 0.10                      | 0.6     |
| Unemployment             | 0.01                  | -0.001 to 0.02          | 1.8     | 0.30                      | 0.08    |

<sup>a</sup> this includes Autism Spectrum Disorders, ADHD, Conduct Disorders, Idiopathic developmental intellectual disability, Depressive disorders, Schizophrenia, Anxiety disorders, Eating disorder and Bipolar disorders.

**Supplementary Table 3. Summary statistics of multiple linear models run on the prevalence of 10 mental health issues using robust regression methods (after controlling for overall healthcare spending).**

| Predictor                                           | Estimator coefficient | 95% Confidence interval | T value | Effect size (Pearson's r) | P value |
|-----------------------------------------------------|-----------------------|-------------------------|---------|---------------------------|---------|
| <b>Combined mental health disorders<sup>a</sup></b> |                       |                         |         |                           |         |
| HDI                                                 | 17.5                  | 4.5 to 30.5             | 2.7     | 0.44                      | 0.01    |
| GINI index                                          | 13.9                  | 3.8 to 24.0             | 2.8     | 0.44                      | 0.01    |
| Unemployment                                        | 0.2                   | 0.1 to 0.3              | 4.1     | 0.59                      | 0.0002  |
| <b>Autism Spectrum Disorders</b>                    |                       |                         |         |                           |         |
| HDI                                                 | 0.9                   | 0.2 to 1.6              | 2.6     | 0.42                      | 0.01    |
| GINI index                                          | 0.6                   | 0.06 to 1.1             | 2.3     | 0.37                      | 0.03    |
| Unemployment                                        | 0.004                 | -0.001 to 0.01          | 1.5     | 0.26                      | 0.1     |
| <b>ADHD</b>                                         |                       |                         |         |                           |         |
| HDI                                                 | 1.5                   | -1.6 to 4.6             | 1.0     | 0.17                      | 0.3     |
| GINI index                                          | 1.5                   | -0.8 to 3.9             | 1.3     | 0.23                      | 0.2     |
| Unemployment                                        | 0.03                  | 0.0009 to 0.05          | 2.1     | 0.35                      | 0.04    |
| <b>Depressive Disorders</b>                         |                       |                         |         |                           |         |
| HDI                                                 | 6.4                   | 1.6 to 11.2             | 2.7     | 0.43                      | 0.01    |
| GINI index                                          | 6.7                   | 3.0 to 10.4             | 3.7     | 0.55                      | 0.0008  |
| Unemployment                                        | 0.06                  | 0.02 to 0.1             | 2.8     | 0.45                      | 0.008   |
| <b>Schizophrenia</b>                                |                       |                         |         |                           |         |
| HDI                                                 | 0.3                   | -0.0003 to 0.7          | 2.0     | 0.34                      | 0.05    |
| GINI index                                          | 0.2                   | -0.02 to 0.5            | 1.9     | 0.32                      | 0.07    |
| Unemployment                                        | 0.002                 | -0.001 to 0.005         | 1.3     | 0.23                      | 0.2     |
| <b>Anxiety Disorders</b>                            |                       |                         |         |                           |         |
| HDI                                                 | 7.4                   | -2.6 to 17.5            | 1.5     | 0.26                      | 0.1     |
| GINI index                                          | 4.4                   | -3.5 to 12.3            | 1.1     | 0.20                      | 0.3     |
| Unemployment                                        | 0.1                   | 0.02 to 0.2             | 2.4     | 0.40                      | 0.02    |
| <b>Eating Disorders</b>                             |                       |                         |         |                           |         |
| HDI                                                 | 1.9                   | 0.8 to 3.0              | 3.5     | 0.52                      | 0.001   |
| GINI index                                          | 1.2                   | 0.3 to 2.0              | 2.7     | 0.43                      | 0.01    |
| Unemployment                                        | 0.02                  | 0.006 to 0.02           | 3.4     | 0.52                      | 0.002   |
| <b>Alcohol Use Disorders</b>                        |                       |                         |         |                           |         |
| HDI                                                 | 0.9                   | -6.4 to 8.2             | 0.3     | 0.04                      | 0.8     |
| GINI index                                          | -1.2                  | -6.7 to 4.4             | -0.4    | -0.07                     | 0.7     |
| Unemployment                                        | -0.05                 | -0.1 to 0.02            | -1.5    | -0.26                     | 0.1     |

Supplementary Table 3 continued

| Predictor                | Estimator coefficient | 95% Confidence interval | T value | Effect size (Pearson's r) | P value |
|--------------------------|-----------------------|-------------------------|---------|---------------------------|---------|
| <b>Suicide</b>           |                       |                         |         |                           |         |
| HDI                      | -3.2                  | -35.5 to 29.1           | -0.2    | -0.04                     | 0.8     |
| GINI index               | -18.8                 | -43.8 to 6.3            | -1.5    | -0.26                     | 0.1     |
| Unemployment             | -0.4                  | -0.6 to -0.09           | -2.7    | -0.43                     | 0.01    |
| <b>Bipolar Disorders</b> |                       |                         |         |                           |         |
| HDI                      | 1.4                   | -0.05 to 2.8            | 2.0     | 0.33                      | 0.06    |
| GINI index               | 0.5                   | -0.6 to 1.6             | 0.9     | 0.16                      | 0.4     |
| Unemployment             | 0.01                  | -0.001 to 0.02          | 1.8     | 0.30                      | 0.08    |

<sup>a</sup> this includes Autism Spectrum Disorders, ADHD, Conduct Disorders, Idiopathic developmental intellectual disability, Depressive disorders, Schizophrenia, Anxiety disorders, Eating disorder and Bipolar disorders.



**REFERENCES**

- 1 Maronna RA, Martin RD, Yohai VJ, Salibián-Barrera M. *Robust statistics: theory and methods (with R)*. John Wiley & Sons, 2019.
- 2 Koller M, Stahel WA. Sharpening wald-type inference in robust regression for small samples. *Comput Stat Data Anal* 2011; **55**: 2504–2515.

For peer review only

STROBE Statement—Checklist of items that should be included in reports of *cross-sectional studies*

|                              | Item No | Recommendation                                                                                                                                                                                               |
|------------------------------|---------|--------------------------------------------------------------------------------------------------------------------------------------------------------------------------------------------------------------|
| <b>Title and abstract</b>    | 1 ✓     | (a) Indicate the study's design with a commonly used term in the title or the abstract                                                                                                                       |
|                              | ✓       | (b) Provide in the abstract an informative and balanced summary of what was done and what was found                                                                                                          |
| <b>Introduction</b>          |         |                                                                                                                                                                                                              |
| Background/rationale         | 2 ✓     | Explain the scientific background and rationale for the investigation being reported                                                                                                                         |
| Objectives                   | 3 ✓     | State specific objectives, including any prespecified hypotheses                                                                                                                                             |
| <b>Methods</b>               |         |                                                                                                                                                                                                              |
| Study design                 | 4 ✓     | Present key elements of study design early in the paper                                                                                                                                                      |
| Setting                      | 5 ✓     | Describe the setting, locations, and relevant dates, including periods of recruitment, exposure, follow-up, and data collection                                                                              |
| Participants                 | 6 ✓     | (a) Give the eligibility criteria, and the sources and methods of selection of participants                                                                                                                  |
| Variables                    | 7 ✓     | Clearly define all outcomes, exposures, predictors, potential confounders, and effect modifiers. Give diagnostic criteria, if applicable                                                                     |
| Data sources/<br>measurement | 8* ✓    | For each variable of interest, give sources of data and details of methods of assessment (measurement). Describe comparability of assessment methods if there is more than one group                         |
| Bias                         | 9 ✓     | Describe any efforts to address potential sources of bias                                                                                                                                                    |
| Study size                   | 10 ✓    | Explain how the study size was arrived at                                                                                                                                                                    |
| Quantitative variables       | 11 ✓    | Explain how quantitative variables were handled in the analyses. If applicable, describe which groupings were chosen and why                                                                                 |
| Statistical methods          | 12 ✓    | (a) Describe all statistical methods, including those used to control for confounding                                                                                                                        |
|                              | ✓       | (b) Describe any methods used to examine subgroups and interactions                                                                                                                                          |
|                              | ✓       | (c) Explain how missing data were addressed                                                                                                                                                                  |
|                              | ✓       | (d) If applicable, describe analytical methods taking account of sampling strategy                                                                                                                           |
|                              | ✓       | (e) Describe any sensitivity analyses                                                                                                                                                                        |
| <b>Results</b>               |         |                                                                                                                                                                                                              |
| Participants                 | 13* ✓   | (a) Report numbers of individuals at each stage of study—eg numbers potentially eligible, examined for eligibility, confirmed eligible, included in the study, completing follow-up, and analysed            |
|                              | ✓       | (b) Give reasons for non-participation at each stage                                                                                                                                                         |
|                              | ✓       | (c) Consider use of a flow diagram                                                                                                                                                                           |
| Descriptive data             | 14* ✓   | (a) Give characteristics of study participants (eg demographic, clinical, social) and information on exposures and potential confounders                                                                     |
|                              | ✓       | (b) Indicate number of participants with missing data for each variable of interest                                                                                                                          |
| Outcome data                 | 15* ✓   | Report numbers of outcome events or summary measures                                                                                                                                                         |
| Main results                 | 16 ✓    | (a) Give unadjusted estimates and, if applicable, confounder-adjusted estimates and their precision (eg, 95% confidence interval). Make clear which confounders were adjusted for and why they were included |
|                              | ✓       | (b) Report category boundaries when continuous variables were categorized                                                                                                                                    |
|                              | ✓       | (c) If relevant, consider translating estimates of relative risk into absolute risk for a meaningful time period                                                                                             |
| Other analyses               | 17 ✓    | Report other analyses done—eg analyses of subgroups and interactions, and sensitivity analyses                                                                                                               |

1  
2  
3  
4  
5  
6  
7  
8  
9  
10  
11  
12  
13  
14  
15  
16  
17  
18  
19  
20  
21  
22  
23  
24  
25  
26  
27  
28  
29  
30  
31  
32  
33  
34  
35  
36  
37  
38  
39  
40  
41  
42  
43  
44  
45  
46  
47  
48  
49  
50  
51  
52  
53  
54  
55  
56  
57  
58  
59  
60

| <b>Discussion</b>        |      |                                                                                                                                                                            |
|--------------------------|------|----------------------------------------------------------------------------------------------------------------------------------------------------------------------------|
| Key results              | 18 ✓ | Summarise key results with reference to study objectives                                                                                                                   |
| Limitations              | 19 ✓ | Discuss limitations of the study, taking into account sources of potential bias or imprecision. Discuss both direction and magnitude of any potential bias                 |
| Interpretation           | 20 ✓ | Give a cautious overall interpretation of results considering objectives, limitations, multiplicity of analyses, results from similar studies, and other relevant evidence |
| Generalisability         | 21 ✓ | Discuss the generalisability (external validity) of the study results                                                                                                      |
| <b>Other information</b> |      |                                                                                                                                                                            |
| Funding                  | 22 ✓ | Give the source of funding and the role of the funders for the present study and, if applicable, for the original study on which the present article is based              |

\*Give information separately for exposed and unexposed groups.

**Note:** An Explanation and Elaboration article discusses each checklist item and gives methodological background and published examples of transparent reporting. The STROBE checklist is best used in conjunction with this article (freely available on the Web sites of PLoS Medicine at <http://www.plosmedicine.org/>, Annals of Internal Medicine at <http://www.annals.org/>, and Epidemiology at <http://www.epidem.com/>). Information on the STROBE Initiative is available at [www.strobe-statement.org](http://www.strobe-statement.org).

# BMJ Open

## An ecological study of the association between mental illness with human development, income inequalities and unemployment across OECD countries

|                                 |                                                                                              |
|---------------------------------|----------------------------------------------------------------------------------------------|
| Journal:                        | <i>BMJ Open</i>                                                                              |
| Manuscript ID                   | bmjopen-2019-035055.R1                                                                       |
| Article Type:                   | Original research                                                                            |
| Date Submitted by the Author:   | 18-Dec-2019                                                                                  |
| Complete List of Authors:       | Barbalat, Guillaume; CNRS & Université Lyon 1<br>Franck , Nicolas ; CNRS & Université Lyon 1 |
| <b>Primary Subject Heading</b>: | Epidemiology                                                                                 |
| Secondary Subject Heading:      | Mental health, Sociology, Global health                                                      |
| Keywords:                       | MENTAL HEALTH, EPIDEMIOLOGY, SOCIAL MEDICINE                                                 |
|                                 |                                                                                              |

SCHOLARONE™  
Manuscripts



I, the Submitting Author has the right to grant and does grant on behalf of all authors of the Work (as defined in the below author licence), an exclusive licence and/or a non-exclusive licence for contributions from authors who are: i) UK Crown employees; ii) where BMJ has agreed a CC-BY licence shall apply, and/or iii) in accordance with the terms applicable for US Federal Government officers or employees acting as part of their official duties; on a worldwide, perpetual, irrevocable, royalty-free basis to BMJ Publishing Group Ltd ("BMJ") its licensees and where the relevant Journal is co-owned by BMJ to the co-owners of the Journal, to publish the Work in this journal and any other BMJ products and to exploit all rights, as set out in our [licence](#).

The Submitting Author accepts and understands that any supply made under these terms is made by BMJ to the Submitting Author unless you are acting as an employee on behalf of your employer or a postgraduate student of an affiliated institution which is paying any applicable article publishing charge ("APC") for Open Access articles. Where the Submitting Author wishes to make the Work available on an Open Access basis (and intends to pay the relevant APC), the terms of reuse of such Open Access shall be governed by a Creative Commons licence – details of these licences and which [Creative Commons](#) licence will apply to this Work are set out in our licence referred to above.

Other than as permitted in any relevant BMJ Author's Self Archiving Policies, I confirm this Work has not been accepted for publication elsewhere, is not being considered for publication elsewhere and does not duplicate material already published. I confirm all authors consent to publication of this Work and authorise the granting of this licence.

1  
2 **TITLE PAGE**  
3  
4  
5

6 **Title:** An ecological study of the association between mental illness with human development,  
7  
8 income inequalities and unemployment across OECD countries.  
9

10  
11  
12  
13  
14 **Authors:** Guillaume BARBALAT, M.D., Ph.D.<sup>1</sup> & Nicolas FRANCK, M.D., Ph.D.<sup>1</sup>  
15

16 <sup>1</sup> Centre Ressource de Réhabilitation Psychosociale,  
17  
18 Centre Hospitalier le Vinatier & UMR 5229,  
19  
20 CNRS & Université Lyon 1,  
21  
22  
23 France  
24  
25  
26

27 **Corresponding author:**  
28

29 Guillaume Barbalat  
30  
31 Centre Ressource de Réhabilitation Psychosociale,  
32  
33 Centre Hospitalier le Vinatier & UMR 5229,  
34  
35 CNRS & Université Lyon 1,  
36  
37 France  
38  
39 +33 7 57 51 22 05  
40  
41 [guillaumebarbalat@gmail.com](mailto:guillaumebarbalat@gmail.com)  
42  
43  
44  
45

46 **Abstract word count:** 297.  
47

48 **Word count:** 3190 (excluding references, tables and acknowledgements).  
49  
50  
51  
52  
53  
54  
55  
56  
57  
58  
59  
60

## **ABSTRACT**

### **OBJECTIVES**

Recent studies have demonstrated worsened mental health in relatively highly developed countries impacted by social inequalities and unemployment. Here, we investigate (1) whether mental health issues are differently or similarly affected by these social factors; and (2) whether their effects on mental health are related or unrelated to each other.

### **SETTING**

Analysis at the country level amongst OECD (Organization for Economic Cooperation and Development) countries (N=36). Data on social indicators was collected from OECD and United Nations Development Programme (UNDP) databases. Data on the prevalence of mental issues was obtained from the Institute for Health Metrics and Evaluation (IHME)'s Global Burden of Disease (GBD) study 2017.

### **PARTICIPANTS**

No involvement of participants.

### **PRIMARY AND SECONDARY OUTCOME MEASURES**

Using linear regression models, we investigated the relative contribution played by human development (as measured by the Human Development Index - HDI), social inequalities (GINI index) and unemployment (unemployment rate) on the prevalence of 10 mental health issues. We then measured the relationship between the socio-economic factors' effects on mental issues using 2x2 Pearson's correlation test and Principal Component Analysis.

### **RESULTS**

First, the overall effect of each socio-economic factor on a combination of mental health disorders was large (r range: 0.51-0.76;  $p < 0.002$ ). However, the influence of social factors on mental health was relative to each mental issue (r range: -0.34 to 0.74). Second, the socio-economic factors' effects on mental health showed strong interdependence ( $r_{\text{HDI-GINI}} = 0.93$ ,  $r_{\text{HDI-unemploy}} = 0.81$ ,  $r_{\text{unemploy-}}$

1  
2  $r_{GINI}=0.84$ ;  $p<0.001$ . Principal component analysis demonstrated that the first principal component of  
3  
4 the three variables ( $r_{HDI}$ ,  $r_{GINI}$ ,  $r_{unemploy}$ ) explained 91.5% of the variance.  
5

## 6 **CONCLUSION**

7  
8  
9 These results implore a re-analysis of the socio-economic determinants of mental health where: 1)  
10  
11 the heterogeneity of mental health issues would be taken into account; and 2) each socio-  
12  
13 economic indicator's effect would be analysed and interpreted in conjunction with the others.  
14  
15  
16  
17  
18  
19  
20  
21  
22  
23  
24  
25  
26  
27  
28  
29  
30  
31  
32  
33  
34  
35  
36  
37  
38  
39  
40  
41  
42  
43  
44  
45  
46  
47  
48  
49  
50  
51  
52  
53  
54  
55  
56  
57  
58  
59  
60

For peer review only



## **STRENGTHS AND LIMITATIONS OF THIS STUDY**

- To allow for comparability across populations and minimize the risk of outliers, our study focused on OECD countries, which are mostly high-income countries.
- Data on the prevalence of 10 mental issues was obtained from the Institute for Health Metrics and Evaluation (IHME)'s Global Burden of Disease (GBD) study 2017, from which an increasing number of high-impact epidemiological studies has already been published.
- Our analysis took into account overall healthcare spending and potential outlier countries.
- The ecological design was necessary because our research questions were directly related to the association of national-level mental health prevalence and socio-economic indicators, however there is no possibility to make inferences about individuals from this dataset.
- The observational nature of our analysis means that other uncontrolled socio-cultural factors might have influenced the prevalence of mental issues in individual countries.

## MAIN TEXT

### INTRODUCTION

A significant proportion of the overall disease burden is related to mental disorders. For instance, depressive disorders and schizophrenia account for as much as 63200 and 15000 absolute Disability-Adjusted Life Year per thousand people, which makes them the second and the eleventh most burdensome disorders, respectively [1]. Suicide is also a serious global public health issue, being amongst the top twenty leading causes of death worldwide, and the second leading cause of death in young people aged 15-29 years [2]. Therefore, how to promote mental health at a wide, public health level is a crucial matter.

Following the bio-psycho-social account of mental disorders, one can say that mental health is currently promoted at 3 basic levels. First, the increasing knowledge of biological determinisms of mental illness has led to great efforts (but not necessarily successes) to destigmatise patients with a mental disorder that is beyond their control [3]. Second, psychological attributes such as confidence, agency, optimism, or resilience are now widely used to promote mental health at a public health level [4]. Third, important insights have revealed that discrimination based on socio-demographic factors such as socio-economic status, race, ethnicity, gender and sexual orientation can have a huge impact on mental health [5].

However, contrary to biological and psychological factors that are now routinely addressed by clinicians, practitioners keep struggling to meet their patients social needs. Recent accounts emphasize the need for a better awareness of the social, economical and political determinants of mental health amongst mental health practitioners [6]. Those accounts call for a better recognition of how structures (such as institutions, systems, or policies) bias social justice against certain types of people and shape symptoms and diseases – especially mental disorders. Recognizing factors that participate to structural discrimination in day-to-day practice would be crucial to advocate for the reduction of inequalities both in clinical interactions and, perhaps even more importantly, to

1  
2 promote better mental health at a public health level [7].  
3

4 In the current study, we chose to leave aside dimensions of structural discrimination related  
5 to race, gender, religion and sexual orientation to focus on country-level socio-economic status and  
6 its relationship to mental health disorders prevalence. We investigated 3 measures meant to define  
7 the social and economic status of a nation: human development, income inequalities and  
8 unemployment rate. Human development, which is composed by a measure of health, education  
9 and standard of living, aims at representing the average level of freedoms, opportunities and  
10 financial wealth of a country. Income inequalities gives insight on how wealth is distributed within a  
11 nation. Finally, unemployment rate measures the percentage of people without a professional  
12 occupation.  
13  
14  
15  
16  
17  
18  
19  
20  
21  
22

23  
24 Recent studies have suggested that relatively highly developed countries demonstrate  
25 worsened mental health when impacted by income inequalities [8–10] and unemployment [11].  
26 Although this has been of great interest to social epidemiologists, two important questions have  
27 remained unanswered. First, it is unclear whether mental health issues are differently or similarly  
28 affected by these social factors. International classifications such as the DSM or the ICD define  
29 mental disorders as a constellation of potential problems, rather than a single, unifying issue  
30 [12,13]. The question is therefore whether socio-economic indicators influence those various  
31 disorders in a different or similar manner. Given the heterogeneity of mental health problems, one  
32 would expect a differential impact of these social factors on various mental health issues, where for  
33 instance bipolar disorders would have a different relation to socio-economic indicators than  
34 schizophrenia or alcohol use disorders. On the other hand, recent accounts of mental issues have  
35 criticized the view that mental disorders were discriminable. Those accounts are based on clinical,  
36 biochemical, genetics, and cognitive neuroscience studies that have suggested fairly similar  
37 mechanisms underpinning different mental diseases such as schizophrenia, depression, anxiety  
38 disorders, and attention-deficit and hyperactivity disorders (ADHD) [14]. Following this account,  
39 one would expect that social factors would influence different mental disorders in a rather similar  
40 way.  
41  
42  
43  
44  
45  
46  
47  
48  
49  
50  
51  
52  
53  
54  
55  
56  
57  
58  
59  
60

1  
2 A second uncertainty is whether those socio-economic factors' effects on mental health are  
3 related or unrelated to each other. On the one hand, there are theoretical reasons to believe that  
4 those socio-economic factors may have a correlated impact on mental problems. A common path  
5 to mental well-being may be that of income, wealth and perhaps success, where development  
6 would relate to *average* wealth, inequalities to wealth *distribution* and unemployment to the main  
7 *source* of wealth for most people. On the other hand however, development, inequalities and  
8 unemployment usually vary in a way that is grossly uncorrelated [15]. Thus, according to this  
9 account, there is no *a priori* empirical reason to suspect that their effects on mental health are  
10 related to each other.  
11  
12  
13  
14  
15  
16  
17  
18  
19

20  
21 This study aimed at better categorizing the relations between development, inequalities,  
22 and unemployment with the prevalence of various mental health issues at the country level. To  
23 allow for comparability across populations and minimize the risk of outliers, we restricted our  
24 analyses to the 36 relatively rich countries that belong to the Organization for Economic  
25 Cooperation and Development (OECD). This choice is based on the fact that, in developing  
26 countries, mental disorders could rely on other social factors than the ones we investigated in the  
27 current study, such as human rights and inland security [16]. Likewise, there seems to be key  
28 differences between developing and developed countries in how human development affects  
29 mental health. While the prevalence of mental disorders such as depression decreases when the  
30 level of human development increases, developed countries seem to demonstrate an opposite  
31 pattern: the higher their level of development, the higher their prevalence of mental disorders [17].  
32  
33  
34  
35  
36  
37  
38  
39  
40  
41  
42  
43  
44

45 We restricted our analysis to the most common mental health disorders, that is, depressive  
46 disorders, bipolar disorders, schizophrenia, eating disorders, anxiety disorders, ADHD, alcohol use  
47 disorders, and autism spectrum disorders. As an obvious public mental health issue, we also  
48 added suicide prevalence to our analysis. Two caveats are related to the collection of prevalence  
49 data on mental disorders across countries. First, the range of epidemiological studies meant to  
50 report prevalence data are unequally distributed across issues, age groups and countries [18]. To  
51 overcome this challenge, we chose to collect data on the prevalence of mental health disorders  
52  
53  
54  
55  
56  
57  
58  
59  
60

1 from the Institute of Health Metrics & Evaluation (IHME)'s Global Burden of Disease (GBD) study  
2  
3 2017 [19]. To the best of our knowledge, this is currently the only source which produces global  
4  
5 level estimates across countries where diagnostic categories for mental health and alcohol use  
6  
7 disorders are adequately represented. Second, prevalence data could reflect, at least in part,  
8  
9 different healthcare spending across countries rather than giving a representative perspective on  
10  
11 specific differences between countries. Countries that spend a lot on healthcare would likely show  
12  
13 inflated prevalence as a result of an increased focus on mental health disorders. To overcome this  
14  
15 bias, we decided to run a second set of analysis taking into account overall healthcare spending  
16  
17 and check if results from both analyses are comparable.  
18  
19  
20  
21  
22  
23

## 24 **METHODS**

### 25 **Data series**

#### 26 Dependent variable

27  
28  
29 Prevalences of mental health issues across OECD countries were collected from the Institute of  
30  
31 Health Metrics & Evaluation (IHME)'s Global Burden of Disease (GBD) project database [19],  
32  
33 where data is estimated from a combination of surveys, medical and epidemiological data, as well  
34  
35 as meta-regression models. Data from the GBD study 2017 was released in November 2018, and  
36  
37 concern years 1990-2017. The GBD study 2017 defines prevalence as the proportion of people in  
38  
39 a population who are a case of a disease, injury or sequela. All results in GBD refer to point  
40  
41 prevalence.  
42  
43  
44  
45  
46

47 Data was extracted for year 2017 for a combination of mental health disorders and the  
48  
49 specific following issues: depressive disorders, anxiety disorders, schizophrenia, bipolar disorders,  
50  
51 eating disorders, alcohol use disorders, ADHD, autism spectrum disorders and suicide (**Table 1**).  
52  
53 Note that suicide did not include non-fatal self-harm.  
54  
55

56 Prevalence data was age standardized, which allowed comparability across populations  
57  
58 when their age profiles were different. Data was calculated in relation to the entire population.  
59  
60

1  
2 Extracted data did not necessitate any further transformation and was ready to be used.  
3  
4  
5  
6

### 7 Independent variables

8

9 Each country's level of human development was measured with the Human Development Index  
10 (HDI; range: 0-1). The HDI summarizes life expectancy, a combination of adult literacy rate and  
11 school enrolment rate, and gross domestic product per capita at purchasing power parity [20].  
12  
13  
14

15  
16 For each country, income inequality was measured using the GINI index (range: 0-1), which  
17 intends to represent a nation's income distribution [21]. A GINI coefficient of 0 means that the  
18 country income is perfectly equally distributed. A GINI coefficient of 1 means that all the country's  
19 income is received by just one person.  
20  
21  
22

23  
24 Our third socio-economic indicator was unemployment rate, which measures the rate of  
25 unemployment as a percentage of the labour force [22].  
26  
27  
28

29 Data for the three predictors was collected from the OECD database except for HDI, which  
30 was retrieved from the United Nations Development Programme database (**Table 1**). Data was  
31 extracted for year 2016, except when unavailable, in which case data was extracted for the closest  
32 year previous to 2016 (year range for data collection: 2014-2016).  
33  
34  
35  
36

37  
38 Source data for all 36 OECD countries can be found as a supplementary file (all\_data.pdf).  
39 There was no missing data. For each indicator (dependent and independent variables), atypical  
40 countries were defined as having a z-score greater than 3 or below -3 (**Table 1**).  
41  
42  
43  
44  
45  
46  
47

48 -----  
49  
50 *Table 1 about here*  
51  
52  
53 -----  
54  
55  
56  
57  
58  
59  
60

## Statistical Analysis

We ran multiple regression linear models where the prevalence of a mental issue across OECD countries is predicted by the HDI, GINI index, and unemployment rate. Extreme outliers were defined as data points with Cook's distance  $> 1$  [23]. Using this cut-off, we were not able to identify any outliers when running our linear models.

For each mental health issue, we then converted each of the socio-economic indicators' t statistic into their corresponding effect size (Pearson's  $r_{\text{HDI}}$ ,  $r_{\text{GINI}}$ ,  $r_{\text{unemploy}}$ ). We then computed 2x2 Pearson's correlation coefficients between those 3 variables ( $r_{\text{HDI-GINI}}$ ,  $r_{\text{HDI-unemploy}}$ ,  $r_{\text{unemploy-GINI}}$ ) to estimate their pairwise relationships across all mental health problems. Finally, to investigate the linear dependency between the 3 indicators' effect sizes, we ran principal component analysis and obtained explained variance for the first principal component.

An important caveat when collecting mental health data at the country level is that prevalence could reflect healthcare spending (which allows for more focus on mental health disorders) rather than giving a representative perspective on differences between countries. For our data, Pearson's  $r$  between combined mental health disorders prevalence and healthcare spending as measured by price per capita at purchasing power parity (obtained from the OECD database [24]) was of 0.58 ( $p < 0.001$ ). To check that our results were not impacted by overall healthcare expenditures, we decided to regress out the influence of healthcare spending on the prevalence of each mental health issue and to re-run our analysis using the residuals as dependent variables. Finally, to check that our results were not too influenced by outliers, we also ran our analysis using robust regression methods.

To run these analyses, we used R 3.6.1.

## Patient and public involvement

No patients were involved in this study.

## RESULTS

Multiple linear regression models performed on the prevalence of a combination of mental health disorders revealed that the effect of development ( $r_{\text{HDI}}$ ), inequalities ( $r_{\text{GINI}}$ ) and unemployment ( $r_{\text{unemploy}}$ ) was large ( $r$  range: 0.51-0.76). However they demonstrated great variation when measured amongst different mental health issues ( $r$  range: -0.34 to 0.74; **Table 2 and Supplementary Table 1**), the most prominent being no positive effect on suicide and alcohol use disorders, and a larger effect on other mental disorders. Regarding the latter, development had a strong effect ( $r > 0.65$ ) on the prevalence of each disorder apart from bipolar disorders and ADHD ( $r < 0.43$ ); income inequalities had at least a moderate effect ( $r > 0.40$ ) on the prevalence of each disorder apart from bipolar disorders and ADHD ( $r < 0.30$ ); and unemployment had a moderate effect on depressive and eating disorders ( $r > 0.42$ ), and only a small effect on autism spectrum disorders and schizophrenia ( $r < 0.18$ ) (**Table 2**).

Across mental issues, the socio-economic indicators' effect sizes were strongly related to each other (Pearson's  $r_{\text{HDI-GINI}}=0.93$ ,  $r_{\text{HDI-unemploy}}=0.81$ ,  $r_{\text{unemploy-GINI}}=0.84$ ). Principal component analysis demonstrated that the first principal component of the three variables ( $r_{\text{HDI}}$ ,  $r_{\text{GINI}}$ ,  $r_{\text{unemploy}}$ ) explained 91.5% of the variance ( $p=0$ , permutation test with 1000 repetitions).

-----  
*Table 2 about here*  
-----

Finally, note that re-running our analysis after controlling for overall healthcare spending across countries and using robust method to control for outliers clearly reproduced this pattern of results (**Supplementary Results; Supplementary Tables 2 and 3**).



## DISCUSSION

This study aimed at clarifying the relationship between mental health and three socio-economic factors: human development, income inequalities and unemployment. We first demonstrated that, amongst OECD countries, the strength of the relationship between the prevalence of mental health issues with development, inequalities and unemployment, was large for a combination of disorders. This confirms the abundant literature showing a positive association between mental issues with inequalities [9] and unemployment [25,26] for a whole range of mental disorders. More generally, the social science literature is unequivocal as per the association between a country's socio-economic status and health across the life span. Indeed, other studies have demonstrated a strong impact of socio-ecological measures of wealth (e.g. salary, pension), income inequalities, education, and employment on overall health outcomes such as life expectancy, healthy life expectancy, and adolescent health [27–31]. Taking this a step further, our study adds one more argument for the implementation of public health policies expected to counter the devastating effect of inequalities and unemployment [10,32,33].

Aside from the effect of inequalities and unemployment on mental health, that of human development is less straightforward. On the one hand, research has shown that development was accompanied with better mental health [34]. Human development clearly promotes health and wellbeing, for instance by reducing mortality due to infectious diseases thanks to vaccination programmes and antibiotics use; but also by encouraging education, innovations, freedom and opportunities. On the other hand, others have demonstrated an opposite relationship between mental health and human development, with mental disorders prevalence paradoxically increasing with the level of human development [17]. The relationship between human development and mental health found in the current study was clearly of that kind, and this relationship was not related to overall healthcare spending. Some have interpreted this deleterious effect of development on mental health as a potential reflection of the mutation of social values towards less social integration and regulation in modern societies [35,36]. In fact, the relationship between human development and mental health disorders prevalence may follow a U-shape curve, with a

1  
2 negative relationship (less mental disorders when development increases) for developing  
3  
4 countries, and a positive relationship (more mental disorders when development increases) for  
5  
6 developed countries. Further studies should continue to investigate this association at a more fine-  
7  
8 grained level, using for instance multilevel models, to better decipher the effect of human  
9  
10 development on mental health in developing and developed countries.  
11

12  
13 In the current study, we were also interested in whether the association between mental  
14  
15 health with human development, income inequalities, and unemployment varies across mental  
16  
17 issues; and whether the three socio-economic factors' effects on mental health are related to each  
18  
19 other. As a second important result of our study, we demonstrated that the association between  
20  
21 mental issues and the three socio-economic factors was in fact relative to each mental health  
22  
23 issue. Non-addictive mental health disorders tested in this study were clearly associated to these  
24  
25 social factors, though to various degrees. Hypotheses on how each of those mental issues  
26  
27 specifically relies to development, inequalities and unemployment are beyond the scope of this  
28  
29 study and are open to further empirical testing. In contrast, development, inequalities and  
30  
31 unemployment did not negatively impact suicide and alcohol use disorders. This seems to  
32  
33 contradict within-country studies that have demonstrated that inequalities and unemployment both  
34  
35 affect suicide and alcohol use disorders prevalence [37–41]. In fact, both issues are also thought to  
36  
37 be strongly influenced by other socio-cultural factors that vary independently from development,  
38  
39 inequalities and unemployment. For instance, long-term unemployment [42] or work stress [43]  
40  
41 have been associated to suicide, while religion [44,45], connectedness and neighbourhood  
42  
43 conditions [46] are known protective factors against extreme behaviours. Overall, those additional  
44  
45 factors, untested in this study, may have masked the effect of development, inequalities and  
46  
47 unemployment on suicide and alcohol use.  
48  
49

50  
51 A third important finding of our study is that the socio-economic factors' effects on mental  
52  
53 health are strongly related to each other. This suggests that they share an underlying common  
54  
55 pathway. As such, they could pertain to a so-called social structure that would influence and  
56  
57 restrict the choices and opportunities available to people [47] and tend to bias an overall society  
58  
59  
60

1  
2 towards better, or worse, mental health. In modern societies, development, inequalities and  
3  
4 unemployment can all be viewed as indicators of key cultural values and norms important for social  
5  
6 inclusion and cohesion. Such values and norms participate to some of the core features of  
7  
8 capitalist systems: accumulation, competition and labour wages. That is, a high level of  
9  
10 development sets priorities for people to reach a high threshold of desired outcomes in terms of  
11  
12 education, health or financial wealth [48]. Likewise, greater income inequalities can shape attitudes  
13  
14 towards reaching a higher social position compared to others [49]. Finally, the value of an  
15  
16 employment position in this context is both material (it gives a source of income) and socio-cultural  
17  
18 (not having a job is typically perceived as being a failure in the society). Overall, these social  
19  
20 factors' unifying feature may be their underlying pressure for success, which in turn could explain  
21  
22 their negative impact on mental health.  
23  
24  
25  
26  
27

## 28 **Limitations**

29  
30 First, because our research questions were directly related to the association of national-level  
31  
32 mental health prevalence and socio-economic indicators, we considered the ecological design the  
33  
34 most appropriate for our study [8]. However, the observational nature of our analysis implies that  
35  
36 other uncontrolled socio-cultural factors might have influenced the prevalence of mental issues in  
37  
38 individual countries. We obviously need to be careful about any over-interpretation of our results as  
39  
40 demonstrating causality while our models can only be predictive.  
41  
42  
43

44 A second potential limitation of this study is the so-called ecological fallacy, that is, making  
45  
46 inferences on individual risk from analysis made on aggregate data [50]. Based on this study  
47  
48 results, one cannot draw conclusions about the specific nature of individuals (e.g. their socio-  
49  
50 economic status) who suffer from mental health issues. To solve this question, one would need to  
51  
52 design a multilevel study where socio-economic status at the individual level and at the country  
53  
54 level would be entered as two-level predictors.  
55  
56

57 Third, it is likely that the effect of development, inequalities, and unemployment is different  
58  
59 across non-OECD countries and especially low and middle income countries. For instance, and as  
60

1 mentioned above, human development would have more of a beneficial effect on mental health in  
2 such developing countries [34]. That said, as most of the European and North American  
3  
4  
5  
6  
7  
8  
9  
10  
11  
12  
13  
14  
15  
16  
17  
18  
19  
20  
21  
22  
23  
24  
25  
26  
27  
28  
29  
30  
31  
32  
33  
34  
35  
36  
37  
38  
39  
40  
41  
42  
43  
44  
45  
46  
47  
48  
49  
50  
51  
52  
53  
54  
55  
56  
57  
58  
59  
60

## Conclusion

Despite those limitations, these results implore a re-analysis of the socio-economic determinants of mental health where: 1) the heterogeneity of mental health issues would be taken into account; and 2) each socio-economic indicator's effect would be analysed and interpreted in conjunction with the others.

## DECLARATION OF INTEREST

The authors have no biomedical financial interests or potential conflicts of interest.

## FUNDING

This research received no specific grant from any funding agency, commercial or not-for-profit sectors.

## AUTHOR CONTRIBUTION

All authors were involved in drafting the article or revising it critically for important intellectual content, and have read and approved the final version of the manuscript. G.B. and N.F. designed the study. G.B. gathered the data. G.B. and N.F. analysed the data and wrote the paper.

## DATA AVAILABILITY

All data relevant to the study are available as supplementary information.

**REFERENCES**

- 1 Silberberg D, Anand NP, Michels K, *et al*. Brain and other nervous system disorders across the lifespan—global challenges and opportunities. *Nature* 2015;**527**:S151.
- 2 World Health Organization. Suicide in the world: global health estimates. World Health Organization 2019.
- 3 Schomerus G, Schwahn C, Holzinger A, *et al*. Evolution of public attitudes about mental illness: a systematic review and meta-analysis. *Acta Psychiatr Scand* 2012;**125**:440–452.
- 4 Kobau R, Seligman ME, Peterson C, *et al*. Mental health promotion in public health: Perspectives and strategies from positive psychology. *Am J Public Health* 2011;**101**:e1–e9.
- 5 Bourgois P, Holmes SM, Sue K, *et al*. Structural vulnerability: operationalizing the concept to address health disparities in clinical care. *Acad Med J Assoc Am Med Coll* 2017;**92**:299.
- 6 Metzl JM, Hansen H. Structural competency and psychiatry. *JAMA Psychiatry* 2018;**75**:115–116.
- 7 Metzl JM, Petty J, Olowojoba OV. Using a structural competency framework to teach structural racism in pre-health education. *Soc Sci Med* 2018;**199**:189–201.
- 8 Wilkinson RG, Pickett KE. Income inequality and social dysfunction. *Annu Rev Sociol* 2009;**35**:493–511.
- 9 Ribeiro WS, Bauer A, Andrade MCR, *et al*. Income inequality and mental illness-related morbidity and resilience: a systematic review and meta-analysis. *Lancet Psychiatry* 2017;**4**:554–562.
- 10 Patel V, Burns JK, Dhingra M, *et al*. Income inequality and depression: a systematic review and meta-analysis of the association and a scoping review of mechanisms. *World Psychiatry* 2018;**17**:76–89.
- 11 Stuckler D, Basu S, Suhrcke M, *et al*. The public health effect of economic crises and alternative policy responses in Europe: an empirical analysis. *The Lancet* 2009;**374**:315–323.
- 12 American Psychiatric Association. *Diagnostic and statistical manual of mental disorders (DSM-5®)*. American Psychiatric Pub 2013.
- 13 World Health Organization. *The ICD-10 classification of mental and behavioural disorders: clinical descriptions and diagnostic guidelines*. Geneva: World Health Organization 1992.
- 14 Fried EI. Problematic assumptions have slowed down depression research: why symptoms, not syndromes are the way forward. *Front Psychol* 2015;**6**:309.
- 15 Ranis G, Stewart F, Samman E. Human development: beyond the human development index. *J Hum Dev* 2006;**7**:323–358.
- 16 Joop TV, De Jong M. Public mental health, traumatic stress and human rights violations in low-income countries. In: *Trauma, war, and violence: Public mental health in socio-cultural context*. Springer 2002. 1–91.
- 17 Cifuentes M, Sembajwe G, Tak S, *et al*. The association of major depressive episodes with income inequality and the human development index. *Soc Sci Med* 2008;**67**:529–539.

- 1  
2 18 Whiteford H, Ferrari A, Degenhardt L. Global burden of disease studies: implications for mental  
3 and substance use disorders. *Health Aff (Millwood)* 2016;**35**:1114–1120.  
4
- 5 19 Global Burden of Disease Collaborative Network. Global Burden of Disease Study 2017 (GBD  
6 2017) Incidence, Prevalence, and Years Lived with Disability 1990-2017. Seattle, United  
7 States: Institute for Health Metrics and Evaluation (IHME), 2018.  
8 [https://www.google.com/search?q=Global+Burden+of+Disease+Collaborative+Network.+Global+Burden+of+Disease+Study+2017+\(GBD+2017\)+Incidence%2C+Prevalence%2C+and+Years+Lived+with+Disability+1990-2017.+Seattle%2C+United+States%3A+Institute+for+Health+Metrics+and+Evaluation+\(IHME\)%2C+2018.&rlz=1C1CHBD\\_enNZ738NZ739&oq=Global+Burden+of+Disease+Collaborative+Network.+Global+Burden+of+Disease+Study+2017+\(GBD+2017\)+Incidence%2C+Prevalence%2C+and+Years+Lived+with+Disability+1990-2017.+Seattle%2C+United+States%3A+Institute+for+Health+Metrics+and+Evaluation+\(IHME\)%2C+2018.&aqs=chrome..69i57.260j0j4&sourceid=chrome&ie=UTF-8](https://www.google.com/search?q=Global+Burden+of+Disease+Collaborative+Network.+Global+Burden+of+Disease+Study+2017+(GBD+2017)+Incidence%2C+Prevalence%2C+and+Years+Lived+with+Disability+1990-2017.+Seattle%2C+United+States%3A+Institute+for+Health+Metrics+and+Evaluation+(IHME)%2C+2018.&rlz=1C1CHBD_enNZ738NZ739&oq=Global+Burden+of+Disease+Collaborative+Network.+Global+Burden+of+Disease+Study+2017+(GBD+2017)+Incidence%2C+Prevalence%2C+and+Years+Lived+with+Disability+1990-2017.+Seattle%2C+United+States%3A+Institute+for+Health+Metrics+and+Evaluation+(IHME)%2C+2018.&aqs=chrome..69i57.260j0j4&sourceid=chrome&ie=UTF-8)  
9  
10  
11  
12  
13  
14  
15  
16  
17
- 18 20 United Nations Development Programme. Human Development Index. U. N. Hum. Dev. Rep.  
19 2019.<http://hdr.undp.org/en/indicators/137506#>  
20
- 21 21 the OECD. Income inequality. OECD Data. [http://data.oecd.org/inequality/income-](http://data.oecd.org/inequality/income-inequality.htm)  
22 [inequality.htm](http://data.oecd.org/inequality/income-inequality.htm)  
23
- 24 22 the OECD. Unemployment rate. OECD Data. [http://data.oecd.org/unemp/unemployment-](http://data.oecd.org/unemp/unemployment-rate.htm)  
25 [rate.htm](http://data.oecd.org/unemp/unemployment-rate.htm)  
26
- 27 23 Cook RD. Detection of influential observation in linear regression. *Technometrics* 1977;**19**:15–  
28 18.  
29
- 30 24 the OECD. Health spending. OECD Data. <http://data.oecd.org/healthres/health-spending.htm>  
31 (accessed 21 Sep 2019).  
32
- 33 25 Paul KI, Moser K. Unemployment impairs mental health: Meta-analyses. *J Vocat Behav*  
34 2009;**74**:264–282.  
35
- 36 26 Artazcoz L, Benach J, Borrell C, *et al*. Unemployment and Mental Health: Understanding the  
37 Interactions Among Gender, Family Roles, and Social Class. *Am J Public Health* 2004;**94**:82–  
38 8. doi:10.2105/AJPH.94.1.82  
39
- 40 27 Kim JI, Kim G. Effects on inequality in life expectancy from a social ecology perspective. *BMC*  
41 *Public Health* 2018;**18**:243.  
42
- 43 28 Kim JI, Kim G. Socio-ecological perspective of older age life expectancy: income, gender  
44 inequality, and financial crisis in Europe. *Glob Health* 2017;**13**:58.  
45
- 46 29 Kim JI, Kim G. Relationship between the remaining years of healthy life expectancy in older  
47 age and National Income Level, educational attainment, and improved water quality. *Int J*  
48 *Ageing Hum Dev* 2016;**83**:402–417.  
49
- 50 30 Kim JI, Kim G. Labor force participation and secondary education of gender inequality index  
51 (GII) associated with healthy life expectancy (HLE) at birth. *Int J Equity Health* 2014;**13**:106.  
52
- 53 31 Elgar FJ, Pfortner T-K, Moor I, *et al*. Socioeconomic inequalities in adolescent health 2002–  
54 2010: a time-series analysis of 34 countries participating in the Health Behaviour in School-  
55 aged Children study. *The Lancet* 2015;**385**:2088–2095.  
56
- 57 32 Pickett KE, Wilkinson RG. *Immorality of inaction on inequality*. British Medical Journal  
58  
59

1  
2  
3  
4  
5  
6  
7  
8  
9  
10  
11  
12  
13  
14  
15  
16  
17  
18  
19  
20  
21  
22  
23  
24  
25  
26  
27  
28  
29  
30  
31  
32  
33  
34  
35  
36  
37  
38  
39  
40  
41  
42  
43  
44  
45  
46  
47  
48  
49  
50  
51  
52  
53  
54  
55  
56  
57  
58  
59  
60

Publishing Group 2017.

- 33 Friedman EA, Gostin LO, Kavanagh MM, *et al.* Putting health equity at heart of universal coverage-the need for national programmes of action. *BMJ* 2019;**367**:l5901. doi:10.1136/bmj.l5901
- 34 Lund C, Breen A, Flisher AJ, *et al.* Poverty and common mental disorders in low and middle income countries: A systematic review. *Soc Sci Med* 2010;**71**:517–528.
- 35 Böhnke P. Poverty and social integration in the enlarged Europe. WZB Discussion Paper 2007.
- 36 Lester BY. Learnings from Durkheim and beyond: the economy and suicide. *Suicide Life Threat Behav* 2001;**31**:15–31.
- 37 Elgar FJ, Roberts C, Parry-Langdon N, *et al.* Income inequality and alcohol use: a multilevel analysis of drinking and drunkenness in adolescents in 34 countries. *Eur J Public Health* 2005;**15**:245–50. doi:10.1093/eurpub/cki093
- 38 Lorant V, Kunst AE, Huisman M, *et al.* Socio-economic inequalities in suicide: A European comparative study. *Br J Psychiatry* 2005;**187**:49–54. doi:10.1192/bjp.187.1.49
- 39 Janlert U, Hammarström A. Alcohol consumption among unemployed youths: results from a prospective study. *Br J Addict* 1992;**87**:703–14. doi:10.1111/j.1360-0443.1992.tb02716.x
- 40 Kposowa AJ. Unemployment and suicide: a cohort analysis of social factors predicting suicide in the US National Longitudinal Mortality Study. *Psychol Med* 2001;**31**:127–38. doi:10.1017/S0033291799002925
- 41 Reeves A, McKee M, Stuckler D. Economic suicides in the Great Recession in Europe and North America. *Br J Psychiatry* 2014;**205**:246–7. doi:10.1192/bjp.bp.114.144766
- 42 Milner A, Page A, LaMontagne AD. Duration of unemployment and suicide in Australia over the period 1985–2006: an ecological investigation by sex and age during rising versus declining national unemployment rates. *J Epidemiol Community Health* 2013;**67**:237–44. doi:10.1136/jech-2012-201594
- 43 Boxer PA, Burnett C, Swanson N. Suicide and occupation: a review of the literature. *J Occup Environ Med* 1995;**37**:442–52.
- 44 Kleiman EM, Liu RT. Prospective prediction of suicide in a nationally representative sample: religious service attendance as a protective factor. *Br J Psychiatry* 2014;**204**:262–6. doi:10.1192/bjp.bp.113.128900
- 45 Hodge DR, Cardenas P, Montoya H. Substance use: Spirituality and religious participation as protective factors among rural youths. *Soc Work Res* 2001;**25**:153–61. doi:10.1093/swr/25.3.153
- 46 Oman RF, Vesely SK, Aspy CB, *et al.* A Longitudinal Study of Youth Assets, Neighborhood Conditions, and Youth Sexual Behaviors. *J Adolesc Health* 2013;**52**:779–85. doi:10.1016/j.jadohealth.2012.12.005
- 47 Barker C. *The Sage dictionary of cultural studies*. Sage 2004.
- 48 James O. *Affluenza—a contagious middle class virus causing depression, anxiety, addiction and ennui*. Random House, London 2007.

1  
2 49 Pickett K, Wilkinson R. *The Spirit Level: Why Equality is Better for Everyone*. Penguin UK  
3 2010.

4  
5 50 Piantadosi S, Byar DP, Green SB. The ecological fallacy. *Am J Epidemiol* 1988;**127**:893–904.  
6  
7  
8  
9  
10  
11  
12  
13  
14  
15  
16  
17  
18  
19  
20  
21  
22  
23  
24  
25  
26  
27  
28  
29  
30  
31  
32  
33  
34  
35  
36  
37  
38  
39  
40  
41  
42  
43  
44  
45  
46  
47  
48  
49  
50  
51  
52  
53  
54  
55  
56  
57  
58  
59  
60

For peer review only



**TABLES****Table 1. Descriptive statistics for dependent and independent variables (N=36).**

| Variable                                                        | Range       | Mean  | Population-weighted mean | Standard Deviation | Atypical countries <sup>b</sup> |
|-----------------------------------------------------------------|-------------|-------|--------------------------|--------------------|---------------------------------|
| Prevalence of combined mental health disorders <sup>a</sup> (%) | 10.87-18.71 | 14.28 | 14.76                    | 2.13               | None                            |
| Prevalence of Autism Spectrum Disorders (%)                     | 0.36-0.94   | 0.60  | 0.65                     | 0.12               | None                            |
| Prevalence of ADHD (%)                                          | 0.43-2.53   | 1.15  | 1.13                     | 0.40               | Australia (2.53%)               |
| Prevalence of Depressive Disorders (%)                          | 2.25-4.84   | 3.71  | 3.89                     | 0.65               | None                            |
| Prevalence of Schizophrenia (%)                                 | 0.20-0.36   | 0.26  | 0.28                     | 0.05               | None                            |
| Prevalence of Anxiety Disorders (%)                             | 2.94-8.50   | 4.93  | 5.19                     | 1.46               | None                            |
| Prevalence of Eating Disorders (%)                              | 0.23-0.94   | 0.48  | 0.48                     | 0.18               | None                            |
| Prevalence of Alcohol Use Disorders (%)                         | 0.46-4.71   | 1.84  | 1.56                     | 0.99               | None                            |
| Prevalence of Suicide (per 100.000)                             | 3.31-27.99  | 10.89 | 10.66                    | 4.75               | Lithuania (27.99 per 100.000)   |
| Prevalence of Bipolar Disorders (%)                             | 0.57-1.21   | 0.86  | 0.79                     | 0.15               | None                            |
| HDI                                                             | 0.77-0.95   | 0.89  | 0.89                     | 0.04               | None                            |
| GINI index                                                      | 0.24-0.46   | 0.32  | 0.36                     | 0.05               | None                            |
| Unemployment rate (%)                                           | 2.97-23.54  | 7.41  | 6.46                     | 4.20               | Greece (23.54%)                 |

<sup>a</sup> this includes Autism Spectrum Disorders, ADHD, Conduct Disorders, Idiopathic developmental intellectual disability, Depressive disorders, Schizophrenia, Anxiety disorders, Eating disorder and Bipolar disorders.

<sup>b</sup> whose z-score is greater than 3 or below -3.

**Table 2: Effects of human development, income inequalities and unemployment on the prevalence of 10 mental health issues across OECD countries (N=36).**

| Pearson's r           | Combined | ASD  | ADHD | DEP  | SCZ  | ANX  | ED   | ETOH  | SUICIDE | BD   |
|-----------------------|----------|------|------|------|------|------|------|-------|---------|------|
| $r_{\text{HDI}}$      | 0.76     | 0.74 | 0.21 | 0.68 | 0.72 | 0.65 | 0.74 | -0.27 | -0.07   | 0.43 |
| $r_{\text{GINI}}$     | 0.59     | 0.46 | 0.30 | 0.59 | 0.49 | 0.40 | 0.45 | -0.10 | -0.07   | 0.14 |
| $r_{\text{unemploy}}$ | 0.51     | 0.15 | 0.27 | 0.42 | 0.18 | 0.29 | 0.45 | -0.18 | -0.34   | 0.30 |

“Combined”: combination of Autism Spectrum Disorders, Attention-Deficit/Hyperactivity Disorders, Conduct Disorders, Idiopathic developmental intellectual disability, Depressive disorders, Schizophrenia, Anxiety disorders, Eating disorder and Bipolar disorders; “ASD”: Autism Spectrum Disorders; “ADHD”: Attention-Deficit/Hyperactivity Disorders; “DEP”: Depressive Disorders; “SCZ”: Schizophrenia; “ANX”: Anxiety Disorders; “ED”: Eating Disorders; “ETOH”: Alcohol Use Disorders; “SUICIDE”: suicide rates; “BD”: Bipolar Disorders.

## Sheet1

|    | COUNTRIES | Healthcare_2016 (\$ per capita) | Population_2017 | HDI_2016 | GINI_2014-2016 |
|----|-----------|---------------------------------|-----------------|----------|----------------|
| 1  |           |                                 |                 |          |                |
| 2  |           |                                 |                 |          |                |
| 3  |           |                                 |                 |          |                |
| 4  |           |                                 |                 |          |                |
| 5  | AUS       | 4565.873                        | 24585000        | 0.938    | 0.33           |
| 6  | AUT       | 5139.924                        | 8820000         | 0.906    | 0.284          |
| 7  | BEL       | 4666.226                        | 11420000        | 0.915    | 0.266          |
| 8  | CAN       | 4698.016                        | 36732000        | 0.922    | 0.307          |
| 9  | CZE       | 2627.698                        | 10641000        | 0.885    | 0.253          |
| 10 | DNK       | 4774.269                        | 5732000         | 0.928    | 0.263          |
| 11 | FIN       | 4024.49                         | 5511000         | 0.918    | 0.259          |
| 12 | FRA       | 4844.017                        | 64843000        | 0.899    | 0.291          |
| 13 | DEU       | 5550.175                        | 82658000        | 0.934    | 0.294          |
| 14 | GRC       | 2198.044                        | 10569000        | 0.868    | 0.333          |
| 15 | HUN       | 1965.018                        | 9730000         | 0.835    | 0.288          |
| 16 | ISL       | 3916.333                        | 334000          | 0.933    | 0.255          |
| 17 | IRL       | 4470.748                        | 4753000         | 0.934    | 0.297          |
| 18 | ITA       | 3264.368                        | 60674000        | 0.878    | 0.328          |
| 19 | JPN       | 4512.845                        | 127503000       | 0.907    | 0.339          |
| 20 | KOR       | 2678.23                         | 51096000        | 0.9      | 0.355          |
| 21 | LUX       | 4785.896                        | 592000          | 0.904    | 0.304          |
| 22 | MEX       | 1065.875                        | 124777000       | 0.772    | 0.458          |
| 23 | NLD       | 5018.406                        | 17021000        | 0.928    | 0.285          |
| 24 | NZL       | 3662.218                        | 4702000         | 0.915    | 0.349          |
| 25 | NOR       | 5803.702                        | 5296000         | 0.951    | 0.262          |
| 26 | POL       | 1915.052                        | 37953000        | 0.86     | 0.284          |
| 27 | PRT       | 2667.691                        | 10289000        | 0.845    | 0.331          |
| 28 | SVK       | 2187.367                        | 5448000         | 0.853    | 0.241          |
| 29 | ESP       | 3105.646                        | 46647000        | 0.889    | 0.341          |
| 30 | SWE       | 5048.876                        | 9905000         | 0.932    | 0.282          |
| 31 | CHE       | 6942.187                        | 8456000         | 0.943    | 0.296          |
| 32 | TUR       | 1126.755                        | 81116000        | 0.787    | 0.404          |
| 33 | GBR       | 3833.251                        | 66727000        | 0.92     | 0.351          |
| 34 | USA       | 9903.651                        | 325084992       | 0.922    | 0.391          |
| 35 | CHL       | 1897.797                        | 18470000        | 0.842    | 0.454          |
| 36 | EST       | 2012.957                        | 1319000         | 0.868    | 0.314          |
| 37 | ISR       | 2551.4                          | 8244000         | 0.902    | 0.346          |
| 38 | SVN       | 2682.92                         | 2076000         | 0.894    | 0.244          |
| 39 | LVA       | 1582.955                        | 1951000         | 0.844    | 0.346          |
| 40 | LTU       | 2057.825                        | 2845000         | 0.855    | 0.378          |
| 41 |           |                                 |                 |          |                |
| 42 |           |                                 |                 |          |                |
| 43 |           |                                 |                 |          |                |
| 44 |           |                                 |                 |          |                |
| 45 |           |                                 |                 |          |                |
| 46 |           |                                 |                 |          |                |
| 47 |           |                                 |                 |          |                |
| 48 |           |                                 |                 |          |                |
| 49 |           |                                 |                 |          |                |
| 50 |           |                                 |                 |          |                |
| 51 |           |                                 |                 |          |                |
| 52 |           |                                 |                 |          |                |
| 53 |           |                                 |                 |          |                |
| 54 |           |                                 |                 |          |                |
| 55 |           |                                 |                 |          |                |
| 56 |           |                                 |                 |          |                |
| 57 |           |                                 |                 |          |                |
| 58 |           |                                 |                 |          |                |
| 59 |           |                                 |                 |          |                |
| 60 |           |                                 |                 |          |                |

## Sheet1

| COUNTRIES | Unemploy_2016 (%) | Combined_2017 (%) | ASD_2017 (%) | ADHD_2017 (%) |
|-----------|-------------------|-------------------|--------------|---------------|
| AUS       | 5.710301          | 18.3812834362     | 0.6362445351 | 2.5306771454  |
| AUT       | 6.014071          | 14.3621360785     | 0.6247499653 | 1.0291455466  |
| BEL       | 7.833329          | 15.0180942245     | 0.6270042851 | 1.0340810836  |
| CAN       | 6.991667          | 15.508528659      | 0.9354863859 | 1.3818192343  |
| CZE       | 3.952049          | 11.3507025196     | 0.4781512595 | 1.0365472615  |
| DNK       | 6.180843          | 14.2693279617     | 0.7289829608 | 1.1611398391  |
| FIN       | 8.811286          | 14.8902418052     | 0.6332739762 | 1.5210562047  |
| FRA       | 10.05661          | 16.361245236      | 0.5818691317 | 1.0737833252  |
| DEU       | 4.122733          | 15.1776062466     | 0.6398522986 | 0.4271855887  |
| GRC       | 23.54104          | 15.517001365      | 0.6220077054 | 1.0219205509  |
| HUN       | 5.119285          | 11.4123956502     | 0.4688887668 | 1.0305108838  |
| ISL       | 2.968629          | 14.2126279275     | 0.6059332969 | 0.9186699168  |
| IRL       | 8.37511           | 15.6060996027     | 0.6694972714 | 1.1080569888  |
| ITA       | 11.68803          | 14.8899699846     | 0.6242815014 | 1.187025833   |
| JPN       | 3.116667          | 12.3609159143     | 0.8481478268 | 0.6891136944  |
| KOR       | 3.675             | 11.8085065171     | 0.6582868691 | 0.6588837811  |
| LUX       | 6.285928          | 14.6309888939     | 0.6276587589 | 1.0273360494  |
| MEX       | 3.885191          | 10.8697103818     | 0.4574169643 | 0.6579181428  |
| NLD       | 6.00791           | 16.0445936088     | 0.6982911568 | 1.0294338318  |
| NZL       | 5.1               | 18.7124207228     | 0.6258004568 | 1.9066575163  |
| NOR       | 4.677024          | 16.1195478965     | 0.5875293783 | 0.780681921   |
| POL       | 6.161703          | 10.983524423      | 0.4735394525 | 1.0344898081  |
| PRT       | 11.06846          | 15.3111569041     | 0.6047065185 | 1.020027929   |
| SVK       | 9.671689          | 11.0868433214     | 0.4707288967 | 1.0318509022  |
| ESP       | 19.63388          | 16.1766418629     | 0.6286840174 | 1.687412147   |
| SWE       | 6.991096          | 15.5630025941     | 0.6853350476 | 1.0070551873  |
| CHE       | 4.918711          | 14.8574804285     | 0.6340955061 | 1.2011420552  |
| TUR       | 10.83812          | 14.3051507066     | 0.3557808045 | 1.9953047755  |
| GBR       | 4.809951          | 14.649797989      | 0.6752636399 | 1.0516892814  |
| USA       | 4.866667          | 17.3435577511     | 0.7359423594 | 1.3057577161  |
| CHL       | 6.490013          | 16.0754862806     | 0.6411863023 | 1.6610497479  |
| EST       | 6.753039          | 12.0396861009     | 0.4642171942 | 1.0509778991  |
| ISR       | 4.808333          | 12.7166147306     | 0.5735818845 | 1.0879258739  |
| SVN       | 8.006598          | 11.5639021525     | 0.4832933639 | 1.0444496063  |
| LVA       | 9.641258          | 11.6333516914     | 0.4557207875 | 1.0385200603  |
| LTU       | 7.860914          | 12.2014310998     | 0.4563094582 | 1.0348294698  |

## Sheet1

1  
2  
3  
4  
5  
6  
7  
8  
9  
10  
11  
12  
13  
14  
15  
16  
17  
18  
19  
20  
21  
22  
23  
24  
25  
26  
27  
28  
29  
30  
31  
32  
33  
34  
35  
36  
37  
38  
39  
40  
41  
42  
43  
44  
45  
46  
47  
48  
49  
50  
51  
52  
53  
54  
55  
56  
57  
58  
59  
60

| COUNTRIES | DEP_2017 (%) | SCZ_2017 (%) | ANX_2017 (%) | ED_2017 (%)  | ETOH_2017 (%) |
|-----------|--------------|--------------|--------------|--------------|---------------|
| AUS       | 4.6238809861 | 0.3633263334 | 6.5843011771 | 0.943081004  | 1.5119351423  |
| AUT       | 3.2609699942 | 0.2569578522 | 5.3412753953 | 0.6751119616 | 1.8240650937  |
| BEL       | 4.1091861548 | 0.2580726028 | 5.2126446444 | 0.6038688957 | 1.4656385696  |
| CAN       | 3.9887920735 | 0.3155881045 | 5.1782183945 | 0.4773042772 | 1.6179370416  |
| CZE       | 2.6753874663 | 0.2099890618 | 3.4436009907 | 0.242372761  | 2.0971724563  |
| DNK       | 3.2918853248 | 0.254016903  | 5.3146345499 | 0.540025325  | 1.7307231327  |
| FIN       | 4.7927356063 | 0.2574443779 | 3.7520618778 | 0.5949376269 | 2.6050609017  |
| FRA       | 4.2538072628 | 0.2562379047 | 6.6267102113 | 0.5737552866 | 1.4189578909  |
| DEU       | 3.9598660918 | 0.2522693135 | 6.5404958034 | 0.5220663374 | 1.8064746829  |
| GRC       | 4.1858636992 | 0.2527008364 | 5.7902279453 | 0.5593235698 | 1.1242569646  |
| HUN       | 2.7652421786 | 0.205524223  | 3.4546566254 | 0.2376863899 | 2.1073935961  |
| ISL       | 3.3616652117 | 0.2576165352 | 5.2909878008 | 0.5580137464 | 1.2490285925  |
| IRL       | 4.2509209974 | 0.3280076665 | 5.8390924847 | 0.5599946954 | 2.1098479051  |
| ITA       | 3.4642561166 | 0.2361974523 | 5.6261210651 | 0.6267836426 | 0.4629368554  |
| JPN       | 3.341564631  | 0.2955777434 | 3.5690542849 | 0.4543786087 | 0.5828795113  |
| KOR       | 3.1656839582 | 0.2639935986 | 3.7780045481 | 0.4171034821 | 2.0200501273  |
| LUX       | 3.6177186785 | 0.2636222409 | 5.3165160352 | 0.7379165359 | 1.3532344183  |
| MEX       | 2.7888065701 | 0.211765456  | 3.1863264117 | 0.3169754492 | 1.7296042544  |
| NLD       | 4.0268544034 | 0.358487188  | 6.6202421942 | 0.4678440988 | 0.7766024847  |
| NZL       | 3.9712653692 | 0.3410509489 | 8.5399314968 | 0.6732900275 | 2.1934054542  |
| NOR       | 3.77191037   | 0.2114838399 | 7.5855027602 | 0.5703626361 | 1.4190025311  |
| POL       | 2.2504718928 | 0.2078099    | 3.4610750158 | 0.2294849029 | 2.044346289   |
| PRT       | 4.4214605472 | 0.2493723527 | 5.3832606315 | 0.5130788046 | 1.2629045289  |
| SVK       | 2.4019985472 | 0.2084189518 | 3.4442511078 | 0.2354746722 | 2.5004818341  |
| ESP       | 3.5383592906 | 0.281538914  | 5.2802785935 | 0.7306261886 | 0.8850033633  |
| SWE       | 4.4879109942 | 0.2703918248 | 5.293836611  | 0.5746082797 | 1.5865878354  |
| CHE       | 3.7080597373 | 0.2624869018 | 5.3593931408 | 0.5739686951 | 1.3796903016  |
| TUR       | 3.7186578279 | 0.2212524162 | 3.913400441  | 0.3089411909 | 0.7780786129  |
| GBR       | 4.1195239912 | 0.2629523416 | 4.6498609311 | 0.5430536141 | 1.8970516124  |
| USA       | 4.8356104088 | 0.3338899424 | 6.6350550354 | 0.5128443294 | 2.0400868929  |
| CHL       | 4.057723142  | 0.2014303969 | 6.2720843134 | 0.4161228571 | 2.4494702182  |
| EST       | 3.8488542112 | 0.2039776429 | 2.9622437654 | 0.2502707425 | 4.7136170972  |
| ISR       | 3.8322207094 | 0.2591393307 | 3.0630780729 | 0.4611753105 | 0.4983810947  |
| SVN       | 2.8632776644 | 0.2118237402 | 3.449772721  | 0.2396358281 | 2.2468269434  |
| LVA       | 3.4995706624 | 0.1995096013 | 2.9449498166 | 0.2252753737 | 4.4087812358  |
| LTU       | 4.1432544207 | 0.2009824146 | 2.9372241655 | 0.2340949007 | 4.4280010228  |

## Sheet1

| COUNTRIES | SUICIDE_2017 (per 100.000) | BD_2017 (%)  |
|-----------|----------------------------|--------------|
| AUS       | 11.0468849404              | 1.1420970115 |
| AUT       | 11.2021569903              | 0.9397941744 |
| BEL       | 14.275318769               | 0.9471588495 |
| CAN       | 10.9051948299              | 0.7164133538 |
| CZE       | 10.7666275634              | 0.7215695351 |
| DNK       | 8.8002797464               | 1.0054935407 |
| FIN       | 12.9449467354              | 1.0058262568 |
| FRA       | 12.400297975               | 0.9581989776 |
| DEU       | 9.9174170314               | 0.7767618863 |
| GRC       | 3.5062542313               | 0.9489261067 |
| HUN       | 14.2817310305              | 0.7034354507 |
| ISL       | 9.6083352428               | 0.9711215949 |
| IRL       | 8.3741480781               | 0.8054319625 |
| ITA       | 4.7595847765               | 0.9462571309 |
| JPN       | 15.6479510719              | 0.6883536082 |
| KOR       | 20.8056602706              | 0.569459331  |
| LUX       | 8.7049926039               | 0.9346808098 |
| MEX       | 5.9223876521               | 0.8189213485 |
| NLD       | 9.1691061872               | 0.9473002678 |
| NZL       | 11.2963423597              | 1.2060879818 |
| NOR       | 9.2688064679               | 0.856901351  |
| POL       | 13.9481400147              | 0.7122644933 |
| PRT       | 7.687679698                | 0.9258145066 |
| SVK       | 9.4748496505               | 0.7124338302 |
| ESP       | 5.5065007931               | 0.9769173255 |
| SWE       | 11.0767355283              | 1.0579298061 |
| CHE       | 9.3160623375               | 0.9539959074 |
| TUR       | 3.310770446                | 0.8487702802 |
| GBR       | 7.3563205517               | 1.0868375991 |
| USA       | 12.8357566779              | 0.6512355015 |
| CHL       | 10.1389641762              | 0.7905914166 |
| EST       | 12.738720091               | 0.7082405618 |
| ISR       | 5.7333380073               | 0.9248024668 |
| SVN       | 14.3787089293              | 0.7253433069 |
| LVA       | 16.9886737387              | 0.6963494113 |
| LTU       | 27.9905844218              | 0.7002779347 |

## SUPPLEMENTARY MATERIAL

### SUPPLEMENTARY RESULTS

#### Analysis taking into account overall healthcare spending

To ensure that our results were not impacted by overall healthcare expenditures, we decided to regress out the influence of healthcare spending on the prevalence of each mental health issue and to re-run our analysis using the residuals as dependent variables. When performed on a combination of mental health disorders, multiple linear regression models revealed that the effect of development ( $r_{\text{HDI}}$ ), inequalities ( $r_{\text{GINI}}$ ) and unemployment ( $r_{\text{unemploy}}$ ) was medium to large ( $r$  range: 0.47-0.54). However they demonstrated great variation when performed amongst different mental health issues ( $r$  range: -0.34 to 0.52, **Supplementary Table 2**).

Across mental issues, the socio-economic indicators' effect sizes were strongly related to each other ( $r_{\text{HDI-GINI}}=0.89$ ,  $r_{\text{HDI-unemploy}}=0.93$ ,  $r_{\text{unemploy-GINI}}=0.87$ ). Principal component analysis demonstrated that the first principal component of the three variables ( $r_{\text{HDI}}$ ,  $r_{\text{GINI}}$ ,  $r_{\text{unemploy}}$ ) explained 94% of the variance ( $p=0$ , permutation test with 1000 repetitions).

Therefore, this analysis yield similar results than that reported in the main text.

#### Analysis using robust regression methods

To ensure that our results were not impacted by outliers, we re-ran our analyses using robust regression methods [1]. We used the `lmrob` function from the `robustbase` package in R (version 3.6.1), which computes fast MM-type estimators for linear regression models. We sat the default arguments as suggested in Koller and Stahel (2011) with an initial S-estimate, followed by an M-estimate, a Design Adaptive Scale estimate and a final M-step; and a "linear quadratic quadratic" (lqq for short) psi function [2].

When performed on a combination of mental health disorders, multiple linear regression

1  
2 models revealed that the effect of development ( $r_{\text{HDI}}$ ), inequalities ( $r_{\text{GINI}}$ ) and unemployment  
3  
4 ( $r_{\text{unemploy}}$ ) was medium to large (r range: 0.44-0.59). However they demonstrated great variation  
5  
6 when performed amongst different mental health issues (r range: -0.43 to 0.55, **Supplementary**  
7  
8 **Table 3**). Across mental issues, the socio-economic indicators' effect sizes were strongly related to  
9  
10 each other ( $r_{\text{HDI-GINI}}=0.93$ ,  $r_{\text{HDI-unemploy}}=0.87$ ,  $r_{\text{unemploy-GINI}}=0.91$ ). Principal component analysis  
11  
12 demonstrated that the first principal component of the three variables ( $r_{\text{HDI}}$ ,  $r_{\text{GINI}}$ ,  $r_{\text{unemploy}}$ ) explained  
13  
14 94% of the variance ( $p=0$ , permutation test with 1000 repetitions).  
15

16  
17 Therefore, results using robust linear regression methods were highly comparable to those  
18  
19 using non-robust methods.  
20  
21  
22  
23  
24  
25  
26  
27  
28  
29  
30  
31  
32  
33  
34  
35  
36  
37  
38  
39  
40  
41  
42  
43  
44  
45  
46  
47  
48  
49  
50  
51  
52  
53  
54  
55  
56  
57  
58  
59  
60



## SUPPLEMENTARY TABLES

**Supplementary Table 1. Summary statistics of multiple linear regression models run on the prevalence of 10 mental health issues (N=36).**

| Predictor                                        | Estimator coefficient | 95% Confidence interval | T value | Effect size (Pearson's r) | P value   |
|--------------------------------------------------|-----------------------|-------------------------|---------|---------------------------|-----------|
| <b>Combined mental health issues<sup>a</sup></b> |                       |                         |         |                           |           |
| HDI                                              | 45.9                  | 31.8 to 60.1            | 6.6     | 0.76                      | 0.0000002 |
| GINI index                                       | 22.1                  | 11.2 to 33.0            | 4.1     | 0.59                      | 0.0002    |
| Unemployment                                     | 0.2                   | 0.08 to 0.3             | 3.3     | 0.51                      | 0.002     |
| <b>Autism Spectrum Disorder</b>                  |                       |                         |         |                           |           |
| HDI                                              | 2.5                   | 1.7 to 3.3              | 6.3     | 0.74                      | 0.0000005 |
| GINI index                                       | 0.9                   | 0.3 to 1.5              | 3.0     | 0.46                      | 0.006     |
| Unemployment                                     | 0.003                 | -0.004 to 0.01          | 0.8     | 0.15                      | 0.4       |
| <b>ADHD</b>                                      |                       |                         |         |                           |           |
| HDI                                              | 2.3                   | -1.6 to 6.1             | 1.2     | 0.21                      | 0.2       |
| GINI index                                       | 2.6                   | -0.4 to 5.6             | 1.8     | 0.30                      | 0.09      |
| Unemployment                                     | 0.03                  | -0.007 to 0.06          | 1.6     | 0.27                      | 0.1       |
| <b>Depressive Disorders</b>                      |                       |                         |         |                           |           |
| HDI                                              | 12.3                  | 7.6 to 17.1             | 5.2     | 0.68                      | 0.000009  |
| GINI index                                       | 7.5                   | 3.9 to 11.2             | 4.2     | 0.59                      | 0.0002    |
| Unemployment                                     | 0.05                  | 0.01 to 0.09            | 2.6     | 0.42                      | 0.01      |
| <b>Schizophrenia</b>                             |                       |                         |         |                           |           |
| HDI                                              | 1.0                   | 0.6 to 1.3              | 5.8     | 0.72                      | 0.000002  |
| GINI index                                       | 0.4                   | 0.1 to 0.7              | 3.1     | 0.49                      | 0.004     |
| Unemployment                                     | 0.001                 | -0.001 to 0.004         | 1.0     | 0.18                      | 0.3       |
| <b>Anxiety Disorders</b>                         |                       |                         |         |                           |           |
| HDI                                              | 27.4                  | 15.9 to 38.9            | 4.9     | 0.65                      | 0.00003   |
| GINI index                                       | 10.6                  | 1.7 to 19.4             | 2.4     | 0.40                      | 0.02      |
| Unemployment                                     | 0.08                  | -0.02 to 0.2            | 1.7     | 0.29                      | 0.1       |
| <b>Eating Disorders</b>                          |                       |                         |         |                           |           |
| HDI                                              | 3.7                   | 2.5 to 4.9              | 6.2     | 0.74                      | 0.0000005 |
| GINI index                                       | 1.3                   | 0.4 to 2.2              | 2.8     | 0.45                      | 0.008     |
| Unemployment                                     | 0.01                  | 0.004 to 0.02           | 2.8     | 0.45                      | 0.008     |
| <b>Alcohol Use Disorders</b>                     |                       |                         |         |                           |           |
| HDI                                              | -7.6                  | -17.5 to 2.3            | -1.6    | -0.27                     | 0.1       |
| GINI index                                       | -2.1                  | -9.7 to 5.5             | -0.6    | -0.10                     | 0.6       |
| Unemployment                                     | -0.04                 | -0.1 to 0.04            | -1.0    | -0.18                     | 0.3       |

Supplementary Table 1 continued

| Predictor                | Estimator coefficient | 95% Confidence interval | T value | Effect size (Pearson's r) | P value |
|--------------------------|-----------------------|-------------------------|---------|---------------------------|---------|
| <b>Suicide</b>           |                       |                         |         |                           |         |
| HDI                      | -9.1                  | -55.6 to 37.4           | -0.4    | -0.07                     | 0.7     |
| GINI index               | -6.8                  | -42.6 to 28.9           | -0.4    | -0.07                     | 0.7     |
| Unemployment             | -0.4                  | -0.8 to 0.0005          | -2.0    | -0.34                     | 0.05    |
| <b>Bipolar Disorders</b> |                       |                         |         |                           |         |
| HDI                      | 1.8                   | 0.4 to 3.2              | 2.7     | 0.43                      | 0.01    |
| GINI index               | 0.4                   | -0.6 to 1.5             | 0.8     | 0.14                      | 0.4     |
| Unemployment             | 0.01                  | -0.001 to 0.02          | 1.8     | 0.30                      | 0.08    |

<sup>a</sup> this includes Autism Spectrum Disorders, ADHD, Conduct Disorders, Idiopathic developmental intellectual disability, Depressive disorders, Schizophrenia, Anxiety disorders, Eating disorder and Bipolar disorders.

**Supplementary Table 2. Summary statistics of multiple linear regression models run on the prevalence of 10 mental health issues after controlling for overall healthcare spending (N=36).**

| Predictor                                        | Estimator coefficient | 95% Confidence interval | T value | Effect size (Pearson's r) | P value |
|--------------------------------------------------|-----------------------|-------------------------|---------|---------------------------|---------|
| <b>Combined mental health issues<sup>a</sup></b> |                       |                         |         |                           |         |
| HDI                                              | 20.5                  | 6.6 to 34.4             | 3.0     | 0.47                      | 0.005   |
| GINI index                                       | 16.9                  | 6.2 to 27.6             | 3.2     | 0.49                      | 0.003   |
| Unemployment                                     | 0.2                   | 0.1 to 0.3              | 3.7     | 0.54                      | 0.0009  |
| <b>Autism Spectrum Disorder</b>                  |                       |                         |         |                           |         |
| HDI                                              | 1.0                   | 0.1 to 1.8              | 2.3     | 0.38                      | 0.03    |
| GINI index                                       | 0.6                   | -0.1 to 1.3             | 1.5     | 0.31                      | 0.08    |
| Unemployment                                     | 0.004                 | -0.004 to 0.01          | 1.0     | 0.18                      | 0.3     |
| <b>ADHD</b>                                      |                       |                         |         |                           |         |
| HDI                                              | 2.4                   | -1.4 to 6.3             | 1.3     | 0.22                      | 0.2     |
| GINI index                                       | 2.6                   | -0.4 to 5.6             | 1.8     | 0.30                      | 0.1     |
| Unemployment                                     | 0.03                  | -0.008 to 0.06          | 1.6     | 0.27                      | 0.1     |
| <b>Depressive Disorders</b>                      |                       |                         |         |                           |         |
| HDI                                              | 6.2                   | 1.4 to 10.9             | 2.6     | 0.42                      | 0.01    |
| GINI index                                       | 6.3                   | 2.6 to 9.9              | 3.5     | 0.52                      | 0.001   |
| Unemployment                                     | 0.06                  | 0.02 to 0.1             | 2.8     | 0.45                      | 0.008   |
| <b>Schizophrenia</b>                             |                       |                         |         |                           |         |
| HDI                                              | 0.4                   | 0.04 to 0.8             | 2.3     | 0.38                      | 0.03    |
| GINI index                                       | 0.3                   | 0.01 to 0.6             | 2.1     | 0.35                      | 0.04    |
| Unemployment                                     | 0.002                 | -0.001 to 0.005         | 1.2     | 0.21                      | 0.2     |
| <b>Anxiety Disorders</b>                         |                       |                         |         |                           |         |
| HDI                                              | 9.6                   | -1.5 to 20.7            | 1.8     | 0.30                      | 0.09    |
| GINI index                                       | 6.9                   | -1.6 to 15.4            | 1.7     | 0.28                      | 0.1     |
| Unemployment                                     | 0.09                  | -0.001 to 0.2           | 2.0     | 0.34                      | 0.05    |
| <b>Eating Disorders</b>                          |                       |                         |         |                           |         |
| HDI                                              | 1.8                   | 0.5 to 3.1              | 2.8     | 0.44                      | 0.009   |
| GINI index                                       | 0.9                   | -0.1 to 1.9             | 1.8     | 0.31                      | 0.08    |
| Unemployment                                     | 0.02                  | 0.005 to 0.03           | 2.9     | 0.42                      | 0.007   |
| <b>Alcohol Use Disorders</b>                     |                       |                         |         |                           |         |
| HDI                                              | -2.2                  | -12.0 to 7.5            | -0.5    | -0.08                     | 0.6     |
| GINI index                                       | -1.0                  | -8.5 to 6.5             | -0.3    | -0.05                     | 0.8     |
| Unemployment                                     | -0.05                 | -0.1 to 0.04            | -1.1    | -0.20                     | 0.3     |

Supplementary Table 2 continued

| Predictor                | Estimator coefficient | 95% Confidence interval | T value | Effect size (Pearson's r) | P value |
|--------------------------|-----------------------|-------------------------|---------|---------------------------|---------|
| <b>Suicide</b>           |                       |                         |         |                           |         |
| HDI                      | -7.8                  | -54.2 to 38.7           | -0.3    | -0.06                     | 0.7     |
| GINI index               | -6.5                  | -42.3 to 29.2           | -0.4    | -0.07                     | 0.7     |
| Unemployment             | -0.4                  | -0.8 to -0.0008         | -2.0    | -0.34                     | 0.05    |
| <b>Bipolar Disorders</b> |                       |                         |         |                           |         |
| HDI                      | 1.2                   | -0.2 to 2.7             | 1.7     | 0.29                      | 0.09    |
| GINI index               | 0.3                   | -0.8 to 1.4             | 0.6     | 0.10                      | 0.6     |
| Unemployment             | 0.01                  | -0.001 to 0.02          | 1.8     | 0.30                      | 0.08    |

<sup>a</sup> this includes Autism Spectrum Disorders, ADHD, Conduct Disorders, Idiopathic developmental intellectual disability, Depressive disorders, Schizophrenia, Anxiety disorders, Eating disorder and Bipolar disorders.

**Supplementary Table 3. Summary statistics of multiple linear models run on the prevalence of 10 mental health issues using robust regression methods (after controlling for overall healthcare spending) (N=36).**

| Predictor                                           | Estimator coefficient | 95% Confidence interval | T value | Effect size (Pearson's r) | P value |
|-----------------------------------------------------|-----------------------|-------------------------|---------|---------------------------|---------|
| <b>Combined mental health disorders<sup>a</sup></b> |                       |                         |         |                           |         |
| HDI                                                 | 17.5                  | 4.5 to 30.5             | 2.7     | 0.44                      | 0.01    |
| GINI index                                          | 13.9                  | 3.8 to 24.0             | 2.8     | 0.44                      | 0.01    |
| Unemployment                                        | 0.2                   | 0.1 to 0.3              | 4.1     | 0.59                      | 0.0002  |
| <b>Autism Spectrum Disorders</b>                    |                       |                         |         |                           |         |
| HDI                                                 | 0.9                   | 0.2 to 1.6              | 2.6     | 0.42                      | 0.01    |
| GINI index                                          | 0.6                   | 0.06 to 1.1             | 2.3     | 0.37                      | 0.03    |
| Unemployment                                        | 0.004                 | -0.001 to 0.01          | 1.5     | 0.26                      | 0.1     |
| <b>ADHD</b>                                         |                       |                         |         |                           |         |
| HDI                                                 | 1.5                   | -1.6 to 4.6             | 1.0     | 0.17                      | 0.3     |
| GINI index                                          | 1.5                   | -0.8 to 3.9             | 1.3     | 0.23                      | 0.2     |
| Unemployment                                        | 0.03                  | 0.0009 to 0.05          | 2.1     | 0.35                      | 0.04    |
| <b>Depressive Disorders</b>                         |                       |                         |         |                           |         |
| HDI                                                 | 6.4                   | 1.6 to 11.2             | 2.7     | 0.43                      | 0.01    |
| GINI index                                          | 6.7                   | 3.0 to 10.4             | 3.7     | 0.55                      | 0.0008  |
| Unemployment                                        | 0.06                  | 0.02 to 0.1             | 2.8     | 0.45                      | 0.008   |
| <b>Schizophrenia</b>                                |                       |                         |         |                           |         |
| HDI                                                 | 0.3                   | -0.0003 to 0.7          | 2.0     | 0.34                      | 0.05    |
| GINI index                                          | 0.2                   | -0.02 to 0.5            | 1.9     | 0.32                      | 0.07    |
| Unemployment                                        | 0.002                 | -0.001 to 0.005         | 1.3     | 0.23                      | 0.2     |
| <b>Anxiety Disorders</b>                            |                       |                         |         |                           |         |
| HDI                                                 | 7.4                   | -2.6 to 17.5            | 1.5     | 0.26                      | 0.1     |
| GINI index                                          | 4.4                   | -3.5 to 12.3            | 1.1     | 0.20                      | 0.3     |
| Unemployment                                        | 0.1                   | 0.02 to 0.2             | 2.4     | 0.40                      | 0.02    |
| <b>Eating Disorders</b>                             |                       |                         |         |                           |         |
| HDI                                                 | 1.9                   | 0.8 to 3.0              | 3.5     | 0.52                      | 0.001   |
| GINI index                                          | 1.2                   | 0.3 to 2.0              | 2.7     | 0.43                      | 0.01    |
| Unemployment                                        | 0.02                  | 0.006 to 0.02           | 3.4     | 0.52                      | 0.002   |
| <b>Alcohol Use Disorders</b>                        |                       |                         |         |                           |         |
| HDI                                                 | 0.9                   | -6.4 to 8.2             | 0.3     | 0.04                      | 0.8     |
| GINI index                                          | -1.2                  | -6.7 to 4.4             | -0.4    | -0.07                     | 0.7     |
| Unemployment                                        | -0.05                 | -0.1 to 0.02            | -1.5    | -0.26                     | 0.1     |

Supplementary Table 3 continued

| Predictor                | Estimator coefficient | 95% Confidence interval | T value | Effect size (Pearson's r) | P value |
|--------------------------|-----------------------|-------------------------|---------|---------------------------|---------|
| <b>Suicide</b>           |                       |                         |         |                           |         |
| HDI                      | -3.2                  | -35.5 to 29.1           | -0.2    | -0.04                     | 0.8     |
| GINI index               | -18.8                 | -43.8 to 6.3            | -1.5    | -0.26                     | 0.1     |
| Unemployment             | -0.4                  | -0.6 to -0.09           | -2.7    | -0.43                     | 0.01    |
| <b>Bipolar Disorders</b> |                       |                         |         |                           |         |
| HDI                      | 1.4                   | -0.05 to 2.8            | 2.0     | 0.33                      | 0.06    |
| GINI index               | 0.5                   | -0.6 to 1.6             | 0.9     | 0.16                      | 0.4     |
| Unemployment             | 0.01                  | -0.001 to 0.02          | 1.8     | 0.30                      | 0.08    |

<sup>a</sup> this includes Autism Spectrum Disorders, ADHD, Conduct Disorders, Idiopathic developmental intellectual disability, Depressive disorders, Schizophrenia, Anxiety disorders, Eating disorder and Bipolar disorders.

**REFERENCES**

- 1 Maronna RA, Martin RD, Yohai VJ, Salibián-Barrera M. *Robust statistics: theory and methods (with R)*. John Wiley & Sons, 2019.
- 2 Koller M, Stahel WA. Sharpening wald-type inference in robust regression for small samples. *Comput Stat Data Anal* 2011; **55**: 2504–2515.

For peer review only

1  
2  
3  
4  
5  
6  
7  
8  
9  
10  
11  
12  
13  
14  
15  
16  
17  
18  
19  
20  
21  
22  
23  
24  
25  
26  
27  
28  
29  
30  
31  
32  
33  
34  
35  
36  
37  
38  
39  
40  
41  
42  
43  
44  
45  
46  
47  
48  
49  
50  
51  
52  
53  
54  
55  
56  
57  
58  
59  
60

For peer review only



1  
2  
3  
4  
5  
6  
7  
8  
9  
10  
11  
12  
13  
14  
15  
16  
17  
18  
19  
20  
21  
22  
23  
24  
25  
26  
27  
28  
29  
30  
31  
32  
33  
34  
35  
36  
37  
38  
39  
40  
41  
42  
43  
44  
45  
46  
47  
48  
49  
50  
51  
52  
53  
54  
55  
56  
57  
58  
59  
60STROBE Statement—Checklist of items that should be included in reports of *cross-sectional studies*

|                              | Item No | Recommendation                                                                                                                                                                                               |
|------------------------------|---------|--------------------------------------------------------------------------------------------------------------------------------------------------------------------------------------------------------------|
| <b>Title and abstract</b>    | 1 ✓     | (a) Indicate the study's design with a commonly used term in the title or the abstract                                                                                                                       |
|                              | ✓       | (b) Provide in the abstract an informative and balanced summary of what was done and what was found                                                                                                          |
| <b>Introduction</b>          |         |                                                                                                                                                                                                              |
| Background/rationale         | 2 ✓     | Explain the scientific background and rationale for the investigation being reported                                                                                                                         |
| Objectives                   | 3 ✓     | State specific objectives, including any prespecified hypotheses                                                                                                                                             |
| <b>Methods</b>               |         |                                                                                                                                                                                                              |
| Study design                 | 4 ✓     | Present key elements of study design early in the paper                                                                                                                                                      |
| Setting                      | 5 ✓     | Describe the setting, locations, and relevant dates, including periods of recruitment, exposure, follow-up, and data collection                                                                              |
| Participants                 | 6 ✓     | (a) Give the eligibility criteria, and the sources and methods of selection of participants                                                                                                                  |
| Variables                    | 7 ✓     | Clearly define all outcomes, exposures, predictors, potential confounders, and effect modifiers. Give diagnostic criteria, if applicable                                                                     |
| Data sources/<br>measurement | 8* ✓    | For each variable of interest, give sources of data and details of methods of assessment (measurement). Describe comparability of assessment methods if there is more than one group                         |
| Bias                         | 9 ✓     | Describe any efforts to address potential sources of bias                                                                                                                                                    |
| Study size                   | 10 ✓    | Explain how the study size was arrived at                                                                                                                                                                    |
| Quantitative variables       | 11 ✓    | Explain how quantitative variables were handled in the analyses. If applicable, describe which groupings were chosen and why                                                                                 |
| Statistical methods          | 12 ✓    | (a) Describe all statistical methods, including those used to control for confounding                                                                                                                        |
|                              | ✓       | (b) Describe any methods used to examine subgroups and interactions                                                                                                                                          |
|                              | ✓       | (c) Explain how missing data were addressed                                                                                                                                                                  |
|                              | ✓       | (d) If applicable, describe analytical methods taking account of sampling strategy                                                                                                                           |
|                              | ✓       | (e) Describe any sensitivity analyses                                                                                                                                                                        |
| <b>Results</b>               |         |                                                                                                                                                                                                              |
| Participants                 | 13* ✓   | (a) Report numbers of individuals at each stage of study—eg numbers potentially eligible, examined for eligibility, confirmed eligible, included in the study, completing follow-up, and analysed            |
|                              | ✓       | (b) Give reasons for non-participation at each stage                                                                                                                                                         |
|                              | ✓       | (c) Consider use of a flow diagram                                                                                                                                                                           |
| Descriptive data             | 14* ✓   | (a) Give characteristics of study participants (eg demographic, clinical, social) and information on exposures and potential confounders                                                                     |
|                              | ✓       | (b) Indicate number of participants with missing data for each variable of interest                                                                                                                          |
| Outcome data                 | 15* ✓   | Report numbers of outcome events or summary measures                                                                                                                                                         |
| Main results                 | 16 ✓    | (a) Give unadjusted estimates and, if applicable, confounder-adjusted estimates and their precision (eg, 95% confidence interval). Make clear which confounders were adjusted for and why they were included |
|                              | ✓       | (b) Report category boundaries when continuous variables were categorized                                                                                                                                    |
|                              | ✓       | (c) If relevant, consider translating estimates of relative risk into absolute risk for a meaningful time period                                                                                             |
| Other analyses               | 17 ✓    | Report other analyses done—eg analyses of subgroups and interactions, and sensitivity analyses                                                                                                               |

|                          |      |                                                                                                                                                                            |
|--------------------------|------|----------------------------------------------------------------------------------------------------------------------------------------------------------------------------|
| <b>Discussion</b>        |      |                                                                                                                                                                            |
| Key results              | 18 ✓ | Summarise key results with reference to study objectives                                                                                                                   |
| Limitations              | 19 ✓ | Discuss limitations of the study, taking into account sources of potential bias or imprecision. Discuss both direction and magnitude of any potential bias                 |
| Interpretation           | 20 ✓ | Give a cautious overall interpretation of results considering objectives, limitations, multiplicity of analyses, results from similar studies, and other relevant evidence |
| Generalisability         | 21 ✓ | Discuss the generalisability (external validity) of the study results                                                                                                      |
| <b>Other information</b> |      |                                                                                                                                                                            |
| Funding                  | 22 ✓ | Give the source of funding and the role of the funders for the present study and, if applicable, for the original study on which the present article is based              |

\*Give information separately for exposed and unexposed groups.

**Note:** An Explanation and Elaboration article discusses each checklist item and gives methodological background and published examples of transparent reporting. The STROBE checklist is best used in conjunction with this article (freely available on the Web sites of PLoS Medicine at <http://www.plosmedicine.org/>, Annals of Internal Medicine at <http://www.annals.org/>, and Epidemiology at <http://www.epidem.com/>). Information on the STROBE Initiative is available at [www.strobe-statement.org](http://www.strobe-statement.org).

# BMJ Open

## **An ecological study of the association between mental illness with human development, income inequalities and unemployment across OECD countries**

|                                 |                                                                                              |
|---------------------------------|----------------------------------------------------------------------------------------------|
| Journal:                        | <i>BMJ Open</i>                                                                              |
| Manuscript ID                   | bmjopen-2019-035055.R2                                                                       |
| Article Type:                   | Original research                                                                            |
| Date Submitted by the Author:   | 31-Mar-2020                                                                                  |
| Complete List of Authors:       | Barbalat, Guillaume; CNRS & Université Lyon 1<br>Franck , Nicolas ; CNRS & Université Lyon 1 |
| <b>Primary Subject Heading</b>: | Epidemiology                                                                                 |
| Secondary Subject Heading:      | Mental health, Sociology, Global health                                                      |
| Keywords:                       | MENTAL HEALTH, EPIDEMIOLOGY, SOCIAL MEDICINE                                                 |
|                                 |                                                                                              |

SCHOLARONE™  
Manuscripts



I, the Submitting Author has the right to grant and does grant on behalf of all authors of the Work (as defined in the below author licence), an exclusive licence and/or a non-exclusive licence for contributions from authors who are: i) UK Crown employees; ii) where BMJ has agreed a CC-BY licence shall apply, and/or iii) in accordance with the terms applicable for US Federal Government officers or employees acting as part of their official duties; on a worldwide, perpetual, irrevocable, royalty-free basis to BMJ Publishing Group Ltd ("BMJ") its licensees and where the relevant Journal is co-owned by BMJ to the co-owners of the Journal, to publish the Work in this journal and any other BMJ products and to exploit all rights, as set out in our [licence](#).

The Submitting Author accepts and understands that any supply made under these terms is made by BMJ to the Submitting Author unless you are acting as an employee on behalf of your employer or a postgraduate student of an affiliated institution which is paying any applicable article publishing charge ("APC") for Open Access articles. Where the Submitting Author wishes to make the Work available on an Open Access basis (and intends to pay the relevant APC), the terms of reuse of such Open Access shall be governed by a Creative Commons licence – details of these licences and which [Creative Commons](#) licence will apply to this Work are set out in our licence referred to above.

Other than as permitted in any relevant BMJ Author's Self Archiving Policies, I confirm this Work has not been accepted for publication elsewhere, is not being considered for publication elsewhere and does not duplicate material already published. I confirm all authors consent to publication of this Work and authorise the granting of this licence.

1  
2 **TITLE PAGE**  
3  
4  
5

6 **Title:** An ecological study of the association between mental illness with human development,  
7  
8 income inequalities and unemployment across OECD countries.  
9

10  
11  
12  
13  
14 **Authors:** Guillaume BARBALAT, M.D., Ph.D.<sup>1</sup> & Nicolas FRANCK, M.D., Ph.D.<sup>1</sup>  
15

16 <sup>1</sup> Centre Ressource de Réhabilitation Psychosociale,  
17  
18 Centre Hospitalier le Vinatier & UMR 5229,  
19  
20 CNRS & Université Lyon 1,  
21  
22  
23 France  
24  
25  
26

27 **Corresponding author:**  
28

29 Guillaume Barbalat  
30  
31 Centre Ressource de Réhabilitation Psychosociale,  
32  
33 Centre Hospitalier le Vinatier & UMR 5229,  
34  
35 CNRS & Université Lyon 1,  
36  
37 France  
38  
39 +33 7 57 51 22 05  
40  
41 [guillaumebarbalat@gmail.com](mailto:guillaumebarbalat@gmail.com)  
42  
43  
44  
45

46 **Abstract word count:** 297.  
47

48 **Word count:** 3190 (excluding references, tables and acknowledgements).  
49  
50  
51  
52  
53  
54  
55  
56  
57  
58  
59  
60

## **ABSTRACT**

### **OBJECTIVES**

Recent studies have demonstrated worsened mental health in relatively highly developed countries impacted by social inequalities and unemployment. Here, we investigate (1) whether mental health issues are differently or similarly affected by these social factors; and (2) whether their effects on mental health are related or unrelated to each other.

### **SETTING**

Analysis at the country level amongst OECD (Organization for Economic Cooperation and Development) countries (N=36). Data on social indicators was collected from OECD and United Nations Development Programme (UNDP) databases. Data on the prevalence of mental issues was obtained from the Institute for Health Metrics and Evaluation (IHME)'s Global Burden of Disease (GBD) study 2017.

### **PARTICIPANTS**

No involvement of participants.

### **PRIMARY AND SECONDARY OUTCOME MEASURES**

Using linear regression models, we investigated the relative contribution played by human development (as measured by the Human Development Index - HDI), social inequalities (GINI index) and unemployment (unemployment rate) on the prevalence of 10 mental health issues. We then measured the relationship between the socio-economic factors' effects on mental issues using 2x2 Pearson's correlation test and Principal Component Analysis.

### **RESULTS**

First, the overall effect of each socio-economic factor on a combination of mental health disorders was large (r range: 0.51-0.76;  $p < 0.002$ ). However, the influence of social factors on mental health was relative to each mental issue (r range: -0.34 to 0.74). Second, the socio-economic factors' effects on mental health showed strong interdependence ( $r_{\text{HDI-GINI}}=0.93$ ,  $r_{\text{HDI-unemploy}}=0.81$ ,  $r_{\text{unemploy-}}$

1  
2  $r_{GINI}=0.84$ ;  $p<0.001$ . Principal component analysis demonstrated that the first principal component of  
3  
4 the three variables ( $r_{HDI}$ ,  $r_{GINI}$ ,  $r_{unemploy}$ ) explained 91.5% of the variance.  
5

## 6 **CONCLUSION**

7  
8  
9 These results implore a re-analysis of the socio-economic determinants of mental health where: 1)  
10  
11 the heterogeneity of mental health issues would be taken into account; and 2) each socio-  
12  
13 economic indicator's effect would be analysed and interpreted in conjunction with the others.  
14  
15  
16  
17  
18  
19  
20  
21  
22  
23  
24  
25  
26  
27  
28  
29  
30  
31  
32  
33  
34  
35  
36  
37  
38  
39  
40  
41  
42  
43  
44  
45  
46  
47  
48  
49  
50  
51  
52  
53  
54  
55  
56  
57  
58  
59  
60

For peer review only

## **STRENGTHS AND LIMITATIONS OF THIS STUDY**

- To allow for comparability across populations and minimize the risk of outliers, our study focused on OECD countries, which are mostly high-income countries.
- Data on the prevalence of 10 mental issues was obtained from the Institute for Health Metrics and Evaluation (IHME)'s Global Burden of Disease (GBD) study 2017, from which an increasing number of high-impact epidemiological studies has already been published.
- Our analysis took into account overall healthcare spending and potential outlier countries.
- The ecological design was necessary because our research questions were directly related to the association of national-level mental health prevalence and socio-economic indicators, however there is no possibility to make inferences about individuals from this dataset.
- The observational nature of our analysis means that other uncontrolled socio-cultural factors might have influenced the prevalence of mental issues in individual countries.



## **MAIN TEXT**

### **INTRODUCTION**

A significant proportion of the overall disease burden is related to mental disorders. For instance, depressive disorders and schizophrenia account for as much as 63200 and 15000 absolute Disability-Adjusted Life Year per thousand people, which makes them the second and the eleventh most burdensome disorders, respectively [1]. Suicide is also a serious global public health issue, being amongst the top twenty leading causes of death worldwide, and the second leading cause of death in young people aged 15-29 years [2]. Therefore, how to promote mental health at a wide, public health level is a crucial matter.

Following the bio-psycho-social account of mental disorders, one can say that mental health is currently promoted at 3 basic levels. First, the increasing knowledge of biological determinisms of mental illness has led to great efforts (but not necessarily successes) to destigmatise patients with a mental disorder that is beyond their control [3]. Second, psychological attributes such as confidence, agency, optimism, or resilience are now widely used to promote mental health at a public health level [4]. Third, important insights have revealed that discrimination based on socio-demographic factors such as socio-economic status, race, ethnicity, gender and sexual orientation can have a huge impact on mental health [5].

However, contrary to biological and psychological factors that are now routinely addressed by clinicians, practitioners keep struggling to meet their patients social needs. Recent accounts emphasize the need for a better awareness of the social, economical and political determinants of mental health amongst mental health practitioners [6]. Those accounts call for a better recognition of how structures (such as institutions, systems, or policies) bias social justice against certain types of people and shape symptoms and diseases – especially mental disorders. Recognizing factors that participate to structural discrimination in day-to-day practice would be crucial to advocate for the reduction of inequalities both in clinical interactions and, perhaps even more importantly, to

1  
2 promote better mental health at a public health level [7].  
3

4 In the current study, we chose to leave aside dimensions of structural discrimination related  
5 to race, gender, religion and sexual orientation to focus on country-level socio-economic status and  
6 its relationship to mental health disorders prevalence. We investigated 3 measures meant to define  
7 the social and economic status of a nation: human development, income inequalities and  
8 unemployment rate. Human development, which is composed by a measure of health, education  
9 and standard of living, aims at representing the average level of freedoms, opportunities and  
10 financial wealth of a country. Income inequalities gives insight on how wealth is distributed within a  
11 nation. Finally, unemployment rate measures the percentage of people without a professional  
12 occupation.  
13  
14  
15  
16  
17  
18  
19  
20  
21  
22

23  
24 Recent studies have suggested that relatively highly developed countries demonstrate  
25 worsened mental health when impacted by income inequalities [8–10] and unemployment [11].  
26 Although this has been of great interest to social epidemiologists, two important questions have  
27 remained unanswered. First, it is unclear whether mental health issues are differently or similarly  
28 affected by these social factors. International classifications such as the DSM or the ICD define  
29 mental disorders as a constellation of potential problems, rather than a single, unifying issue  
30 [12,13]. The question is therefore whether socio-economic indicators influence those various  
31 disorders in a different or similar manner. Given the heterogeneity of mental health problems, one  
32 would expect a differential impact of these social factors on various mental health issues, where for  
33 instance bipolar disorders would have a different relation to socio-economic indicators than  
34 schizophrenia or alcohol use disorders. On the other hand, recent accounts of mental issues have  
35 criticized the view that mental disorders were discriminable. Those accounts are based on clinical,  
36 biochemical, genetics, and cognitive neuroscience studies that have suggested fairly similar  
37 mechanisms underpinning different mental diseases such as schizophrenia, depression, anxiety  
38 disorders, and attention-deficit and hyperactivity disorders (ADHD) [14]. Following this account,  
39 one would expect that social factors would influence different mental disorders in a rather similar  
40 way.  
41  
42  
43  
44  
45  
46  
47  
48  
49  
50  
51  
52  
53  
54  
55  
56  
57  
58  
59  
60

1  
2 A second uncertainty is whether those socio-economic factors' effects on mental health are  
3 related or unrelated to each other. On the one hand, there are theoretical reasons to believe that  
4 those socio-economic factors may have a correlated impact on mental problems. A common path  
5 to mental well-being may be that of income, wealth and perhaps success, where development  
6 would relate to *average* wealth, inequalities to wealth *distribution* and unemployment to the main  
7 *source* of wealth for most people. On the other hand however, development, inequalities and  
8 unemployment usually vary in a way that is grossly uncorrelated [15]. Thus, according to this  
9 account, there is no *a priori* empirical reason to suspect that their effects on mental health are  
10 related to each other.  
11  
12  
13  
14  
15  
16  
17  
18  
19

20  
21 This study aimed at better categorizing the relations between development, inequalities,  
22 and unemployment with the prevalence of various mental health issues at the country level. To  
23 allow for comparability across populations and minimize the risk of outliers, we restricted our  
24 analyses to the 36 relatively rich countries that belong to the Organization for Economic  
25 Cooperation and Development (OECD). This choice is based on the fact that, in developing  
26 countries, mental disorders could rely on other social factors than the ones we investigated in the  
27 current study, such as human rights and inland security [16]. Likewise, there seems to be key  
28 differences between developing and developed countries in how human development affects  
29 mental health. While the prevalence of mental disorders such as depression decreases when the  
30 level of human development increases, developed countries seem to demonstrate an opposite  
31 pattern: the higher their level of development, the higher their prevalence of mental disorders [17].  
32  
33  
34  
35  
36  
37  
38  
39  
40  
41  
42  
43  
44

45 We restricted our analysis to the most common mental health disorders, that is, depressive  
46 disorders, bipolar disorders, schizophrenia, eating disorders, anxiety disorders, ADHD, alcohol use  
47 disorders, and autism spectrum disorders. As an obvious public mental health issue, we also  
48 added suicide prevalence to our analysis. Two caveats are related to the collection of prevalence  
49 data on mental disorders across countries. First, the range of epidemiological studies meant to  
50 report prevalence data are unequally distributed across issues, age groups and countries [18]. To  
51 overcome this challenge, we chose to collect data on the prevalence of mental health disorders  
52  
53  
54  
55  
56  
57  
58  
59  
60

1 from the Institute of Health Metrics & Evaluation (IHME)'s Global Burden of Disease (GBD) study  
2  
3 2017 [19]. To the best of our knowledge, this is currently the only source which produces global  
4  
5 level estimates across countries where diagnostic categories for mental health and alcohol use  
6  
7 disorders are adequately represented. Second, prevalence data could reflect, at least in part,  
8  
9 different healthcare spending across countries rather than giving a representative perspective on  
10  
11 specific differences between countries. Countries that spend a lot on healthcare would likely show  
12  
13 inflated prevalence as a result of an increased focus on mental health disorders. To overcome this  
14  
15 bias, we decided to run a second set of analysis taking into account overall healthcare spending  
16  
17 and check if results from both analyses are comparable.  
18  
19  
20  
21  
22  
23

## 24 **METHODS**

### 25 **Data series**

#### 26 Dependent variable

27  
28  
29 Prevalences of mental health issues across OECD countries were collected from the Institute of  
30  
31 Health Metrics & Evaluation (IHME)'s Global Burden of Disease (GBD) project database [19],  
32  
33 where data is estimated from a combination of surveys, medical and epidemiological data, as well  
34  
35 as meta-regression models. Data from the GBD study 2017 was released in November 2018, and  
36  
37 concern years 1990-2017. The GBD study 2017 defines prevalence as the proportion of people in  
38  
39 a population who are a case of a disease, injury or sequela. All results in GBD refer to point  
40  
41 prevalence.  
42  
43  
44  
45  
46

47 Data was extracted for year 2017 for a combination of mental health disorders and the  
48  
49 specific following issues: depressive disorders, anxiety disorders, schizophrenia, bipolar disorders,  
50  
51 eating disorders, alcohol use disorders, ADHD, autism spectrum disorders and suicide (**Table 1**).  
52  
53 Note that suicide did not include non-fatal self-harm.  
54  
55

56 Prevalence data was age standardized, which allowed comparability across populations  
57  
58 when their age profiles were different. Data was calculated in relation to the entire population.  
59  
60

1  
2 Extracted data did not necessitate any further transformation and was ready to be used.  
3  
4  
5  
6

### 7 Independent variables

8

9 Each country's level of human development was measured with the Human Development Index  
10 (HDI; range: 0-1). The HDI summarizes life expectancy, a combination of adult literacy rate and  
11 school enrolment rate, and gross domestic product per capita at purchasing power parity [20].  
12  
13  
14

15  
16 For each country, income inequality was measured using the GINI index (range: 0-1), which  
17 intends to represent a nation's income distribution [21]. A GINI coefficient of 0 means that the  
18 country income is perfectly equally distributed. A GINI coefficient of 1 means that all the country's  
19 income is received by just one person.  
20  
21  
22

23  
24 Our third socio-economic indicator was unemployment rate, which measures the rate of  
25 unemployment as a percentage of the labour force [22].  
26  
27  
28

29 Data for the three predictors was collected from the OECD database except for HDI, which  
30 was retrieved from the United Nations Development Programme database (**Table 1**). Data was  
31 extracted for year 2016, except when unavailable, in which case data was extracted for the closest  
32 year previous to 2016 (year range for data collection: 2014-2016).  
33  
34  
35  
36

37 Source data for all 36 OECD countries is available at  
38 <https://data.mendeley.com/datasets/xcycfh96x5/1>. There was no missing data. For each indicator  
39 (dependent and independent variables), atypical countries were defined as having a z-score  
40 greater than 3 or below -3 (**Table 1**).  
41  
42  
43  
44  
45  
46  
47  
48  
49

50 -----  
51  
52 *Table 1 about here*  
53  
54 -----  
55  
56  
57  
58  
59  
60

## Statistical Analysis

We ran multiple regression linear models where the prevalence of a mental issue across OECD countries is predicted by the HDI, GINI index, and unemployment rate. Extreme outliers were defined as data points with Cook's distance  $> 1$  [23]. Using this cut-off, we were not able to identify any outliers when running our linear models.

For each mental health issue, we then converted each of the socio-economic indicators' t statistic into their corresponding effect size (Pearson's  $r_{\text{HDI}}$ ,  $r_{\text{GINI}}$ ,  $r_{\text{unemploy}}$ ). We then computed 2x2 Pearson's correlation coefficients between those 3 variables ( $r_{\text{HDI-GINI}}$ ,  $r_{\text{HDI-unemploy}}$ ,  $r_{\text{unemploy-GINI}}$ ) to estimate their pairwise relationships across all mental health problems. Finally, to investigate the linear dependency between the 3 indicators' effect sizes, we ran principal component analysis and obtained explained variance for the first principal component.

An important caveat when collecting mental health data at the country level is that prevalence could reflect healthcare spending (which allows for more focus on mental health disorders) rather than giving a representative perspective on differences between countries. For our data, Pearson's  $r$  between combined mental health disorders prevalence and healthcare spending as measured by price per capita at purchasing power parity (obtained from the OECD database [24]) was of 0.58 ( $p < 0.001$ ). To check that our results were not impacted by overall healthcare expenditures, we decided to regress out the influence of healthcare spending on the prevalence of each mental health issue and to re-run our analysis using the residuals as dependent variables. Finally, to check that our results were not too influenced by outliers, we also ran our analysis using robust regression methods.

To run these analyses, we used R 3.6.1.

## Patient and public involvement

1  
2 No patients were involved in this study.  
3

## 4 **RESULTS**

5  
6  
7 Multiple linear regression models performed on the prevalence of a combination of mental health  
8 disorders revealed that the effect of development ( $r_{\text{HDI}}$ ), inequalities ( $r_{\text{GINI}}$ ) and unemployment  
9 ( $r_{\text{unemploy}}$ ) was large ( $r$  range: 0.51-0.76). However they demonstrated great variation when  
10 measured amongst different mental health issues ( $r$  range: -0.34 to 0.74; **Table 2 and**  
11 **Supplementary Table 1**), the most prominent being no positive effect on suicide and alcohol use  
12 disorders, and a larger effect on other mental disorders. Regarding the latter, development had a  
13 strong effect ( $r > 0.65$ ) on the prevalence of each disorder apart from bipolar disorders and ADHD  
14 ( $r < 0.43$ ); income inequalities had at least a moderate effect ( $r > 0.40$ ) on the prevalence of each  
15 disorder apart from bipolar disorders and ADHD ( $r < 0.30$ ); and unemployment had a moderate  
16 effect on depressive and eating disorders ( $r > 0.42$ ), and only a small effect on autism spectrum  
17 disorders and schizophrenia ( $r < 0.18$ ) (**Table 2**).  
18  
19  
20  
21  
22  
23  
24  
25  
26  
27  
28  
29

30  
31 Across mental issues, the socio-economic indicators' effect sizes were strongly related to  
32 each other (Pearson's  $r_{\text{HDI-GINI}}=0.93$ ,  $r_{\text{HDI-unemploy}}=0.81$ ,  $r_{\text{unemploy-GINI}}=0.84$ ). Principal component  
33 analysis demonstrated that the first principal component of the three variables ( $r_{\text{HDI}}$ ,  $r_{\text{GINI}}$ ,  $r_{\text{unemploy}}$ )  
34 explained 91.5% of the variance ( $p=0$ , permutation test with 1000 repetitions).  
35  
36  
37  
38  
39

40 -----  
41  
42 *Table 2 about here*  
43  
44 -----  
45  
46  
47  
48  
49

50 Finally, note that re-running our analysis after controlling for overall healthcare spending  
51 across countries and using robust method to control for outliers clearly reproduced this pattern of  
52 results (**Supplementary Results; Supplementary Tables 2 and 3**).  
53  
54  
55  
56  
57  
58  
59  
60

## DISCUSSION

This study aimed at clarifying the relationship between mental health and three socio-economic factors: human development, income inequalities and unemployment. We first demonstrated that, amongst OECD countries, the strength of the relationship between the prevalence of mental health issues with development, inequalities and unemployment, was large for a combination of disorders. This confirms the abundant literature showing a positive association between mental issues with inequalities [9] and unemployment [25,26] for a whole range of mental disorders. More generally, the social science literature is unequivocal as per the association between a country's socio-economic status and health across the life span. Indeed, other studies have demonstrated a strong impact of socio-ecological measures of wealth (e.g. salary, pension), income inequalities, education, and employment on overall health outcomes such as life expectancy, healthy life expectancy, and adolescent health [27–31]. Taking this a step further, our study adds one more argument for the implementation of public health policies expected to counter the devastating effect of inequalities and unemployment [10,32,33].

Aside from the effect of inequalities and unemployment on mental health, that of human development is less straightforward. On the one hand, research has shown that development was accompanied with better mental health [34]. Human development clearly promotes health and wellbeing, for instance by reducing mortality due to infectious diseases thanks to vaccination programmes and antibiotics use; but also by encouraging education, innovations, freedom and opportunities. On the other hand, others have demonstrated an opposite relationship between mental health and human development, with mental disorders prevalence paradoxically increasing with the level of human development [17]. The relationship between human development and mental health found in the current study was clearly of that kind, and this relationship was not related to overall healthcare spending. Some have interpreted this deleterious effect of development on mental health as a potential reflection of the mutation of social values towards less social integration and regulation in modern societies [35,36]. In fact, the relationship between



1  
2 human development and mental health disorders prevalence may follow a U-shape curve, with a  
3  
4 negative relationship (less mental disorders when development increases) for developing  
5  
6 countries, and a positive relationship (more mental disorders when development increases) for  
7  
8 developed countries. Further studies should continue to investigate this association at a more fine-  
9  
10 grained level, using for instance multilevel models, to better decipher the effect of human  
11  
12 development on mental health in developing and developed countries.  
13  
14

15  
16 In the current study, we were also interested in whether the association between mental  
17  
18 health with human development, income inequalities, and unemployment varies across mental  
19  
20 issues; and whether the three socio-economic factors' effects on mental health are related to each  
21  
22 other. As a second important result of our study, we demonstrated that the association between  
23  
24 mental issues and the three socio-economic factors was in fact relative to each mental health  
25  
26 issue. Non-addictive mental health disorders tested in this study were clearly associated to these  
27  
28 social factors, though to various degrees. Hypotheses on how each of those mental issues  
29  
30 specifically relies to development, inequalities and unemployment are beyond the scope of this  
31  
32 study and are open to further empirical testing. In contrast, development, inequalities and  
33  
34 unemployment did not negatively impact suicide and alcohol use disorders. This seems to  
35  
36 contradict within-country studies that have demonstrated that inequalities and unemployment both  
37  
38 affect suicide and alcohol use disorders prevalence [37–41]. In fact, both issues are also thought to  
39  
40 be strongly influenced by other socio-cultural factors that vary independently from development,  
41  
42 inequalities and unemployment. For instance, long-term unemployment [42] or work stress [43]  
43  
44 have been associated to suicide, while religion [44,45], connectedness and neighbourhood  
45  
46 conditions [46] are known protective factors against extreme behaviours. Overall, those additional  
47  
48 factors, untested in this study, may have masked the effect of development, inequalities and  
49  
50 unemployment on suicide and alcohol use.  
51  
52

53  
54 A third important finding of our study is that the socio-economic factors' effects on mental  
55  
56 health are strongly related to each other. This suggests that they share an underlying common  
57  
58 pathway. As such, they could pertain to a so-called social structure that would influence and  
59  
60

1  
2 restrict the choices and opportunities available to people [47] and tend to bias an overall society  
3  
4 towards better, or worse, mental health. In modern societies, development, inequalities and  
5  
6 unemployment can all be viewed as indicators of key cultural values and norms important for social  
7  
8 inclusion and cohesion. Such values and norms participate to some of the core features of  
9  
10 capitalist systems: accumulation, competition and labour wages. That is, a high level of  
11  
12 development sets priorities for people to reach a high threshold of desired outcomes in terms of  
13  
14 education, health or financial wealth [48]. Likewise, greater income inequalities can shape attitudes  
15  
16 towards reaching a higher social position compared to others [49]. Finally, the value of an  
17  
18 employment position in this context is both material (it gives a source of income) and socio-cultural  
19  
20 (not having a job is typically perceived as being a failure in the society). Overall, these social  
21  
22 factors' unifying feature may be their underlying pressure for success, which in turn could explain  
23  
24 their negative impact on mental health.  
25  
26  
27  
28  
29

### 30 **Limitations**

31  
32  
33 First, because our research questions were directly related to the association of national-level  
34  
35 mental health prevalence and socio-economic indicators, we considered the ecological design the  
36  
37 most appropriate for our study [8]. However, the observational nature of our analysis implies that  
38  
39 other uncontrolled socio-cultural factors might have influenced the prevalence of mental issues in  
40  
41 individual countries. We obviously need to be careful about any over-interpretation of our results as  
42  
43 demonstrating causality while our models can only be predictive.  
44  
45

46 A second potential limitation of this study is the so-called ecological fallacy, that is, making  
47  
48 inferences on individual risk from analysis made on aggregate data [50]. Based on this study  
49  
50 results, one cannot draw conclusions about the specific nature of individuals (e.g. their socio-  
51  
52 economic status) who suffer from mental health issues. To solve this question, one would need to  
53  
54 design a multilevel study where socio-economic status at the individual level and at the country  
55  
56 level would be entered as two-level predictors.  
57  
58

59 Third, it is likely that the effect of development, inequalities, and unemployment is different  
60

1  
2 across non-OECD countries and especially low and middle income countries. For instance, and as  
3  
4 mentioned above, human development would have more of a beneficial effect on mental health in  
5  
6 such developing countries [34]. That said, as most of the European and North American  
7  
8 populations were included in the current study, our results are probably generalizable to western  
9  
10 countries.

## 11 12 13 14 15 16 **Conclusion**

17  
18 Despite those limitations, these results implore a re-analysis of the socio-economic determinants of  
19  
20 mental health where: 1) the heterogeneity of mental health issues would be taken into account;  
21  
22 and 2) each socio-economic indicator's effect would be analysed and interpreted in conjunction  
23  
24 with the others.  
25  
26  
27  
28  
29  
30  
31  
32

## 33 **DECLARATION OF INTEREST**

34  
35 The authors have no biomedical financial interests or potential conflicts of interest.  
36  
37  
38

## 39 **FUNDING**

40  
41 This research received no specific grant from any funding agency, commercial or not-for-profit  
42  
43 sectors.  
44  
45  
46  
47

## 48 **AUTHOR CONTRIBUTION**

49  
50 All authors were involved in drafting the article or revising it critically for important intellectual  
51  
52 content, and have read and approved the final version of the manuscript. G.B. and N.F. designed  
53  
54 the study. G.B. gathered the data. G.B. and N.F. analysed the data and wrote the paper.  
55  
56  
57

## 58 **DATA AVAILABILITY**

1  
2  
3  
4  
5  
6  
7  
8  
9  
10  
11  
12  
13  
14  
15  
16  
17  
18  
19  
20  
21  
22  
23  
24  
25  
26  
27  
28  
29  
30  
31  
32  
33  
34  
35  
36  
37  
38  
39  
40  
41  
42  
43  
44  
45  
46  
47  
48  
49  
50  
51  
52  
53  
54  
55  
56  
57  
58  
59  
60

Data are available in a public, open access repository  
(<https://data.mendeley.com/datasets/xcycfh96x5/1>).

For peer review only

1  
2  
3  
4  
5  
6  
7  
8  
9  
10  
11  
12  
13  
14  
15  
16  
17  
18  
19  
20  
21  
22  
23  
24  
25  
26  
27  
28  
29  
30  
31  
32  
33  
34  
35  
36  
37  
38  
39  
40  
41  
42  
43  
44  
45  
46  
47  
48  
49  
50  
51  
52  
53  
54  
55  
56  
57  
58  
59  
60  
**REFERENCES**

- 1 Silberberg D, Anand NP, Michels K, *et al*. Brain and other nervous system disorders across the lifespan—global challenges and opportunities. *Nature* 2015;**527**:S151.
- 2 World Health Organization. Suicide in the world: global health estimates. World Health Organization 2019.
- 3 Schomerus G, Schwahn C, Holzinger A, *et al*. Evolution of public attitudes about mental illness: a systematic review and meta-analysis. *Acta Psychiatr Scand* 2012;**125**:440–452.
- 4 Kobau R, Seligman ME, Peterson C, *et al*. Mental health promotion in public health: Perspectives and strategies from positive psychology. *Am J Public Health* 2011;**101**:e1–e9.
- 5 Bourgois P, Holmes SM, Sue K, *et al*. Structural vulnerability: operationalizing the concept to address health disparities in clinical care. *Acad Med J Assoc Am Med Coll* 2017;**92**:299.
- 6 Metzlj JM, Hansen H. Structural competency and psychiatry. *JAMA Psychiatry* 2018;**75**:115–116.
- 7 Metzlj JM, Petty J, Olowojoba OV. Using a structural competency framework to teach structural racism in pre-health education. *Soc Sci Med* 2018;**199**:189–201.
- 8 Wilkinson RG, Pickett KE. Income inequality and social dysfunction. *Annu Rev Sociol* 2009;**35**:493–511.
- 9 Ribeiro WS, Bauer A, Andrade MCR, *et al*. Income inequality and mental illness-related morbidity and resilience: a systematic review and meta-analysis. *Lancet Psychiatry* 2017;**4**:554–562.
- 10 Patel V, Burns JK, Dhingra M, *et al*. Income inequality and depression: a systematic review and meta-analysis of the association and a scoping review of mechanisms. *World Psychiatry* 2018;**17**:76–89.
- 11 Stuckler D, Basu S, Suhrcke M, *et al*. The public health effect of economic crises and alternative policy responses in Europe: an empirical analysis. *The Lancet* 2009;**374**:315–323.
- 12 American Psychiatric Association. *Diagnostic and statistical manual of mental disorders (DSM-5®)*. American Psychiatric Pub 2013.
- 13 World Health Organization. *The ICD-10 classification of mental and behavioural disorders: clinical descriptions and diagnostic guidelines*. Geneva: World Health Organization 1992.
- 14 Fried EI. Problematic assumptions have slowed down depression research: why symptoms, not syndromes are the way forward. *Front Psychol* 2015;**6**:309.
- 15 Ranis G, Stewart F, Samman E. Human development: beyond the human development index. *J Hum Dev* 2006;**7**:323–358.
- 16 Joop TV, De Jong M. Public mental health, traumatic stress and human rights violations in low-income countries. In: *Trauma, war, and violence: Public mental health in socio-cultural context*. Springer 2002. 1–91.
- 17 Cifuentes M, Sembajwe G, Tak S, *et al*. The association of major depressive episodes with income inequality and the human development index. *Soc Sci Med* 2008;**67**:529–539.

- 1  
2 18 Whiteford H, Ferrari A, Degenhardt L. Global burden of disease studies: implications for mental  
3 and substance use disorders. *Health Aff (Millwood)* 2016;**35**:1114–1120.
- 4  
5 19 Global Burden of Disease Collaborative Network. Global Burden of Disease Study 2017 (GBD  
6 2017) Incidence, Prevalence, and Years Lived with Disability 1990-2017. Seattle, United  
7 States: Institute for Health Metrics and Evaluation (IHME), 2018.  
8 [https://www.google.com/search?q=Global+Burden+of+Disease+Collaborative+Network.+Global+Burden+of+Disease+Study+2017+\(GBD+2017\)+Incidence%2C+Prevalence%2C+and+Years+Lived+with+Disability+1990-2017.+Seattle%2C+United+States%3A+Institute+for+Health+Metrics+and+Evaluation+\(IHME\)%2C+2018.&rlz=1C1CHBD\\_enNZ738NZ739&oq=Global+Burden+of+Disease+Collaborative+Network.+Global+Burden+of+Disease+Study+2017+\(GBD+2017\)+Incidence%2C+Prevalence%2C+and+Years+Lived+with+Disability+1990-2017.+Seattle%2C+United+States%3A+Institute+for+Health+Metrics+and+Evaluation+\(IHME\)%2C+2018.&aqs=chrome..69i57j260j0j4&sourceid=chrome&ie=UTF-8](https://www.google.com/search?q=Global+Burden+of+Disease+Collaborative+Network.+Global+Burden+of+Disease+Study+2017+(GBD+2017)+Incidence%2C+Prevalence%2C+and+Years+Lived+with+Disability+1990-2017.+Seattle%2C+United+States%3A+Institute+for+Health+Metrics+and+Evaluation+(IHME)%2C+2018.&rlz=1C1CHBD_enNZ738NZ739&oq=Global+Burden+of+Disease+Collaborative+Network.+Global+Burden+of+Disease+Study+2017+(GBD+2017)+Incidence%2C+Prevalence%2C+and+Years+Lived+with+Disability+1990-2017.+Seattle%2C+United+States%3A+Institute+for+Health+Metrics+and+Evaluation+(IHME)%2C+2018.&aqs=chrome..69i57j260j0j4&sourceid=chrome&ie=UTF-8)  
9  
10  
11  
12  
13  
14  
15  
16  
17  
18
- 19 20 United Nations Development Programme. Human Development Index. U. N. Hum. Dev. Rep.  
20 2019.<http://hdr.undp.org/en/indicators/137506#>
- 21 21 the OECD. Income inequality. OECD Data. [http://data.oecd.org/inequality/income-](http://data.oecd.org/inequality/income-inequality.htm)  
22 [inequality.htm](http://data.oecd.org/inequality/income-inequality.htm)
- 23 22 the OECD. Unemployment rate. OECD Data. [http://data.oecd.org/unemp/unemployment-](http://data.oecd.org/unemp/unemployment-rate.htm)  
24 [rate.htm](http://data.oecd.org/unemp/unemployment-rate.htm)
- 25 23 Cook RD. Detection of influential observation in linear regression. *Technometrics* 1977;**19**:15–  
26 18.
- 27 24 the OECD. Health spending. OECD Data. <http://data.oecd.org/healthres/health-spending.htm>  
28 (accessed 21 Sep 2019).
- 29 25 Paul KI, Moser K. Unemployment impairs mental health: Meta-analyses. *J Vocat Behav*  
30 2009;**74**:264–282.
- 31 26 Artazcoz L, Benach J, Borrell C, *et al*. Unemployment and Mental Health: Understanding the  
32 Interactions Among Gender, Family Roles, and Social Class. *Am J Public Health* 2004;**94**:82–  
33 8. doi:10.2105/AJPH.94.1.82
- 34 27 Kim JI, Kim G. Effects on inequality in life expectancy from a social ecology perspective. *BMC*  
35 *Public Health* 2018;**18**:243.
- 36 28 Kim JI, Kim G. Socio-ecological perspective of older age life expectancy: income, gender  
37 inequality, and financial crisis in Europe. *Glob Health* 2017;**13**:58.
- 38 29 Kim JI, Kim G. Relationship between the remaining years of healthy life expectancy in older  
39 age and National Income Level, educational attainment, and improved water quality. *Int J*  
40 *Ageing Hum Dev* 2016;**83**:402–417.
- 41 30 Kim JI, Kim G. Labor force participation and secondary education of gender inequality index  
42 (GII) associated with healthy life expectancy (HLE) at birth. *Int J Equity Health* 2014;**13**:106.
- 43 31 Elgar FJ, Pfortner T-K, Moor I, *et al*. Socioeconomic inequalities in adolescent health 2002–  
44 2010: a time-series analysis of 34 countries participating in the Health Behaviour in School-  
45 aged Children study. *The Lancet* 2015;**385**:2088–2095.
- 46 32 Pickett KE, Wilkinson RG. *Immorality of inaction on inequality*. British Medical Journal

1  
2 Publishing Group 2017.

- 3  
4 33 Friedman EA, Gostin LO, Kavanagh MM, *et al.* Putting health equity at heart of universal  
5 coverage-the need for national programmes of action. *BMJ* 2019;**367**:l5901.  
6 doi:10.1136/bmj.l5901  
7
- 8 34 Lund C, Breen A, Flisher AJ, *et al.* Poverty and common mental disorders in low and middle  
9 income countries: A systematic review. *Soc Sci Med* 2010;**71**:517–528.  
10
- 11 35 Böhnke P. Poverty and social integration in the enlarged Europe. WZB Discussion Paper 2007.  
12
- 13 36 Lester BY. Learnings from Durkheim and beyond: the economy and suicide. *Suicide Life*  
14 *Threat Behav* 2001;**31**:15–31.  
15
- 16 37 Elgar FJ, Roberts C, Parry-Langdon N, *et al.* Income inequality and alcohol use: a multilevel  
17 analysis of drinking and drunkenness in adolescents in 34 countries. *Eur J Public Health*  
18 2005;**15**:245–50. doi:10.1093/eurpub/cki093  
19
- 20 38 Lorant V, Kunst AE, Huisman M, *et al.* Socio-economic inequalities in suicide: A European  
21 comparative study. *Br J Psychiatry* 2005;**187**:49–54. doi:10.1192/bjp.187.1.49  
22
- 23 39 Janlert U, Hammarström A. Alcohol consumption among unemployed youths: results from a  
24 prospective study. *Br J Addict* 1992;**87**:703–14. doi:10.1111/j.1360-0443.1992.tb02716.x  
25
- 26 40 Kposowa AJ. Unemployment and suicide: a cohort analysis of social factors predicting suicide  
27 in the US National Longitudinal Mortality Study. *Psychol Med* 2001;**31**:127–38.  
28 doi:10.1017/S0033291799002925  
29
- 30 41 Reeves A, McKee M, Stuckler D. Economic suicides in the Great Recession in Europe and  
31 North America. *Br J Psychiatry* 2014;**205**:246–7. doi:10.1192/bjp.bp.114.144766  
32
- 33 42 Milner A, Page A, LaMontagne AD. Duration of unemployment and suicide in Australia over the  
34 period 1985–2006: an ecological investigation by sex and age during rising versus declining  
35 national unemployment rates. *J Epidemiol Community Health* 2013;**67**:237–44.  
36 doi:10.1136/jech-2012-201594  
37
- 38 43 Boxer PA, Burnett C, Swanson N. Suicide and occupation: a review of the literature. *J Occup*  
39 *Environ Med* 1995;**37**:442–52.  
40
- 41 44 Kleiman EM, Liu RT. Prospective prediction of suicide in a nationally representative sample:  
42 religious service attendance as a protective factor. *Br J Psychiatry* 2014;**204**:262–6.  
43 doi:10.1192/bjp.bp.113.128900  
44
- 45 45 Hodge DR, Cardenas P, Montoya H. Substance use: Spirituality and religious participation as  
46 protective factors among rural youths. *Soc Work Res* 2001;**25**:153–61.  
47 doi:10.1093/swr/25.3.153  
48
- 49 46 Oman RF, Vesely SK, Aspy CB, *et al.* A Longitudinal Study of Youth Assets, Neighborhood  
50 Conditions, and Youth Sexual Behaviors. *J Adolesc Health* 2013;**52**:779–85.  
51 doi:10.1016/j.jadohealth.2012.12.005  
52
- 53 47 Barker C. *The Sage dictionary of cultural studies*. Sage 2004.  
54
- 55 48 James O. *Affluenza—a contagious middle class virus causing depression, anxiety, addiction*  
56 *and ennui*. Random House, London 2007.  
57  
58  
59  
60

1  
2  
3  
4  
5  
6  
7  
8  
9  
10  
11  
12  
13  
14  
15  
16  
17  
18  
19  
20  
21  
22  
23  
24  
25  
26  
27  
28  
29  
30  
31  
32  
33  
34  
35  
36  
37  
38  
39  
40  
41  
42  
43  
44  
45  
46  
47  
48  
49  
50  
51  
52  
53  
54  
55  
56  
57  
58  
59  
60

49 Pickett K, Wilkinson R. *The Spirit Level: Why Equality is Better for Everyone*. Penguin UK 2010.

50 Piantadosi S, Byar DP, Green SB. The ecological fallacy. *Am J Epidemiol* 1988;**127**:893–904.

For peer review only



**TABLES****Table 1. Descriptive statistics for dependent and independent variables (N=36).**

| Variable                                                        | Range       | Mean  | Population-weighted mean | Standard Deviation | Atypical countries <sup>b</sup> |
|-----------------------------------------------------------------|-------------|-------|--------------------------|--------------------|---------------------------------|
| Prevalence of combined mental health disorders <sup>a</sup> (%) | 10.87-18.71 | 14.28 | 14.76                    | 2.13               | None                            |
| Prevalence of Autism Spectrum Disorders (%)                     | 0.36-0.94   | 0.60  | 0.65                     | 0.12               | None                            |
| Prevalence of ADHD (%)                                          | 0.43-2.53   | 1.15  | 1.13                     | 0.40               | Australia (2.53%)               |
| Prevalence of Depressive Disorders (%)                          | 2.25-4.84   | 3.71  | 3.89                     | 0.65               | None                            |
| Prevalence of Schizophrenia (%)                                 | 0.20-0.36   | 0.26  | 0.28                     | 0.05               | None                            |
| Prevalence of Anxiety Disorders (%)                             | 2.94-8.50   | 4.93  | 5.19                     | 1.46               | None                            |
| Prevalence of Eating Disorders (%)                              | 0.23-0.94   | 0.48  | 0.48                     | 0.18               | None                            |
| Prevalence of Alcohol Use Disorders (%)                         | 0.46-4.71   | 1.84  | 1.56                     | 0.99               | None                            |
| Prevalence of Suicide (per 100.000)                             | 3.31-27.99  | 10.89 | 10.66                    | 4.75               | Lithuania (27.99 per 100.000)   |
| Prevalence of Bipolar Disorders (%)                             | 0.57-1.21   | 0.86  | 0.79                     | 0.15               | None                            |
| HDI                                                             | 0.77-0.95   | 0.89  | 0.89                     | 0.04               | None                            |
| GINI index                                                      | 0.24-0.46   | 0.32  | 0.36                     | 0.05               | None                            |
| Unemployment rate (%)                                           | 2.97-23.54  | 7.41  | 6.46                     | 4.20               | Greece (23.54%)                 |

<sup>a</sup> this includes Autism Spectrum Disorders, ADHD, Conduct Disorders, Idiopathic developmental intellectual disability, Depressive disorders, Schizophrenia, Anxiety disorders, Eating disorder and Bipolar disorders.

<sup>b</sup> whose z-score is greater than 3 or below -3.

**Table 2: Effects of human development, income inequalities and unemployment on the prevalence of 10 mental health issues across OECD countries (N=36).**

| Pearson's r           | Combined | ASD  | ADHD | DEP  | SCZ  | ANX  | ED   | ETOH  | SUICIDE | BD   |
|-----------------------|----------|------|------|------|------|------|------|-------|---------|------|
| $r_{\text{HDI}}$      | 0.76     | 0.74 | 0.21 | 0.68 | 0.72 | 0.65 | 0.74 | -0.27 | -0.07   | 0.43 |
| $r_{\text{GINI}}$     | 0.59     | 0.46 | 0.30 | 0.59 | 0.49 | 0.40 | 0.45 | -0.10 | -0.07   | 0.14 |
| $r_{\text{unemploy}}$ | 0.51     | 0.15 | 0.27 | 0.42 | 0.18 | 0.29 | 0.45 | -0.18 | -0.34   | 0.30 |

“Combined”: combination of Autism Spectrum Disorders, Attention-Deficit/Hyperactivity Disorders, Conduct Disorders, Idiopathic developmental intellectual disability, Depressive disorders, Schizophrenia, Anxiety disorders, Eating disorder and Bipolar disorders; “ASD”: Autism Spectrum Disorders; “ADHD”: Attention-Deficit/Hyperactivity Disorders; “DEP”: Depressive Disorders; “SCZ”: Schizophrenia; “ANX”: Anxiety Disorders; “ED”: Eating Disorders; “ETOH”: Alcohol Use Disorders; “SUICIDE”: suicide rates; “BD”: Bipolar Disorders.

## SUPPLEMENTARY MATERIAL

### SUPPLEMENTARY RESULTS

#### Analysis taking into account overall healthcare spending

To ensure that our results were not impacted by overall healthcare expenditures, we decided to regress out the influence of healthcare spending on the prevalence of each mental health issue and to re-run our analysis using the residuals as dependent variables. When performed on a combination of mental health disorders, multiple linear regression models revealed that the effect of development ( $r_{\text{HDI}}$ ), inequalities ( $r_{\text{GINI}}$ ) and unemployment ( $r_{\text{unemploy}}$ ) was medium to large ( $r$  range: 0.47-0.54). However they demonstrated great variation when performed amongst different mental health issues ( $r$  range: -0.34 to 0.52, **Supplementary Table 2**).

Across mental issues, the socio-economic indicators' effect sizes were strongly related to each other ( $r_{\text{HDI-GINI}}=0.89$ ,  $r_{\text{HDI-unemploy}}=0.93$ ,  $r_{\text{unemploy-GINI}}=0.87$ ). Principal component analysis demonstrated that the first principal component of the three variables ( $r_{\text{HDI}}$ ,  $r_{\text{GINI}}$ ,  $r_{\text{unemploy}}$ ) explained 94% of the variance ( $p=0$ , permutation test with 1000 repetitions).

Therefore, this analysis yield similar results than that reported in the main text.

#### Analysis using robust regression methods

To ensure that our results were not impacted by outliers, we re-ran our analyses using robust regression methods [1]. We used the `lmrob` function from the `robustbase` package in R (version 3.6.1), which computes fast MM-type estimators for linear regression models. We sat the default arguments as suggested in Koller and Stahel (2011) with an initial S-estimate, followed by an M-estimate, a Design Adaptive Scale estimate and a final M-step; and a “linear quadratic quadratic” (lqq for short) psi function [2].

When performed on a combination of mental health disorders, multiple linear regression

1  
2 models revealed that the effect of development ( $r_{\text{HDI}}$ ), inequalities ( $r_{\text{GINI}}$ ) and unemployment  
3  
4 ( $r_{\text{unemploy}}$ ) was medium to large ( $r$  range: 0.44-0.59). However they demonstrated great variation  
5  
6 when performed amongst different mental health issues ( $r$  range: -0.43 to 0.55, **Supplementary**  
7  
8 **Table 3**). Across mental issues, the socio-economic indicators' effect sizes were strongly related to  
9  
10 each other ( $r_{\text{HDI-GINI}}=0.93$ ,  $r_{\text{HDI-unemploy}}=0.87$ ,  $r_{\text{unemploy-GINI}}=0.91$ ). Principal component analysis  
11  
12 demonstrated that the first principal component of the three variables ( $r_{\text{HDI}}$ ,  $r_{\text{GINI}}$ ,  $r_{\text{unemploy}}$ ) explained  
13  
14 94% of the variance ( $p=0$ , permutation test with 1000 repetitions).  
15  
16

17 Therefore, results using robust linear regression methods were highly comparable to those  
18  
19 using non-robust methods.  
20  
21  
22  
23  
24  
25  
26  
27  
28  
29  
30  
31  
32  
33  
34  
35  
36  
37  
38  
39  
40  
41  
42  
43  
44  
45  
46  
47  
48  
49  
50  
51  
52  
53  
54  
55  
56  
57  
58  
59  
60

1  
2  
3 **SUPPLEMENTARY TABLES**  
4  
5

6 **Supplementary Table 1. Summary statistics of multiple linear regression models run on the**  
7 **prevalence of 10 mental health issues (N=36).**  
8

| Predictor                                        | Estimator coefficient | 95% Confidence interval | T value | Effect size (Pearson's r) | P value   |
|--------------------------------------------------|-----------------------|-------------------------|---------|---------------------------|-----------|
| <b>Combined mental health issues<sup>a</sup></b> |                       |                         |         |                           |           |
| HDI                                              | 45.9                  | 31.8 to 60.1            | 6.6     | 0.76                      | 0.0000002 |
| GINI index                                       | 22.1                  | 11.2 to 33.0            | 4.1     | 0.59                      | 0.0002    |
| Unemployment                                     | 0.2                   | 0.08 to 0.3             | 3.3     | 0.51                      | 0.002     |
| <b>Autism Spectrum Disorder</b>                  |                       |                         |         |                           |           |
| HDI                                              | 2.5                   | 1.7 to 3.3              | 6.3     | 0.74                      | 0.0000005 |
| GINI index                                       | 0.9                   | 0.3 to 1.5              | 3.0     | 0.46                      | 0.006     |
| Unemployment                                     | 0.003                 | -0.004 to 0.01          | 0.8     | 0.15                      | 0.4       |
| <b>ADHD</b>                                      |                       |                         |         |                           |           |
| HDI                                              | 2.3                   | -1.6 to 6.1             | 1.2     | 0.21                      | 0.2       |
| GINI index                                       | 2.6                   | -0.4 to 5.6             | 1.8     | 0.30                      | 0.09      |
| Unemployment                                     | 0.03                  | -0.007 to 0.06          | 1.6     | 0.27                      | 0.1       |
| <b>Depressive Disorders</b>                      |                       |                         |         |                           |           |
| HDI                                              | 12.3                  | 7.6 to 17.1             | 5.2     | 0.68                      | 0.000009  |
| GINI index                                       | 7.5                   | 3.9 to 11.2             | 4.2     | 0.59                      | 0.0002    |
| Unemployment                                     | 0.05                  | 0.01 to 0.09            | 2.6     | 0.42                      | 0.01      |
| <b>Schizophrenia</b>                             |                       |                         |         |                           |           |
| HDI                                              | 1.0                   | 0.6 to 1.3              | 5.8     | 0.72                      | 0.000002  |
| GINI index                                       | 0.4                   | 0.1 to 0.7              | 3.1     | 0.49                      | 0.004     |
| Unemployment                                     | 0.001                 | -0.001 to 0.004         | 1.0     | 0.18                      | 0.3       |
| <b>Anxiety Disorders</b>                         |                       |                         |         |                           |           |
| HDI                                              | 27.4                  | 15.9 to 38.9            | 4.9     | 0.65                      | 0.00003   |
| GINI index                                       | 10.6                  | 1.7 to 19.4             | 2.4     | 0.40                      | 0.02      |
| Unemployment                                     | 0.08                  | -0.02 to 0.2            | 1.7     | 0.29                      | 0.1       |
| <b>Eating Disorders</b>                          |                       |                         |         |                           |           |
| HDI                                              | 3.7                   | 2.5 to 4.9              | 6.2     | 0.74                      | 0.0000005 |
| GINI index                                       | 1.3                   | 0.4 to 2.2              | 2.8     | 0.45                      | 0.008     |
| Unemployment                                     | 0.01                  | 0.004 to 0.02           | 2.8     | 0.45                      | 0.008     |
| <b>Alcohol Use Disorders</b>                     |                       |                         |         |                           |           |
| HDI                                              | -7.6                  | -17.5 to 2.3            | -1.6    | -0.27                     | 0.1       |
| GINI index                                       | -2.1                  | -9.7 to 5.5             | -0.6    | -0.10                     | 0.6       |
| Unemployment                                     | -0.04                 | -0.1 to 0.04            | -1.0    | -0.18                     | 0.3       |

Supplementary Table 1 continued

| Predictor                | Estimator coefficient | 95% Confidence interval | T value | Effect size (Pearson's r) | P value |
|--------------------------|-----------------------|-------------------------|---------|---------------------------|---------|
| <b>Suicide</b>           |                       |                         |         |                           |         |
| HDI                      | -9.1                  | -55.6 to 37.4           | -0.4    | -0.07                     | 0.7     |
| GINI index               | -6.8                  | -42.6 to 28.9           | -0.4    | -0.07                     | 0.7     |
| Unemployment             | -0.4                  | -0.8 to 0.0005          | -2.0    | -0.34                     | 0.05    |
| <b>Bipolar Disorders</b> |                       |                         |         |                           |         |
| HDI                      | 1.8                   | 0.4 to 3.2              | 2.7     | 0.43                      | 0.01    |
| GINI index               | 0.4                   | -0.6 to 1.5             | 0.8     | 0.14                      | 0.4     |
| Unemployment             | 0.01                  | -0.001 to 0.02          | 1.8     | 0.30                      | 0.08    |

<sup>a</sup> this includes Autism Spectrum Disorders, ADHD, Conduct Disorders, Idiopathic developmental intellectual disability, Depressive disorders, Schizophrenia, Anxiety disorders, Eating disorder and Bipolar disorders.

**Supplementary Table 2. Summary statistics of multiple linear regression models run on the prevalence of 10 mental health issues after controlling for overall healthcare spending (N=36).**

| Predictor                                        | Estimator coefficient | 95% Confidence interval | T value | Effect size (Pearson's r) | P value |
|--------------------------------------------------|-----------------------|-------------------------|---------|---------------------------|---------|
| <b>Combined mental health issues<sup>a</sup></b> |                       |                         |         |                           |         |
| HDI                                              | 20.5                  | 6.6 to 34.4             | 3.0     | 0.47                      | 0.005   |
| GINI index                                       | 16.9                  | 6.2 to 27.6             | 3.2     | 0.49                      | 0.003   |
| Unemployment                                     | 0.2                   | 0.1 to 0.3              | 3.7     | 0.54                      | 0.0009  |
| <b>Autism Spectrum Disorder</b>                  |                       |                         |         |                           |         |
| HDI                                              | 1.0                   | 0.1 to 1.8              | 2.3     | 0.38                      | 0.03    |
| GINI index                                       | 0.6                   | -0.1 to 1.3             | 1.5     | 0.31                      | 0.08    |
| Unemployment                                     | 0.004                 | -0.004 to 0.01          | 1.0     | 0.18                      | 0.3     |
| <b>ADHD</b>                                      |                       |                         |         |                           |         |
| HDI                                              | 2.4                   | -1.4 to 6.3             | 1.3     | 0.22                      | 0.2     |
| GINI index                                       | 2.6                   | -0.4 to 5.6             | 1.8     | 0.30                      | 0.1     |
| Unemployment                                     | 0.03                  | -0.008 to 0.06          | 1.6     | 0.27                      | 0.1     |
| <b>Depressive Disorders</b>                      |                       |                         |         |                           |         |
| HDI                                              | 6.2                   | 1.4 to 10.9             | 2.6     | 0.42                      | 0.01    |
| GINI index                                       | 6.3                   | 2.6 to 9.9              | 3.5     | 0.52                      | 0.001   |
| Unemployment                                     | 0.06                  | 0.02 to 0.1             | 2.8     | 0.45                      | 0.008   |
| <b>Schizophrenia</b>                             |                       |                         |         |                           |         |
| HDI                                              | 0.4                   | 0.04 to 0.8             | 2.3     | 0.38                      | 0.03    |
| GINI index                                       | 0.3                   | 0.01 to 0.6             | 2.1     | 0.35                      | 0.04    |
| Unemployment                                     | 0.002                 | -0.001 to 0.005         | 1.2     | 0.21                      | 0.2     |
| <b>Anxiety Disorders</b>                         |                       |                         |         |                           |         |
| HDI                                              | 9.6                   | -1.5 to 20.7            | 1.8     | 0.30                      | 0.09    |
| GINI index                                       | 6.9                   | -1.6 to 15.4            | 1.7     | 0.28                      | 0.1     |
| Unemployment                                     | 0.09                  | -0.001 to 0.2           | 2.0     | 0.34                      | 0.05    |
| <b>Eating Disorders</b>                          |                       |                         |         |                           |         |
| HDI                                              | 1.8                   | 0.5 to 3.1              | 2.8     | 0.44                      | 0.009   |
| GINI index                                       | 0.9                   | -0.1 to 1.9             | 1.8     | 0.31                      | 0.08    |
| Unemployment                                     | 0.02                  | 0.005 to 0.03           | 2.9     | 0.42                      | 0.007   |
| <b>Alcohol Use Disorders</b>                     |                       |                         |         |                           |         |
| HDI                                              | -2.2                  | -12.0 to 7.5            | -0.5    | -0.08                     | 0.6     |
| GINI index                                       | -1.0                  | -8.5 to 6.5             | -0.3    | -0.05                     | 0.8     |
| Unemployment                                     | -0.05                 | -0.1 to 0.04            | -1.1    | -0.20                     | 0.3     |

Supplementary Table 2 continued

| Predictor                | Estimator coefficient | 95% Confidence interval | T value | Effect size (Pearson's r) | P value |
|--------------------------|-----------------------|-------------------------|---------|---------------------------|---------|
| <b>Suicide</b>           |                       |                         |         |                           |         |
| HDI                      | -7.8                  | -54.2 to 38.7           | -0.3    | -0.06                     | 0.7     |
| GINI index               | -6.5                  | -42.3 to 29.2           | -0.4    | -0.07                     | 0.7     |
| Unemployment             | -0.4                  | -0.8 to -0.0008         | -2.0    | -0.34                     | 0.05    |
| <b>Bipolar Disorders</b> |                       |                         |         |                           |         |
| HDI                      | 1.2                   | -0.2 to 2.7             | 1.7     | 0.29                      | 0.09    |
| GINI index               | 0.3                   | -0.8 to 1.4             | 0.6     | 0.10                      | 0.6     |
| Unemployment             | 0.01                  | -0.001 to 0.02          | 1.8     | 0.30                      | 0.08    |

<sup>a</sup> this includes Autism Spectrum Disorders, ADHD, Conduct Disorders, Idiopathic developmental intellectual disability, Depressive disorders, Schizophrenia, Anxiety disorders, Eating disorder and Bipolar disorders.



**Supplementary Table 3. Summary statistics of multiple linear models run on the prevalence of 10 mental health issues using robust regression methods (after controlling for overall healthcare spending) (N=36).**

| Predictor                                           | Estimator coefficient | 95% Confidence interval | T value | Effect size (Pearson's r) | P value |
|-----------------------------------------------------|-----------------------|-------------------------|---------|---------------------------|---------|
| <b>Combined mental health disorders<sup>a</sup></b> |                       |                         |         |                           |         |
| HDI                                                 | 17.5                  | 4.5 to 30.5             | 2.7     | 0.44                      | 0.01    |
| GINI index                                          | 13.9                  | 3.8 to 24.0             | 2.8     | 0.44                      | 0.01    |
| Unemployment                                        | 0.2                   | 0.1 to 0.3              | 4.1     | 0.59                      | 0.0002  |
| <b>Autism Spectrum Disorders</b>                    |                       |                         |         |                           |         |
| HDI                                                 | 0.9                   | 0.2 to 1.6              | 2.6     | 0.42                      | 0.01    |
| GINI index                                          | 0.6                   | 0.06 to 1.1             | 2.3     | 0.37                      | 0.03    |
| Unemployment                                        | 0.004                 | -0.001 to 0.01          | 1.5     | 0.26                      | 0.1     |
| <b>ADHD</b>                                         |                       |                         |         |                           |         |
| HDI                                                 | 1.5                   | -1.6 to 4.6             | 1.0     | 0.17                      | 0.3     |
| GINI index                                          | 1.5                   | -0.8 to 3.9             | 1.3     | 0.23                      | 0.2     |
| Unemployment                                        | 0.03                  | 0.0009 to 0.05          | 2.1     | 0.35                      | 0.04    |
| <b>Depressive Disorders</b>                         |                       |                         |         |                           |         |
| HDI                                                 | 6.4                   | 1.6 to 11.2             | 2.7     | 0.43                      | 0.01    |
| GINI index                                          | 6.7                   | 3.0 to 10.4             | 3.7     | 0.55                      | 0.0008  |
| Unemployment                                        | 0.06                  | 0.02 to 0.1             | 2.8     | 0.45                      | 0.008   |
| <b>Schizophrenia</b>                                |                       |                         |         |                           |         |
| HDI                                                 | 0.3                   | -0.0003 to 0.7          | 2.0     | 0.34                      | 0.05    |
| GINI index                                          | 0.2                   | -0.02 to 0.5            | 1.9     | 0.32                      | 0.07    |
| Unemployment                                        | 0.002                 | -0.001 to 0.005         | 1.3     | 0.23                      | 0.2     |
| <b>Anxiety Disorders</b>                            |                       |                         |         |                           |         |
| HDI                                                 | 7.4                   | -2.6 to 17.5            | 1.5     | 0.26                      | 0.1     |
| GINI index                                          | 4.4                   | -3.5 to 12.3            | 1.1     | 0.20                      | 0.3     |
| Unemployment                                        | 0.1                   | 0.02 to 0.2             | 2.4     | 0.40                      | 0.02    |
| <b>Eating Disorders</b>                             |                       |                         |         |                           |         |
| HDI                                                 | 1.9                   | 0.8 to 3.0              | 3.5     | 0.52                      | 0.001   |
| GINI index                                          | 1.2                   | 0.3 to 2.0              | 2.7     | 0.43                      | 0.01    |
| Unemployment                                        | 0.02                  | 0.006 to 0.02           | 3.4     | 0.52                      | 0.002   |
| <b>Alcohol Use Disorders</b>                        |                       |                         |         |                           |         |
| HDI                                                 | 0.9                   | -6.4 to 8.2             | 0.3     | 0.04                      | 0.8     |
| GINI index                                          | -1.2                  | -6.7 to 4.4             | -0.4    | -0.07                     | 0.7     |
| Unemployment                                        | -0.05                 | -0.1 to 0.02            | -1.5    | -0.26                     | 0.1     |

Supplementary Table 3 continued

| Predictor                | Estimator coefficient | 95% Confidence interval | T value | Effect size (Pearson's r) | P value |
|--------------------------|-----------------------|-------------------------|---------|---------------------------|---------|
| <b>Suicide</b>           |                       |                         |         |                           |         |
| HDI                      | -3.2                  | -35.5 to 29.1           | -0.2    | -0.04                     | 0.8     |
| GINI index               | -18.8                 | -43.8 to 6.3            | -1.5    | -0.26                     | 0.1     |
| Unemployment             | -0.4                  | -0.6 to -0.09           | -2.7    | -0.43                     | 0.01    |
| <b>Bipolar Disorders</b> |                       |                         |         |                           |         |
| HDI                      | 1.4                   | -0.05 to 2.8            | 2.0     | 0.33                      | 0.06    |
| GINI index               | 0.5                   | -0.6 to 1.6             | 0.9     | 0.16                      | 0.4     |
| Unemployment             | 0.01                  | -0.001 to 0.02          | 1.8     | 0.30                      | 0.08    |

<sup>a</sup> this includes Autism Spectrum Disorders, ADHD, Conduct Disorders, Idiopathic developmental intellectual disability, Depressive disorders, Schizophrenia, Anxiety disorders, Eating disorder and Bipolar disorders.

**REFERENCES**

- 1 Maronna RA, Martin RD, Yohai VJ, Salibián-Barrera M. *Robust statistics: theory and methods (with R)*. John Wiley & Sons, 2019.
- 2 Koller M, Stahel WA. Sharpening wald-type inference in robust regression for small samples. *Comput Stat Data Anal* 2011; **55**: 2504–2515.

For peer review only

1  
2  
3  
4  
5  
6  
7  
8  
9  
10  
11  
12  
13  
14  
15  
16  
17  
18  
19  
20  
21  
22  
23  
24  
25  
26  
27  
28  
29  
30  
31  
32  
33  
34  
35  
36  
37  
38  
39  
40  
41  
42  
43  
44  
45  
46  
47  
48  
49  
50  
51  
52  
53  
54  
55  
56  
57  
58  
59  
60STROBE Statement—Checklist of items that should be included in reports of *cross-sectional studies*

|                              | Item No | Recommendation                                                                                                                                                                                               |
|------------------------------|---------|--------------------------------------------------------------------------------------------------------------------------------------------------------------------------------------------------------------|
| <b>Title and abstract</b>    | 1 ✓     | (a) Indicate the study's design with a commonly used term in the title or the abstract                                                                                                                       |
|                              | ✓       | (b) Provide in the abstract an informative and balanced summary of what was done and what was found                                                                                                          |
| <b>Introduction</b>          |         |                                                                                                                                                                                                              |
| Background/rationale         | 2 ✓     | Explain the scientific background and rationale for the investigation being reported                                                                                                                         |
| Objectives                   | 3 ✓     | State specific objectives, including any prespecified hypotheses                                                                                                                                             |
| <b>Methods</b>               |         |                                                                                                                                                                                                              |
| Study design                 | 4 ✓     | Present key elements of study design early in the paper                                                                                                                                                      |
| Setting                      | 5 ✓     | Describe the setting, locations, and relevant dates, including periods of recruitment, exposure, follow-up, and data collection                                                                              |
| Participants                 | 6 ✓     | (a) Give the eligibility criteria, and the sources and methods of selection of participants                                                                                                                  |
| Variables                    | 7 ✓     | Clearly define all outcomes, exposures, predictors, potential confounders, and effect modifiers. Give diagnostic criteria, if applicable                                                                     |
| Data sources/<br>measurement | 8* ✓    | For each variable of interest, give sources of data and details of methods of assessment (measurement). Describe comparability of assessment methods if there is more than one group                         |
| Bias                         | 9 ✓     | Describe any efforts to address potential sources of bias                                                                                                                                                    |
| Study size                   | 10 ✓    | Explain how the study size was arrived at                                                                                                                                                                    |
| Quantitative variables       | 11 ✓    | Explain how quantitative variables were handled in the analyses. If applicable, describe which groupings were chosen and why                                                                                 |
| Statistical methods          | 12 ✓    | (a) Describe all statistical methods, including those used to control for confounding                                                                                                                        |
|                              | ✓       | (b) Describe any methods used to examine subgroups and interactions                                                                                                                                          |
|                              | ✓       | (c) Explain how missing data were addressed                                                                                                                                                                  |
|                              | ✓       | (d) If applicable, describe analytical methods taking account of sampling strategy                                                                                                                           |
|                              | ✓       | (e) Describe any sensitivity analyses                                                                                                                                                                        |
| <b>Results</b>               |         |                                                                                                                                                                                                              |
| Participants                 | 13* ✓   | (a) Report numbers of individuals at each stage of study—eg numbers potentially eligible, examined for eligibility, confirmed eligible, included in the study, completing follow-up, and analysed            |
|                              | ✓       | (b) Give reasons for non-participation at each stage                                                                                                                                                         |
|                              | ✓       | (c) Consider use of a flow diagram                                                                                                                                                                           |
| Descriptive data             | 14* ✓   | (a) Give characteristics of study participants (eg demographic, clinical, social) and information on exposures and potential confounders                                                                     |
|                              | ✓       | (b) Indicate number of participants with missing data for each variable of interest                                                                                                                          |
| Outcome data                 | 15* ✓   | Report numbers of outcome events or summary measures                                                                                                                                                         |
| Main results                 | 16 ✓    | (a) Give unadjusted estimates and, if applicable, confounder-adjusted estimates and their precision (eg, 95% confidence interval). Make clear which confounders were adjusted for and why they were included |
|                              | ✓       | (b) Report category boundaries when continuous variables were categorized                                                                                                                                    |
|                              | ✓       | (c) If relevant, consider translating estimates of relative risk into absolute risk for a meaningful time period                                                                                             |
| Other analyses               | 17 ✓    | Report other analyses done—eg analyses of subgroups and interactions, and sensitivity analyses                                                                                                               |

|                          |      |                                                                                                                                                                            |
|--------------------------|------|----------------------------------------------------------------------------------------------------------------------------------------------------------------------------|
| <b>Discussion</b>        |      |                                                                                                                                                                            |
| Key results              | 18 ✓ | Summarise key results with reference to study objectives                                                                                                                   |
| Limitations              | 19 ✓ | Discuss limitations of the study, taking into account sources of potential bias or imprecision. Discuss both direction and magnitude of any potential bias                 |
| Interpretation           | 20 ✓ | Give a cautious overall interpretation of results considering objectives, limitations, multiplicity of analyses, results from similar studies, and other relevant evidence |
| Generalisability         | 21 ✓ | Discuss the generalisability (external validity) of the study results                                                                                                      |
| <b>Other information</b> |      |                                                                                                                                                                            |
| Funding                  | 22 ✓ | Give the source of funding and the role of the funders for the present study and, if applicable, for the original study on which the present article is based              |

\*Give information separately for exposed and unexposed groups.

**Note:** An Explanation and Elaboration article discusses each checklist item and gives methodological background and published examples of transparent reporting. The STROBE checklist is best used in conjunction with this article (freely available on the Web sites of PLoS Medicine at <http://www.plosmedicine.org/>, Annals of Internal Medicine at <http://www.annals.org/>, and Epidemiology at <http://www.epidem.com/>). Information on the STROBE Initiative is available at [www.strobe-statement.org](http://www.strobe-statement.org).
