# Supplementary material for: Ecological study of the association between mental illness with human development, income inequalities and unemployment across OECD countries
Source: PubMed Central journal article supplement — BMJ Open. 2020 Apr 20;10(4):e035055. doi: 10.1136/bmjopen-2019-035055 (PMC7204933; doi:10.1136/bmjopen-2019-035055), 2020-04-20
Supplement: bmjopen-2019-035055supp001.pdf [file bmjopen-2019-035055supp001.pdf]

## SUPPLEMENTARY MATERIAL

### SUPPLEMENTARY RESULTS

#### Analysis taking into account overall healthcare spending

To ensure that our results were not impacted by overall healthcare expenditures, we decided to regress out the influence of healthcare spending on the prevalence of each mental health issue and to re-run our analysis using the residuals as dependent variables. When performed on a combination of mental health disorders, multiple linear regression models revealed that the effect of development ( $r_{\text{HDI}}$ ), inequalities ( $r_{\text{GINI}}$ ) and unemployment ( $r_{\text{unemploy}}$ ) was medium to large ( $r$  range: 0.47-0.54). However they demonstrated great variation when performed amongst different mental health issues ( $r$  range: -0.34 to 0.52, **Supplementary Table 2**).

Across mental issues, the socio-economic indicators' effect sizes were strongly related to each other ( $r_{\text{HDI-GINI}}=0.89$ ,  $r_{\text{HDI-unemploy}}=0.93$ ,  $r_{\text{unemploy-GINI}}=0.87$ ). Principal component analysis demonstrated that the first principal component of the three variables ( $r_{\text{HDI}}$ ,  $r_{\text{GINI}}$ ,  $r_{\text{unemploy}}$ ) explained 94% of the variance ( $p=0$ , permutation test with 1000 repetitions).

Therefore, this analysis yield similar results than that reported in the main text.

#### Analysis using robust regression methods

To ensure that our results were not impacted by outliers, we re-ran our analyses using robust regression methods [1]. We used the `lmrob` function from the `robustbase` package in R (version 3.6.1), which computes fast MM-type estimators for linear regression models. We sat the default arguments as suggested in Koller and Stahel (2011) with an initial S-estimate, followed by an M-estimate, a Design Adaptive Scale estimate and a final M-step; and a “linear quadratic quadratic” (lqq for short) psi function [2].

When performed on a combination of mental health disorders, multiple linear regression

models revealed that the effect of development ( $r_{\text{HDI}}$ ), inequalities ( $r_{\text{GINI}}$ ) and unemployment ( $r_{\text{unemploy}}$ ) was medium to large ( $r$  range: 0.44-0.59). However they demonstrated great variation when performed amongst different mental health issues ( $r$  range: -0.43 to 0.55, **Supplementary Table 3**). Across mental issues, the socio-economic indicators' effect sizes were strongly related to each other ( $r_{\text{HDI-GINI}}=0.93$ ,  $r_{\text{HDI-unemploy}}=0.87$ ,  $r_{\text{unemploy-GINI}}=0.91$ ). Principal component analysis demonstrated that the first principal component of the three variables ( $r_{\text{HDI}}$ ,  $r_{\text{GINI}}$ ,  $r_{\text{unemploy}}$ ) explained 94% of the variance ( $p=0$ , permutation test with 1000 repetitions).

Therefore, results using robust linear regression methods were highly comparable to those using non-robust methods.

## SUPPLEMENTARY TABLES

**Supplementary Table 1. Summary statistics of multiple linear regression models run on the prevalence of 10 mental health issues (N=36).**

| Predictor                                        | Estimator coefficient | 95% Confidence interval | T value | Effect size (Pearson's r) | P value   |
|--------------------------------------------------|-----------------------|-------------------------|---------|---------------------------|-----------|
| <b>Combined mental health issues<sup>a</sup></b> |                       |                         |         |                           |           |
| HDI                                              | 45.9                  | 31.8 to 60.1            | 6.6     | 0.76                      | 0.0000002 |
| GINI index                                       | 22.1                  | 11.2 to 33.0            | 4.1     | 0.59                      | 0.0002    |
| Unemployment                                     | 0.2                   | 0.08 to 0.3             | 3.3     | 0.51                      | 0.002     |
| <b>Autism Spectrum Disorder</b>                  |                       |                         |         |                           |           |
| HDI                                              | 2.5                   | 1.7 to 3.3              | 6.3     | 0.74                      | 0.0000005 |
| GINI index                                       | 0.9                   | 0.3 to 1.5              | 3.0     | 0.46                      | 0.006     |
| Unemployment                                     | 0.003                 | -0.004 to 0.01          | 0.8     | 0.15                      | 0.4       |
| <b>ADHD</b>                                      |                       |                         |         |                           |           |
| HDI                                              | 2.3                   | -1.6 to 6.1             | 1.2     | 0.21                      | 0.2       |
| GINI index                                       | 2.6                   | -0.4 to 5.6             | 1.8     | 0.30                      | 0.09      |
| Unemployment                                     | 0.03                  | -0.007 to 0.06          | 1.6     | 0.27                      | 0.1       |
| <b>Depressive Disorders</b>                      |                       |                         |         |                           |           |
| HDI                                              | 12.3                  | 7.6 to 17.1             | 5.2     | 0.68                      | 0.0000009 |
| GINI index                                       | 7.5                   | 3.9 to 11.2             | 4.2     | 0.59                      | 0.0002    |
| Unemployment                                     | 0.05                  | 0.01 to 0.09            | 2.6     | 0.42                      | 0.01      |
| <b>Schizophrenia</b>                             |                       |                         |         |                           |           |
| HDI                                              | 1.0                   | 0.6 to 1.3              | 5.8     | 0.72                      | 0.000002  |
| GINI index                                       | 0.4                   | 0.1 to 0.7              | 3.1     | 0.49                      | 0.004     |
| Unemployment                                     | 0.001                 | -0.001 to 0.004         | 1.0     | 0.18                      | 0.3       |
| <b>Anxiety Disorders</b>                         |                       |                         |         |                           |           |
| HDI                                              | 27.4                  | 15.9 to 38.9            | 4.9     | 0.65                      | 0.00003   |
| GINI index                                       | 10.6                  | 1.7 to 19.4             | 2.4     | 0.40                      | 0.02      |
| Unemployment                                     | 0.08                  | -0.02 to 0.2            | 1.7     | 0.29                      | 0.1       |
| <b>Eating Disorders</b>                          |                       |                         |         |                           |           |
| HDI                                              | 3.7                   | 2.5 to 4.9              | 6.2     | 0.74                      | 0.0000005 |
| GINI index                                       | 1.3                   | 0.4 to 2.2              | 2.8     | 0.45                      | 0.008     |
| Unemployment                                     | 0.01                  | 0.004 to 0.02           | 2.8     | 0.45                      | 0.008     |
| <b>Alcohol Use Disorders</b>                     |                       |                         |         |                           |           |
| HDI                                              | -7.6                  | -17.5 to 2.3            | -1.6    | -0.27                     | 0.1       |
| GINI index                                       | -2.1                  | -9.7 to 5.5             | -0.6    | -0.10                     | 0.6       |
| Unemployment                                     | -0.04                 | -0.1 to 0.04            | -1.0    | -0.18                     | 0.3       |

Supplementary Table 1 continued

| Predictor                | Estimator coefficient | 95% Confidence interval | T value | Effect size (Pearson's r) | P value |
|--------------------------|-----------------------|-------------------------|---------|---------------------------|---------|
| <b>Suicide</b>           |                       |                         |         |                           |         |
| HDI                      | -9.1                  | -55.6 to 37.4           | -0.4    | -0.07                     | 0.7     |
| GINI index               | -6.8                  | -42.6 to 28.9           | -0.4    | -0.07                     | 0.7     |
| Unemployment             | -0.4                  | -0.8 to 0.0005          | -2.0    | -0.34                     | 0.05    |
| <b>Bipolar Disorders</b> |                       |                         |         |                           |         |
| HDI                      | 1.8                   | 0.4 to 3.2              | 2.7     | 0.43                      | 0.01    |
| GINI index               | 0.4                   | -0.6 to 1.5             | 0.8     | 0.14                      | 0.4     |
| Unemployment             | 0.01                  | -0.001 to 0.02          | 1.8     | 0.30                      | 0.08    |

<sup>a</sup> this includes Autism Spectrum Disorders, ADHD, Conduct Disorders, Idiopathic developmental intellectual disability, Depressive disorders, Schizophrenia, Anxiety disorders, Eating disorder and Bipolar disorders.

**Supplementary Table 2. Summary statistics of multiple linear regression models run on the prevalence of 10 mental health issues after controlling for overall healthcare spending (N=36).**

| Predictor                                        | Estimator coefficient | 95% Confidence interval | T value | Effect size (Pearson's r) | P value |
|--------------------------------------------------|-----------------------|-------------------------|---------|---------------------------|---------|
| <b>Combined mental health issues<sup>a</sup></b> |                       |                         |         |                           |         |
| HDI                                              | 20.5                  | 6.6 to 34.4             | 3.0     | 0.47                      | 0.005   |
| GINI index                                       | 16.9                  | 6.2 to 27.6             | 3.2     | 0.49                      | 0.003   |
| Unemployment                                     | 0.2                   | 0.1 to 0.3              | 3.7     | 0.54                      | 0.0009  |
| <b>Autism Spectrum Disorder</b>                  |                       |                         |         |                           |         |
| HDI                                              | 1.0                   | 0.1 to 1.8              | 2.3     | 0.38                      | 0.03    |
| GINI index                                       | 0.6                   | -0.1 to 1.3             | 1.5     | 0.31                      | 0.08    |
| Unemployment                                     | 0.004                 | -0.004 to 0.01          | 1.0     | 0.18                      | 0.3     |
| <b>ADHD</b>                                      |                       |                         |         |                           |         |
| HDI                                              | 2.4                   | -1.4 to 6.3             | 1.3     | 0.22                      | 0.2     |
| GINI index                                       | 2.6                   | -0.4 to 5.6             | 1.8     | 0.30                      | 0.1     |
| Unemployment                                     | 0.03                  | -0.008 to 0.06          | 1.6     | 0.27                      | 0.1     |
| <b>Depressive Disorders</b>                      |                       |                         |         |                           |         |
| HDI                                              | 6.2                   | 1.4 to 10.9             | 2.6     | 0.42                      | 0.01    |
| GINI index                                       | 6.3                   | 2.6 to 9.9              | 3.5     | 0.52                      | 0.001   |
| Unemployment                                     | 0.06                  | 0.02 to 0.1             | 2.8     | 0.45                      | 0.008   |
| <b>Schizophrenia</b>                             |                       |                         |         |                           |         |
| HDI                                              | 0.4                   | 0.04 to 0.8             | 2.3     | 0.38                      | 0.03    |
| GINI index                                       | 0.3                   | 0.01 to 0.6             | 2.1     | 0.35                      | 0.04    |
| Unemployment                                     | 0.002                 | -0.001 to 0.005         | 1.2     | 0.21                      | 0.2     |
| <b>Anxiety Disorders</b>                         |                       |                         |         |                           |         |
| HDI                                              | 9.6                   | -1.5 to 20.7            | 1.8     | 0.30                      | 0.09    |
| GINI index                                       | 6.9                   | -1.6 to 15.4            | 1.7     | 0.28                      | 0.1     |
| Unemployment                                     | 0.09                  | -0.001 to 0.2           | 2.0     | 0.34                      | 0.05    |
| <b>Eating Disorders</b>                          |                       |                         |         |                           |         |
| HDI                                              | 1.8                   | 0.5 to 3.1              | 2.8     | 0.44                      | 0.009   |
| GINI index                                       | 0.9                   | -0.1 to 1.9             | 1.8     | 0.31                      | 0.08    |
| Unemployment                                     | 0.02                  | 0.005 to 0.03           | 2.9     | 0.42                      | 0.007   |
| <b>Alcohol Use Disorders</b>                     |                       |                         |         |                           |         |
| HDI                                              | -2.2                  | -12.0 to 7.5            | -0.5    | -0.08                     | 0.6     |
| GINI index                                       | -1.0                  | -8.5 to 6.5             | -0.3    | -0.05                     | 0.8     |
| Unemployment                                     | -0.05                 | -0.1 to 0.04            | -1.1    | -0.20                     | 0.3     |

Supplementary Table 2 continued

| Predictor                | Estimator coefficient | 95% Confidence interval | T value | Effect size (Pearson's r) | P value |
|--------------------------|-----------------------|-------------------------|---------|---------------------------|---------|
| <b>Suicide</b>           |                       |                         |         |                           |         |
| HDI                      | -7.8                  | -54.2 to 38.7           | -0.3    | -0.06                     | 0.7     |
| GINI index               | -6.5                  | -42.3 to 29.2           | -0.4    | -0.07                     | 0.7     |
| Unemployment             | -0.4                  | -0.8 to -0.0008         | -2.0    | -0.34                     | 0.05    |
| <b>Bipolar Disorders</b> |                       |                         |         |                           |         |
| HDI                      | 1.2                   | -0.2 to 2.7             | 1.7     | 0.29                      | 0.09    |
| GINI index               | 0.3                   | -0.8 to 1.4             | 0.6     | 0.10                      | 0.6     |
| Unemployment             | 0.01                  | -0.001 to 0.02          | 1.8     | 0.30                      | 0.08    |

<sup>a</sup> this includes Autism Spectrum Disorders, ADHD, Conduct Disorders, Idiopathic developmental intellectual disability, Depressive disorders, Schizophrenia, Anxiety disorders, Eating disorder and Bipolar disorders.

**Supplementary Table 3. Summary statistics of multiple linear models run on the prevalence of 10 mental health issues using robust regression methods (after controlling for overall healthcare spending) (N=36).**

| Predictor                                           | Estimator coefficient | 95% Confidence interval | T value | Effect size (Pearson's r) | P value |
|-----------------------------------------------------|-----------------------|-------------------------|---------|---------------------------|---------|
| <b>Combined mental health disorders<sup>a</sup></b> |                       |                         |         |                           |         |
| HDI                                                 | 17.5                  | 4.5 to 30.5             | 2.7     | 0.44                      | 0.01    |
| GINI index                                          | 13.9                  | 3.8 to 24.0             | 2.8     | 0.44                      | 0.01    |
| Unemployment                                        | 0.2                   | 0.1 to 0.3              | 4.1     | 0.59                      | 0.0002  |
| <b>Autism Spectrum Disorders</b>                    |                       |                         |         |                           |         |
| HDI                                                 | 0.9                   | 0.2 to 1.6              | 2.6     | 0.42                      | 0.01    |
| GINI index                                          | 0.6                   | 0.06 to 1.1             | 2.3     | 0.37                      | 0.03    |
| Unemployment                                        | 0.004                 | -0.001 to 0.01          | 1.5     | 0.26                      | 0.1     |
| <b>ADHD</b>                                         |                       |                         |         |                           |         |
| HDI                                                 | 1.5                   | -1.6 to 4.6             | 1.0     | 0.17                      | 0.3     |
| GINI index                                          | 1.5                   | -0.8 to 3.9             | 1.3     | 0.23                      | 0.2     |
| Unemployment                                        | 0.03                  | 0.0009 to 0.05          | 2.1     | 0.35                      | 0.04    |
| <b>Depressive Disorders</b>                         |                       |                         |         |                           |         |
| HDI                                                 | 6.4                   | 1.6 to 11.2             | 2.7     | 0.43                      | 0.01    |
| GINI index                                          | 6.7                   | 3.0 to 10.4             | 3.7     | 0.55                      | 0.0008  |
| Unemployment                                        | 0.06                  | 0.02 to 0.1             | 2.8     | 0.45                      | 0.008   |
| <b>Schizophrenia</b>                                |                       |                         |         |                           |         |
| HDI                                                 | 0.3                   | -0.0003 to 0.7          | 2.0     | 0.34                      | 0.05    |
| GINI index                                          | 0.2                   | -0.02 to 0.5            | 1.9     | 0.32                      | 0.07    |
| Unemployment                                        | 0.002                 | -0.001 to 0.005         | 1.3     | 0.23                      | 0.2     |
| <b>Anxiety Disorders</b>                            |                       |                         |         |                           |         |
| HDI                                                 | 7.4                   | -2.6 to 17.5            | 1.5     | 0.26                      | 0.1     |
| GINI index                                          | 4.4                   | -3.5 to 12.3            | 1.1     | 0.20                      | 0.3     |
| Unemployment                                        | 0.1                   | 0.02 to 0.2             | 2.4     | 0.40                      | 0.02    |
| <b>Eating Disorders</b>                             |                       |                         |         |                           |         |
| HDI                                                 | 1.9                   | 0.8 to 3.0              | 3.5     | 0.52                      | 0.001   |
| GINI index                                          | 1.2                   | 0.3 to 2.0              | 2.7     | 0.43                      | 0.01    |
| Unemployment                                        | 0.02                  | 0.006 to 0.02           | 3.4     | 0.52                      | 0.002   |
| <b>Alcohol Use Disorders</b>                        |                       |                         |         |                           |         |
| HDI                                                 | 0.9                   | -6.4 to 8.2             | 0.3     | 0.04                      | 0.8     |
| GINI index                                          | -1.2                  | -6.7 to 4.4             | -0.4    | -0.07                     | 0.7     |
| Unemployment                                        | -0.05                 | -0.1 to 0.02            | -1.5    | -0.26                     | 0.1     |

Supplementary Table 3 continued

| Predictor                | Estimator coefficient | 95% Confidence interval | T value | Effect size (Pearson's r) | P value |
|--------------------------|-----------------------|-------------------------|---------|---------------------------|---------|
| <b>Suicide</b>           |                       |                         |         |                           |         |
| HDI                      | -3.2                  | -35.5 to 29.1           | -0.2    | -0.04                     | 0.8     |
| GINI index               | -18.8                 | -43.8 to 6.3            | -1.5    | -0.26                     | 0.1     |
| Unemployment             | -0.4                  | -0.6 to -0.09           | -2.7    | -0.43                     | 0.01    |
| <b>Bipolar Disorders</b> |                       |                         |         |                           |         |
| HDI                      | 1.4                   | -0.05 to 2.8            | 2.0     | 0.33                      | 0.06    |
| GINI index               | 0.5                   | -0.6 to 1.6             | 0.9     | 0.16                      | 0.4     |
| Unemployment             | 0.01                  | -0.001 to 0.02          | 1.8     | 0.30                      | 0.08    |

<sup>a</sup> this includes Autism Spectrum Disorders, ADHD, Conduct Disorders, Idiopathic developmental intellectual disability, Depressive disorders, Schizophrenia, Anxiety disorders, Eating disorder and Bipolar disorders.



**REFERENCES**

- 1 Maronna RA, Martin RD, Yohai VJ, Salibián-Barrera M. *Robust statistics: theory and methods (with R)*. John Wiley & Sons, 2019.
- 2 Koller M, Stahel WA. Sharpening wald-type inference in robust regression for small samples. *Comput Stat Data Anal* 2011; **55**: 2504–2515.
